# Supplementary material for: FLI1 induces erythroleukemia through opposing effects on UBASH3A and UBASH3B expression
Source: PubMed Central journal article supplement (PMC10925000; doi:10.1186/s12885-024-12075-2), 2024-03-09
Supplement: 12885_2024_12075_MOESM1_ESM.pdf [file 12885_2024_12075_MOESM1_ESM.pdf]

**Supplemental Table 1. Differential expression of genes in Scrambled and shUBASH3A1**

|    | Gene ID   | Gene Symbol     | Scrambled FPKM | shUBASH3A FPKM | log2FoldChange | Padj        |
|----|-----------|-----------------|----------------|----------------|----------------|-------------|
| 1  | 8363      | H4C11           | 0              | 5.83           | 9.1873521      | 0.002460748 |
| 2  | 100529063 | BCL2L2-PABPN1   | 0              | 4.56           | 8.83289        | 5.60E-36    |
| 3  | 58530     | LY6G6D          | 0              | 3.92           | 8.6147098      | 0.014928517 |
| 4  | 632       | BGLAP           | 0              | 2.6            | 8.0223678      | 0.008165034 |
| 5  | 6757      | SSX2            | 0              | 1.27           | 6.9886847      | 9.48E-06    |
| 6  | 728689    | EIF3CL          | 0              | 1.1            | 6.7813597      | 5.31E-11    |
| 7  | 102723680 | CT45A9          | 0              | 0.82           | 6.357552       | 0.001345342 |
| 8  | 1159      | CKMT1B          | 0              | 0.8            | 6.3219281      | 1.14E-04    |
| 9  | 390066    | OR52D1          | 0              | 0.65           | 6.0223678      | 0.01492568  |
| 10 | 24150     | TP53TG3         | 0              | 0.46           | 5.523562       | 0.002460174 |
| 11 | 2826      | CCR10           | 0              | 0.43           | 5.4262648      | 0.004495456 |
| 12 | 106821730 | BUB1B-PAK6      | 0              | 0.39           | 5.2854022      | 5.08E-06    |
| 13 | 1179      | CLCA1           | 0              | 0.38           | 5.2479275      | 1.14E-04    |
| 14 | 347051    | SLC10A5         | 0              | 0.33           | 5.0443941      | 0.048313502 |
| 15 | 374907    | B3GNT8          | 0              | 0.32           | 5              | 0.002461323 |
| 16 | 359       | AQP2            | 0.02           | 0.51           | 4.6724253      | 1.28E-07    |
| 17 | 140711    | TLDC2           | 0              | 0.22           | 4.4594316      | 0.048290144 |
| 18 | 100526832 | PHOSPHO2-KLHL23 | 0              | 0.2            | 4.3219281      | 0.001345007 |
| 19 | 84699     | CREB3L3         | 0              | 0.17           | 4.0874628      | 0.048297928 |
| 20 | 64850     | ETNPPL          | 0.04           | 0.56           | 3.8073549      | 2.85E-04    |
| 21 | 353376    | TICAM2          | 0              | 0.14           | 3.8073549      | 0.048305714 |
| 22 | 102724219 | LOC102724219    | 0.21           | 2.78           | 3.7266237      | 4.78E-38    |
| 23 | 163732    | CITED4          | 0.06           | 0.62           | 3.3692338      | 0.023551908 |
| 24 | 92211     | CDHR1           | 0.01           | 0.1            | 3.3219281      | 0.023543452 |
| 25 | 280658    | SSX7            | 0.07           | 0.69           | 3.3011695      | 0.013867209 |
| 26 | 115827    | RAB3C           | 0.02           | 0.19           | 3.2479275      | 1.31E-04    |
| 27 | 56001     | NXF2            | 0.03           | 0.28           | 3.2223924      | 0.03948774  |
| 28 | 85319     | BAGE2           | 0.11           | 1.02           | 3.2129937      | 2.98E-05    |
| 29 | 201633    | TIGIT           | 0.01           | 0.09           | 3.169925       | 5.52E-07    |
| 30 | 90506     | LRRC46          | 0.08           | 0.68           | 3.0874628      | 0.00226723  |
| 31 | 102724473 | GAGE10          | 0.69           | 5.57           | 3.0130091      | 3.69E-04    |
| 32 | 4744      | NEFH            | 0.98           | 7.71           | 2.9758772      | 1.38E-68    |
| 33 | 11189     | CELF3           | 0.06           | 0.42           | 2.8073549      | 3.41E-07    |
| 34 | 7757      | ZNF208          | 0.01           | 0.07           | 2.8073549      | 0.023547679 |
| 35 | 5649      | RELN            | 0.03           | 0.18           | 2.5849625      | 7.35E-05    |
| 36 | 7373      | COL14A1         | 0              | 0.06           | 2.5849625      | 0.027039228 |
| 37 | 3303      | HSPA1A          | 12.43          | 74.56          | 2.5845756      | 0           |
| 38 | 2348      | FOLR1           | 0.41           | 2.45           | 2.5790859      | 4.50E-04    |
| 39 | 29106     | SCG3            | 0.07           | 0.38           | 2.4405726      | 0.007168977 |
| 40 | 26872     | STEAP1          | 0.14           | 0.75           | 2.4214638      | 0.044022265 |
| 41 | 79541     | OR2A4           | 0.14           | 0.73           | 2.3824696      | 0.007167499 |
| 42 | 346673    | STRA8           | 0.12           | 0.62           | 2.3692338      | 0.027528884 |
| 43 | 3050      | HBZ             | 101.47         | 515.62         | 2.345255       | 0           |
| 44 | 64478     | CSMD1           | 0.03           | 0.15           | 2.3219281      | 0.001192952 |
| 45 | 92558     | BICDL1          | 0.11           | 0.54           | 2.2954559      | 0.004947172 |
| 46 | 10683     | DLL3            | 0.08           | 0.39           | 2.2854022      | 0.044015038 |
| 47 | 28984     | RGCC            | 0.68           | 3.29           | 2.2744809      | 9.14E-05    |
| 48 | 3399      | ID3             | 1.78           | 8.55           | 2.2640472      | 4.12E-11    |
| 49 | 728215    | FAM155A         | 0.1            | 0.48           | 2.2630344      | 3.86E-05    |
| 50 | 339456    | TMEM52          | 1.31           | 6.22           | 2.2473478      | 5.06E-08    |
| 51 | 7022      | TFAP2C          | 0.1            | 0.47           | 2.2326608      | 0.007569883 |
| 52 | 54913     | RPP25           | 0.19           | 0.89           | 2.2278059      | 5.44E-04    |
| 53 | 101059906 | LOC101059906    | 0.11           | 0.51           | 2.2129937      | 0.018287264 |
| 54 | 2104      | ESRRG           | 0.05           | 0.23           | 2.2016339      | 0.004465517 |
| 55 | 347735    | SERINC2         | 0.12           | 0.51           | 2.0874628      | 0.044368745 |
| 56 | 445582    | POTEE           | 0.17           | 0.72           | 2.0824622      | 1.53E-05    |
| 57 | 84528     | RHOXF2          | 1.89           | 7.64           | 2.0151864      | 4.72E-32    |
| 58 | 57520     | HECW2           | 0.02           | 0.08           | 2              | 0.018283872 |

|     |           |               |        |         |           |             |
|-----|-----------|---------------|--------|---------|-----------|-------------|
| 59  | 54970     | TTC12         | 0.22   | 0.87    | 1.9835119 | 0.004705637 |
| 60  | 51083     | GAL           | 15.88  | 61.63   | 1.9564219 | 1.75E-44    |
| 61  | 8927      | BSN           | 0.15   | 0.58    | 1.9510904 | 3.24E-14    |
| 62  | 28999     | KLF15         | 0.12   | 0.46    | 1.9385995 | 0.04255609  |
| 63  | 256227    | STEAP1B       | 0.59   | 2.25    | 1.9311381 | 3.61E-04    |
| 64  | 11187     | PKP3          | 1.95   | 7.35    | 1.9142701 | 3.59E-28    |
| 65  | 113835    | ZNF257        | 0.11   | 0.41    | 1.8981204 | 0.007394137 |
| 66  | 644815    | FAM83G        | 0.31   | 1.15    | 1.8912937 | 6.68E-09    |
| 67  | 50512     | PODXL2        | 2.11   | 7.78    | 1.8825272 | 7.11E-22    |
| 68  | 793       | CALB1         | 0.45   | 1.64    | 1.8656989 | 4.65E-06    |
| 69  | 197342    | EME2          | 0.72   | 2.62    | 1.863498  | 1.52E-04    |
| 70  | 3748      | KCNC3         | 0.51   | 1.84    | 1.8511366 | 1.55E-16    |
| 71  | 92421     | CHMP4C        | 0.17   | 0.61    | 1.8432745 | 0.042563115 |
| 72  | 3040      | HBA2          | 389.37 | 1396.65 | 1.8427569 | 0           |
| 73  | 79918     | SETD6         | 0.6    | 2.14    | 1.8345764 | 9.08E-05    |
| 74  | 84253     | GARNL3        | 0.09   | 0.32    | 1.830075  | 0.028176443 |
| 75  | 351       | APP           | 1.23   | 4.37    | 1.828975  | 2.12E-14    |
| 76  | 7164      | TPD52L1       | 1.54   | 5.44    | 1.8206763 | 6.53E-06    |
| 77  | 4113      | MAGEB2        | 1      | 3.51    | 1.811471  | 4.82E-07    |
| 78  | 55287     | TMEM40        | 0.14   | 0.49    | 1.8073549 | 0.027533722 |
| 79  | 157285    | PRAG1         | 0.12   | 0.42    | 1.8073549 | 0.001994658 |
| 80  | 1903      | S1PR3         | 0.4    | 1.39    | 1.797013  | 2.28E-08    |
| 81  | 107987373 | LOC107987373  | 6.44   | 22.01   | 1.7730266 | 6.05E-14    |
| 82  | 27242     | TNFRSF21      | 0.52   | 1.77    | 1.7671658 | 3.38E-06    |
| 83  | 166929    | SGMS2         | 0.08   | 0.27    | 1.7548875 | 0.007025075 |
| 84  | 26468     | LHX6          | 0.33   | 1.11    | 1.7500217 | 1.19E-04    |
| 85  | 8313      | AXIN2         | 0.09   | 0.3     | 1.7369656 | 0.026732153 |
| 86  | 4072      | EPCAM         | 1.58   | 5.24    | 1.7296423 | 3.34E-09    |
| 87  | 116211    | TM4SF19       | 0.4    | 1.32    | 1.722466  | 0.042549068 |
| 88  | 645051    | GAGE13        | 12.8   | 42.12   | 1.7183616 | 8.20E-15    |
| 89  | 6899      | TBX1          | 0.77   | 2.51    | 1.704757  | 3.24E-06    |
| 90  | 57477     | SHROOM4       | 0.08   | 0.26    | 1.7004397 | 0.005557601 |
| 91  | 7368      | UGT8          | 0.34   | 1.09    | 1.6807215 | 5.85E-06    |
| 92  | 10953     | TOMM34        | 10.22  | 32.72   | 1.6787776 | 7.93E-69    |
| 93  | 55150     | C19orf73      | 0.86   | 2.75    | 1.6770231 | 0.024795113 |
| 94  | 23678     | SGK3          | 0.27   | 0.86    | 1.6713773 | 5.43E-05    |
| 95  | 116832    | RPL39L        | 2.49   | 7.92    | 1.6693547 | 4.74E-05    |
| 96  | 10893     | MMP24         | 0.34   | 1.08    | 1.6674247 | 2.64E-06    |
| 97  | 112268271 | LOC112268271  | 0.06   | 0.19    | 1.662965  | 0.016735658 |
| 98  | 5621      | PRNP          | 0.96   | 3.03    | 1.6582115 | 1.53E-08    |
| 99  | 79605     | PGBD5         | 0.21   | 0.66    | 1.6520767 | 2.77E-09    |
| 100 | 641455    | POTEM         | 0.07   | 0.22    | 1.6520767 | 0.022656893 |
| 101 | 102723631 | CT45A10       | 2.28   | 7.09    | 1.6367518 | 2.43E-08    |
| 102 | 55630     | SLC39A4       | 12     | 37.13   | 1.6295509 | 8.35E-20    |
| 103 | 110354863 | ZNF660-ZNF197 | 0.54   | 1.67    | 1.6288168 | 7.51E-22    |
| 104 | 8187      | ZNF239        | 0.45   | 1.39    | 1.627088  | 2.84E-04    |
| 105 | 956       | ENTPD3        | 0.14   | 0.43    | 1.6189098 | 0.011881103 |
| 106 | 25907     | TMEM158       | 7.05   | 21.48   | 1.6072988 | 5.97E-39    |
| 107 | 27440     | HDHD5         | 2.03   | 6.17    | 1.6037908 | 1.96E-11    |
| 108 | 5575      | PRKAR1B       | 1.43   | 4.32    | 1.5950162 | 1.97E-11    |
| 109 | 114108587 | ATF7-NPFF     | 0.49   | 1.48    | 1.5947435 | 0.003828406 |
| 110 | 23413     | NCS1          | 0.51   | 1.54    | 1.5943612 | 2.06E-09    |
| 111 | 7166      | TPH1          | 0.1    | 0.3     | 1.5849625 | 0.032859222 |
| 112 | 80070     | ADAMTS20      | 0.09   | 0.27    | 1.5849625 | 0.014164299 |
| 113 | 7227      | TRPS1         | 0.08   | 0.24    | 1.5849625 | 0.002413872 |
| 114 | 7262      | PHLDA2        | 2.79   | 8.35    | 1.5815111 | 9.93E-07    |
| 115 | 120071    | LARGE2        | 0.49   | 1.46    | 1.5751147 | 3.13E-04    |
| 116 | 55600     | ITLN1         | 17.64  | 52.34   | 1.5690634 | 5.91E-54    |
| 117 | 84634     | KISS1R        | 2.78   | 8.24    | 1.5675595 | 6.34E-13    |
| 118 | 2100      | ESR2          | 0.19   | 0.56    | 1.5594274 | 0.032507286 |
| 119 | 9615      | GDA           | 0.66   | 1.94    | 1.5555187 | 2.99E-07    |

|     |           |            |         |         |           |             |
|-----|-----------|------------|---------|---------|-----------|-------------|
| 120 | 130340    | AP1S3      | 0.16    | 0.47    | 1.5545889 | 0.012845651 |
| 121 | 5727      | PTCH1      | 0.16    | 0.47    | 1.5545889 | 0.002770947 |
| 122 | 79887     | PLBD1      | 1.03    | 3       | 1.5423182 | 3.38E-06    |
| 123 | 268       | AMH        | 0.39    | 1.13    | 1.5347767 | 0.012843162 |
| 124 | 547       | KIF1A      | 2.08    | 6.01    | 1.5307815 | 4.06E-57    |
| 125 | 2260      | FGFR1      | 0.17    | 0.49    | 1.527247  | 0.004090594 |
| 126 | 5744      | PTHLH      | 0.25    | 0.72    | 1.5260688 | 0.028171503 |
| 127 | 282763    | OR51B5     | 1.36    | 3.91    | 1.523562  | 1.23E-05    |
| 128 | 389432    | SAMD5      | 0.59    | 1.69    | 1.5182364 | 1.16E-11    |
| 129 | 81552     | VOPP1      | 1.24    | 3.55    | 1.5174789 | 8.23E-11    |
| 130 | 4685      | NCAM2      | 0.6     | 1.71    | 1.5109619 | 1.70E-04    |
| 131 | 100533467 | BIVM-ERCC5 | 0.53    | 1.51    | 1.5104843 | 1.83E-08    |
| 132 | 643988    | FNDC10     | 0.72    | 2.04    | 1.5025003 | 1.12E-04    |
| 133 | 10332     | CLEC4M     | 0.6     | 1.7     | 1.5025003 | 0.001265603 |
| 134 | 221711    | SYCP2L     | 0.36    | 1.02    | 1.5025003 | 0.00126592  |
| 135 | 23034     | SAMD4A     | 0.12    | 0.34    | 1.5025003 | 0.006453695 |
| 136 | 142683    | ITLN2      | 4.07    | 11.5    | 1.4985332 | 2.21E-11    |
| 137 | 23224     | SYNE2      | 0.34    | 0.96    | 1.4974997 | 4.12E-04    |
| 138 | 57211     | ADGRG6     | 0.11    | 0.31    | 1.4947647 | 0.007209423 |
| 139 | 1829      | DSG2       | 1.36    | 3.79    | 1.4785912 | 1.28E-20    |
| 140 | 8412      | BCAR3      | 0.18    | 0.5     | 1.4739312 | 0.029423595 |
| 141 | 83987     | CCDC8      | 0.84    | 2.33    | 1.4718687 | 8.69E-08    |
| 142 | 10360     | NPM3       | 25.82   | 71.5    | 1.4694542 | 9.66E-44    |
| 143 | 730394    | GTF2H2C_2  | 2.51    | 6.94    | 1.4672483 | 6.65E-11    |
| 144 | 145282    | MIPOL1     | 0.17    | 0.47    | 1.467126  | 0.004452168 |
| 145 | 54734     | RAB39A     | 0.46    | 1.27    | 1.4651227 | 0.007207938 |
| 146 | 254528    | MEIOB      | 3.95    | 10.9    | 1.4644036 | 3.47E-18    |
| 147 | 29948     | OSGIN1     | 0.89    | 2.45    | 1.4609045 | 9.13E-05    |
| 148 | 4585      | MUC4       | 0.04    | 0.11    | 1.4594316 | 0.007188376 |
| 149 | 7291      | TWIST1     | 0.69    | 1.89    | 1.453718  | 0.002577578 |
| 150 | 286077    | FAM83H     | 1.44    | 3.94    | 1.4521268 | 1.03E-21    |
| 151 | 729428    | GAGE12B    | 53.59   | 146.21  | 1.4480063 | 2.14E-27    |
| 152 | 55605     | KIF21A     | 1.22    | 3.32    | 1.4443021 | 3.55E-20    |
| 153 | 246721    | POLR2J2    | 1.76    | 4.73    | 1.4262648 | 1.84E-08    |
| 154 | 2543      | GAGE1      | 34.34   | 92.18   | 1.4245637 | 1.63E-28    |
| 155 | 6583      | SLC22A4    | 0.44    | 1.18    | 1.4232114 | 0.012933174 |
| 156 | 221002    | RASGEF1A   | 1.06    | 2.84    | 1.4218267 | 9.72E-08    |
| 157 | 7205      | TRIP6      | 4.15    | 11.11   | 1.4206756 | 9.38E-16    |
| 158 | 10874     | NMU        | 12.99   | 34.68   | 1.4167025 | 5.68E-18    |
| 159 | 2195      | FAT1       | 0.26    | 0.69    | 1.4080847 | 4.10E-10    |
| 160 | 79969     | ATAT1      | 0.34    | 0.9     | 1.4043903 | 0.039246241 |
| 161 | 8612      | PLPP2      | 1.13    | 2.99    | 1.4038227 | 0.001837649 |
| 162 | 3039      | HBA1       | 1673.45 | 4418.79 | 1.4008259 | 0           |
| 163 | 666       | BOK        | 0.3     | 0.79    | 1.3968902 | 0.018422047 |
| 164 | 57105     | CYSLTR2    | 11.54   | 30.38   | 1.3964786 | 3.21E-127   |
| 165 | 6640      | SNTA1      | 1       | 2.63    | 1.3950628 | 1.48E-05    |
| 166 | 284358    | MAMSTR     | 0.59    | 1.55    | 1.3934814 | 0.035213263 |
| 167 | 8153      | RND2       | 0.16    | 0.42    | 1.3923174 | 0.026194858 |
| 168 | 284129    | SLC26A11   | 0.21    | 0.55    | 1.3890423 | 0.022660979 |
| 169 | 11135     | CDC42EP1   | 4.58    | 11.99   | 1.3884122 | 1.49E-21    |
| 170 | 115290    | FBXO17     | 0.83    | 2.17    | 1.3865118 | 1.04E-04    |
| 171 | 642778    | NPIPA3     | 2.67    | 6.98    | 1.3863873 | 5.20E-13    |
| 172 | 79012     | CAMKV      | 0.23    | 0.6     | 1.3833286 | 0.02619022  |
| 173 | 10045     | SH2D3A     | 0.51    | 1.33    | 1.3828571 | 0.005767774 |
| 174 | 27141     | CIDEB      | 3.38    | 8.81    | 1.3821188 | 2.29E-11    |
| 175 | 1690      | COCH       | 3.86    | 10.04   | 1.3790865 | 2.86E-23    |
| 176 | 23428     | SLC7A8     | 2.57    | 6.66    | 1.3737538 | 1.32E-17    |
| 177 | 3293      | HSD17B3    | 1.69    | 4.37    | 1.37061   | 4.63E-05    |
| 178 | 388722    | C1orf53    | 3.06    | 7.91    | 1.370146  | 0.004570392 |
| 179 | 220992    | ZNF485     | 0.45    | 1.16    | 1.3661279 | 0.005608911 |
| 180 | 50940     | PDE11A     | 0.07    | 0.18    | 1.3625701 | 0.026185584 |

|     |           |              |       |        |           |             |
|-----|-----------|--------------|-------|--------|-----------|-------------|
| 181 | 131540    | ZDHHC19      | 0.96  | 2.45   | 1.3516754 | 0.012935677 |
| 182 | 56675     | NRIP3        | 0.49  | 1.25   | 1.3510744 | 5.17E-05    |
| 183 | 6297      | SALL2        | 0.69  | 1.76   | 1.3509072 | 1.15E-07    |
| 184 | 91522     | COL23A1      | 0.55  | 1.4    | 1.3479233 | 4.12E-04    |
| 185 | 440590    | ZYG11A       | 0.57  | 1.45   | 1.3470191 | 4.74E-06    |
| 186 | 1595      | CYP51A1      | 3.61  | 9.15   | 1.3417729 | 7.79E-24    |
| 187 | 54478     | PIMREG       | 0.53  | 1.34   | 1.3381687 | 0.011416532 |
| 188 | 55228     | PNMA8A       | 1.22  | 3.08   | 1.3360492 | 6.45E-10    |
| 189 | 134549    | SHROOM1      | 2.75  | 6.92   | 1.3313404 | 1.68E-18    |
| 190 | 150221    | RIMBP3C      | 0.1   | 0.25   | 1.3219281 | 0.03286487  |
| 191 | 729447    | GAGE2A       | 49.92 | 124.41 | 1.3174126 | 2.39E-28    |
| 192 | 187       | APLNR        | 1.69  | 4.21   | 1.316797  | 1.20E-13    |
| 193 | 126626    | GABPB2       | 0.51  | 1.27   | 1.3162593 | 0.042091437 |
| 194 | 222234    | FAM185A      | 0.51  | 1.27   | 1.3162593 | 0.005145813 |
| 195 | 79746     | ECHDC3       | 0.99  | 2.46   | 1.3131579 | 0.002442021 |
| 196 | 2318      | FLNC         | 2.45  | 6.08   | 1.3112896 | 7.43E-47    |
| 197 | 94122     | SYTL5        | 0.27  | 0.67   | 1.3112017 | 0.002280113 |
| 198 | 114132    | SIGLEC11     | 0.21  | 0.52   | 1.3081223 | 0.04675624  |
| 199 | 54898     | ELOVL2       | 0.38  | 0.94   | 1.3066613 | 0.002933759 |
| 200 | 63917     | GALNT11      | 1.4   | 3.46   | 1.3053452 | 9.23E-08    |
| 201 | 1675      | CFD          | 1.53  | 3.78   | 1.3048546 | 0.001129631 |
| 202 | 100996928 | FMC1-LUC7L2  | 3.67  | 9.04   | 1.3005427 | 1.61E-19    |
| 203 | 7133      | TNFRSF1B     | 1.08  | 2.66   | 1.3003949 | 4.28E-08    |
| 204 | 388591    | RNF207       | 0.24  | 0.59   | 1.2976805 | 0.011418774 |
| 205 | 51260     | PBDC1        | 2.57  | 6.31   | 1.2958716 | 1.42E-05    |
| 206 | 225689    | MAPK15       | 0.38  | 0.93   | 1.2912313 | 0.01642121  |
| 207 | 653067    | XAGE1B       | 2.29  | 5.59   | 1.2875007 | 0.02265281  |
| 208 | 23753     | SDF2L1       | 36.74 | 89.6   | 1.2861471 | 9.08E-41    |
| 209 | 84258     | SYT3         | 0.57  | 1.39   | 1.2860511 | 0.001282878 |
| 210 | 107984449 | LOC107984449 | 0.55  | 1.34   | 1.2847295 | 7.70E-04    |
| 211 | 126075    | CCDC159      | 1.45  | 3.53   | 1.2836153 | 0.001449306 |
| 212 | 23026     | MYO16        | 0.53  | 1.29   | 1.2833068 | 7.66E-08    |
| 213 | 4199      | ME1          | 2.64  | 6.42   | 1.2820354 | 2.44E-15    |
| 214 | 79948     | PLPPR3       | 0.63  | 1.53   | 1.2801079 | 0.001449665 |
| 215 | 9027      | NAT8         | 0.82  | 1.98   | 1.2718046 | 0.044840734 |
| 216 | 5241      | PGR          | 0.22  | 0.53   | 1.2684888 | 3.34E-06    |
| 217 | 9659      | PDE4DIP      | 13.88 | 33.41  | 1.2672724 | 6.25E-41    |
| 218 | 1645      | AKR1C1       | 4.2   | 10.1   | 1.2658941 | 1.16E-37    |
| 219 | 255738    | PCSK9        | 7.28  | 17.49  | 1.2645199 | 3.95E-48    |
| 220 | 3046      | HBE1         | 22.53 | 53.74  | 1.254149  | 3.87E-15    |
| 221 | 105379417 | LOC105379417 | 0.39  | 0.93   | 1.2537566 | 0.036821221 |
| 222 | 645073    | GAGE12G      | 27.04 | 64.34  | 1.2506208 | 4.68E-15    |
| 223 | 121355    | GTSF1        | 21.43 | 50.98  | 1.2502995 | 1.16E-21    |
| 224 | 138428    | PTRH1        | 2.59  | 6.16   | 1.2499783 | 2.26E-04    |
| 225 | 2519      | FUCA2        | 4.16  | 9.86   | 1.2450041 | 5.43E-17    |
| 226 | 56159     | TEX11        | 2.2   | 5.2    | 1.2410081 | 8.44E-13    |
| 227 | 9256      | TSPOAP1      | 0.22  | 0.52   | 1.2410081 | 7.66E-04    |
| 228 | 139135    | PASD1        | 0.64  | 1.51   | 1.2384047 | 3.78E-04    |
| 229 | 202243    | CCDC125      | 0.94  | 2.2    | 1.2267709 | 5.28E-06    |
| 230 | 23322     | RPGRIP1L     | 0.71  | 1.66   | 1.2252923 | 0.01853975  |
| 231 | 6795      | AURKC        | 0.93  | 2.17   | 1.2223924 | 0.03520727  |
| 232 | 4703      | NEB          | 0.06  | 0.14   | 1.2223924 | 7.16E-04    |
| 233 | 10815     | CPLX1        | 2.84  | 6.59   | 1.2143875 | 8.37E-10    |
| 234 | 323       | APBB2        | 0.44  | 1.02   | 1.2129937 | 1.64E-04    |
| 235 | 727940    | RHOXF2B      | 4.6   | 10.66  | 1.2125017 | 1.26E-08    |
| 236 | 22843     | PPM1E        | 0.19  | 0.44   | 1.2115041 | 0.009586954 |
| 237 | 2000      | ELF4         | 1.12  | 2.59   | 1.2094534 | 2.37E-07    |
| 238 | 1728      | NQO1         | 4.62  | 10.64  | 1.2035334 | 4.85E-18    |
| 239 | 668       | FOXL2        | 1.37  | 3.15   | 1.2011759 | 6.38E-07    |
| 240 | 59277     | NTN4         | 0.64  | 1.47   | 1.1996723 | 1.96E-04    |
| 241 | 4897      | NRCAM        | 1.13  | 2.59   | 1.1966293 | 7.86E-13    |

|     |           |          |        |        |           |             |
|-----|-----------|----------|--------|--------|-----------|-------------|
| 242 | 26010     | SPATS2L  | 2.55   | 5.84   | 1.1954711 | 9.45E-09    |
| 243 | 27077     | B9D1     | 0.97   | 2.22   | 1.194503  | 0.040455062 |
| 244 | 114793    | FMNL2    | 0.74   | 1.69   | 1.1914261 | 2.09E-07    |
| 245 | 84617     | TUBB6    | 18.86  | 43.07  | 1.1913536 | 7.21E-50    |
| 246 | 1958      | ERG1     | 28.75  | 65.46  | 1.1870516 | 5.35E-138   |
| 247 | 7580      | ZNF32    | 1.06   | 2.41   | 1.1849689 | 0.01391072  |
| 248 | 57713     | SFMBT2   | 0.3    | 0.68   | 1.1805722 | 1.50E-04    |
| 249 | 56999     | ADAMTS9  | 0.36   | 0.81   | 1.169925  | 6.68E-05    |
| 250 | 5169      | ENPP3    | 3      | 6.74   | 1.1677861 | 2.48E-14    |
| 251 | 7082      | TJP1     | 0.74   | 1.66   | 1.1655861 | 1.03E-09    |
| 252 | 203859    | ANO5     | 0.37   | 0.83   | 1.1655861 | 2.04E-04    |
| 253 | 27443     | CECR2    | 0.33   | 0.74   | 1.1650592 | 2.22E-05    |
| 254 | 220929    | ZNF438   | 0.59   | 1.32   | 1.1617511 | 0.0124293   |
| 255 | 2017      | CTTN     | 6.25   | 13.92  | 1.1552311 | 2.45E-26    |
| 256 | 5010      | CLDN11   | 2.21   | 4.92   | 1.1546119 | 3.14E-09    |
| 257 | 4920      | ROR2     | 1.79   | 3.98   | 1.1528088 | 7.91E-14    |
| 258 | 3170      | FOXA2    | 0.94   | 2.09   | 1.1527703 | 6.43E-04    |
| 259 | 1016      | CDH18    | 0.63   | 1.4    | 1.1520031 | 1.47E-04    |
| 260 | 57698     | SHTN1    | 1.13   | 2.51   | 1.1513646 | 2.93E-08    |
| 261 | 6723      | SRM      | 110.29 | 244.85 | 1.1505962 | 6.97E-166   |
| 262 | 348645    | C22orf34 | 0.82   | 1.82   | 1.1502426 | 5.73E-04    |
| 263 | 140690    | CTCF     | 6.15   | 13.64  | 1.1491853 | 3.76E-23    |
| 264 | 3856      | KRT8     | 16.97  | 37.63  | 1.1488967 | 9.82E-40    |
| 265 | 5802      | PTPRS    | 1.24   | 2.74   | 1.1438358 | 8.12E-14    |
| 266 | 65268     | WNK2     | 0.44   | 0.97   | 1.1404812 | 6.73E-06    |
| 267 | 54873     | PALMD    | 1.98   | 4.35   | 1.135515  | 8.40E-07    |
| 268 | 64856     | VWA1     | 0.21   | 0.46   | 1.1312445 | 0.040461796 |
| 269 | 727837    | SSX2B    | 1.12   | 2.45   | 1.129283  | 0.014548264 |
| 270 | 3304      | HSPA1B   | 31.6   | 69     | 1.1266718 | 8.40E-105   |
| 271 | 400916    | CHCHD10  | 89.88  | 195.95 | 1.1244135 | 5.01E-55    |
| 272 | 51700     | CYB5R2   | 2.28   | 4.97   | 1.124212  | 0.00198757  |
| 273 | 84261     | FBXW9    | 3.17   | 6.9    | 1.1221135 | 3.22E-07    |
| 274 | 4053      | LTBP2    | 0.3    | 0.65   | 1.1154772 | 3.28E-04    |
| 275 | 57085     | AGTRAP   | 5.22   | 11.28  | 1.1116454 | 3.70E-07    |
| 276 | 348       | APOE     | 70.25  | 151.56 | 1.1093189 | 1.82E-88    |
| 277 | 1982      | EIF4G2   | 108.17 | 232.92 | 1.1065341 | 0           |
| 278 | 3858      | KRT10    | 9.57   | 20.58  | 1.1046522 | 1.28E-25    |
| 279 | 55502     | HES6     | 14.14  | 30.32  | 1.1004876 | 7.20E-22    |
| 280 | 65263     | PYCR3    | 3.36   | 7.18   | 1.0955226 | 9.85E-15    |
| 281 | 79339     | OR51B4   | 2.74   | 5.85   | 1.0942607 | 0.003147524 |
| 282 | 163154    | PRR22    | 0.85   | 1.81   | 1.090455  | 0.046858298 |
| 283 | 8572      | PDLIM4   | 1.53   | 3.24   | 1.0824622 | 1.07E-04    |
| 284 | 7923      | HSD17B8  | 1.9    | 4.02   | 1.0811961 | 0.01497693  |
| 285 | 4301      | AFDN     | 2.02   | 4.26   | 1.0764981 | 1.14E-20    |
| 286 | 91523     | PCED1B   | 3.8    | 8      | 1.0740006 | 4.81E-10    |
| 287 | 9096      | TBX18    | 1.21   | 2.54   | 1.0698214 | 9.02E-05    |
| 288 | 8091      | HMGA2    | 2.32   | 4.86   | 1.0668315 | 3.33E-08    |
| 289 | 89874     | SLC25A21 | 0.95   | 1.99   | 1.066769  | 0.006960269 |
| 290 | 145781    | GCOM1    | 0.22   | 0.46   | 1.0641303 | 0.019106651 |
| 291 | 55805     | LRP2BP   | 0.22   | 0.46   | 1.0641303 | 0.017109409 |
| 292 | 10553     | HTATIP2  | 5.26   | 10.96  | 1.0591131 | 4.54E-08    |
| 293 | 653220    | XAGE1A   | 29.94  | 62.25  | 1.0559996 | 8.43E-09    |
| 294 | 102724231 | C3orf86  | 3.47   | 7.21   | 1.0550636 | 0.005524984 |
| 295 | 655       | BMP7     | 0.39   | 0.81   | 1.0544478 | 0.009735833 |
| 296 | 80303     | EFHD1    | 1.52   | 3.15   | 1.0512805 | 4.34E-04    |
| 297 | 26270     | FBXO6    | 1.66   | 3.44   | 1.0512253 | 0.005463119 |
| 298 | 5578      | PRKCA    | 0.83   | 1.72   | 1.0512253 | 1.54E-09    |
| 299 | 6708      | SPTA1    | 2.64   | 5.47   | 1.0510029 | 3.50E-26    |
| 300 | 3880      | KRT19    | 15.06  | 31.19  | 1.0503618 | 2.43E-21    |
| 301 | 10675     | CSPG5    | 0.57   | 1.18   | 1.049753  | 0.035369836 |
| 302 | 2247      | FGF2     | 0.29   | 0.6    | 1.0489096 | 0.002369635 |

|     |        |          |       |        |           |             |
|-----|--------|----------|-------|--------|-----------|-------------|
| 303 | 81848  | SPRY4    | 1.03  | 2.13   | 1.0482091 | 1.03E-06    |
| 304 | 10321  | CRISP3   | 3.25  | 6.7    | 1.0437214 | 2.99E-08    |
| 305 | 54587  | MXRA8    | 1.21  | 2.49   | 1.0411387 | 0.002158932 |
| 306 | 9143   | SYNGR3   | 3.79  | 7.79   | 1.0394255 | 9.71E-09    |
| 307 | 56288  | PARD3    | 1.32  | 2.71   | 1.0377549 | 4.51E-06    |
| 308 | 150223 | YDJC     | 55.78 | 114.17 | 1.0333638 | 3.88E-60    |
| 309 | 347733 | TUBB2B   | 0.88  | 1.8    | 1.0324215 | 0.012992565 |
| 310 | 63035  | BCORL1   | 0.27  | 0.55   | 1.0264722 | 0.002738216 |
| 311 | 92840  | REEP6    | 48.95 | 99.63  | 1.0252714 | 1.67E-62    |
| 312 | 79366  | HMG5     | 17.07 | 34.71  | 1.0238883 | 6.87E-37    |
| 313 | 114804 | RNF157   | 0.85  | 1.72   | 1.0168738 | 3.35E-05    |
| 314 | 378708 | CENPS    | 9.29  | 18.74  | 1.0123705 | 2.12E-07    |
| 315 | 200879 | LIPH     | 2.94  | 5.89   | 1.0024515 | 2.16E-11    |
| 316 | 84883  | AIFM2    | 1.24  | 2.48   | 1         | 6.09E-05    |
| 317 | 653269 | POTE1    | 0.17  | 0.34   | 1         | 0.046531213 |
| 318 | 121268 | RHEBL1   | 7.6   | 3.8    | -1        | 1.17E-04    |
| 319 | 81794  | ADAMTS10 | 1.32  | 0.66   | -1        | 0.002879208 |
| 320 | 57524  | CASKIN1  | 0.8   | 0.4    | -1        | 0.011336306 |
| 321 | 57480  | PLEKHG1  | 0.34  | 0.17   | -1        | 0.033948014 |
| 322 | 9379   | NRXN2    | 7.21  | 3.6    | -1.002002 | 2.80E-20    |
| 323 | 126014 | OSCAR    | 4.05  | 2.02   | -1.003567 | 1.07E-04    |
| 324 | 26051  | PPP1R16B | 16.52 | 8.23   | -1.005249 | 1.78E-56    |
| 325 | 5629   | PROX1    | 1.43  | 0.71   | -1.010124 | 4.95E-07    |
| 326 | 143162 | FRMPD2   | 1.17  | 0.58   | -1.012384 | 0.049325482 |
| 327 | 57835  | SLC4A5   | 1.07  | 0.53   | -1.013547 | 0.006482409 |
| 328 | 25791  | NGEF     | 2.04  | 1.01   | -1.014214 | 0.004616914 |
| 329 | 79187  | FSD1     | 11.15 | 5.52   | -1.014304 | 1.30E-10    |
| 330 | 10867  | TSPAN9   | 19.05 | 9.43   | -1.014461 | 1.30E-44    |
| 331 | 114783 | LMTK3    | 1.54  | 0.76   | -1.018859 | 4.49E-05    |
| 332 | 339327 | ZNF546   | 1.54  | 0.76   | -1.018859 | 1.28E-07    |
| 333 | 8302   | KLRC4    | 2.76  | 1.36   | -1.021062 | 0.048219075 |
| 334 | 10809  | STARD10  | 10.01 | 4.93   | -1.021782 | 1.06E-10    |
| 335 | 26579  | MYEOV    | 65.53 | 32.27  | -1.021962 | 2.52E-82    |
| 336 | 2206   | MS4A2    | 4.41  | 2.17   | -1.023084 | 2.65E-08    |
| 337 | 2701   | GJA4     | 6.77  | 3.33   | -1.023634 | 4.76E-06    |
| 338 | 388536 | ZNF790   | 1.83  | 0.9    | -1.023847 | 0.001567682 |
| 339 | 3695   | ITGB7    | 4.01  | 1.97   | -1.025407 | 1.26E-06    |
| 340 | 80763  | SPX      | 16.53 | 8.11   | -1.027313 | 4.68E-20    |
| 341 | 102    | ADAM10   | 94.47 | 46.25  | -1.030403 | 7.03E-275   |
| 342 | 6503   | SLA      | 4.23  | 2.07   | -1.031027 | 2.04E-07    |
| 343 | 55890  | GPRC5C   | 2.21  | 1.08   | -1.033015 | 0.011870379 |
| 344 | 941    | CD80     | 1.72  | 0.84   | -1.033947 | 0.002358482 |
| 345 | 2115   | ETV1     | 9.96  | 4.86   | -1.035189 | 3.63E-27    |
| 346 | 93589  | CACNA2D4 | 6.98  | 3.4    | -1.037692 | 2.72E-22    |
| 347 | 2047   | EPHB1    | 2.71  | 1.32   | -1.037755 | 7.86E-08    |
| 348 | 348094 | ANKDD1A  | 2.32  | 1.13   | -1.037802 | 1.04E-04    |
| 349 | 7473   | WNT3     | 1.87  | 0.91   | -1.0391   | 3.93E-04    |
| 350 | 30817  | ADGRE2   | 15.31 | 7.45   | -1.039162 | 9.42E-50    |
| 351 | 56901  | NDUFA4L2 | 5.2   | 2.53   | -1.039374 | 0.001105993 |
| 352 | 145864 | HAPLN3   | 27.36 | 13.26  | -1.044987 | 1.80E-27    |
| 353 | 3430   | IFI35    | 8.72  | 4.22   | -1.047085 | 1.17E-05    |
| 354 | 6571   | SLC18A2  | 22.43 | 10.81  | -1.053063 | 2.12E-49    |
| 355 | 64098  | PARVG    | 28.34 | 13.62  | -1.057113 | 1.63E-28    |
| 356 | 7305   | TYROBP   | 12.62 | 6.05   | -1.060705 | 0.00274731  |
| 357 | 3990   | LIPC     | 46.25 | 22.16  | -1.061495 | 1.35E-55    |
| 358 | 54498  | SMOX     | 18.08 | 8.63   | -1.066962 | 5.65E-21    |
| 359 | 84502  | JPH4     | 2.18  | 1.04   | -1.067745 | 2.50E-06    |
| 360 | 285852 | TREML4   | 1.95  | 0.93   | -1.068172 | 0.001451167 |
| 361 | 58472  | SQOR     | 1.7   | 0.81   | -1.069541 | 0.018509149 |
| 362 | 28514  | DLL1     | 1.47  | 0.7    | -1.070389 | 4.13E-04    |
| 363 | 8997   | KALRN    | 36.21 | 17.24  | -1.070628 | 1.65E-77    |

|     |        |            |        |       |           |             |
|-----|--------|------------|--------|-------|-----------|-------------|
| 364 | 283248 | RCOR2      | 3.93   | 1.87  | -1.071491 | 2.51E-07    |
| 365 | 26960  | NBEA       | 5.26   | 2.5   | -1.073135 | 1.47E-11    |
| 366 | 10501  | SEMA6B     | 2.76   | 1.31  | -1.075101 | 3.51E-07    |
| 367 | 23109  | DDN        | 3.9    | 1.85  | -1.075949 | 2.72E-09    |
| 368 | 79966  | SCD5       | 6.79   | 3.22  | -1.076351 | 5.94E-12    |
| 369 | 342184 | FMN1       | 0.55   | 0.26  | -1.08092  | 9.59E-05    |
| 370 | 974    | CD79B      | 3.96   | 1.87  | -1.082462 | 5.01E-04    |
| 371 | 26047  | CNTNAP2    | 0.36   | 0.17  | -1.082462 | 3.57E-05    |
| 372 | 8854   | ALDH1A2    | 1.95   | 0.92  | -1.083768 | 6.70E-05    |
| 373 | 597    | BCL2A1     | 4.06   | 1.91  | -1.087907 | 0.032976146 |
| 374 | 10791  | VAMP5      | 6.74   | 3.17  | -1.088266 | 0.0152608   |
| 375 | 2041   | EPHA1      | 13.23  | 6.2   | -1.093473 | 8.88E-27    |
| 376 | 4613   | MYCN       | 26.9   | 12.6  | -1.094182 | 2.97E-32    |
| 377 | 285590 | SH3PXD2B   | 2.78   | 1.3   | -1.096573 | 2.41E-14    |
| 378 | 11174  | ADAMTS6    | 0.77   | 0.36  | -1.096862 | 3.24E-04    |
| 379 | 2781   | GNAZ       | 3.13   | 1.46  | -1.100194 | 1.34E-05    |
| 380 | 81849  | ST6GALNAC5 | 1.61   | 0.75  | -1.102098 | 1.35E-06    |
| 381 | 81603  | TRIM8      | 130.12 | 60.48 | -1.105313 | 6.83E-216   |
| 382 | 11077  | HSF2BP     | 1.12   | 0.52  | -1.106915 | 0.027171255 |
| 383 | 84915  | FAM222A    | 4.61   | 2.14  | -1.107156 | 1.37E-10    |
| 384 | 10156  | RASA4      | 4.01   | 1.86  | -1.1083   | 8.37E-12    |
| 385 | 164045 | HFM1       | 0.69   | 0.32  | -1.108524 | 0.009750869 |
| 386 | 80237  | ELL3       | 1.23   | 0.57  | -1.109624 | 0.048211299 |
| 387 | 84249  | PSD2       | 1.23   | 0.57  | -1.109624 | 2.52E-04    |
| 388 | 5731   | PTGER1     | 3.41   | 1.58  | -1.109847 | 0.002026709 |
| 389 | 1043   | CD52       | 45.82  | 21.22 | -1.110553 | 4.54E-07    |
| 390 | 3215   | HOXB5      | 2.77   | 1.28  | -1.113742 | 0.001149389 |
| 391 | 26038  | CHD5       | 6.48   | 2.99  | -1.115848 | 4.59E-42    |
| 392 | 10202  | DHRS2      | 25.99  | 11.96 | -1.119739 | 1.51E-24    |
| 393 | 51761  | ATP8A2     | 0.5    | 0.23  | -1.120294 | 9.47E-04    |
| 394 | 90427  | BMF        | 6.67   | 3.06  | -1.124155 | 1.52E-20    |
| 395 | 50615  | IL21R      | 17.07  | 7.83  | -1.124379 | 6.28E-53    |
| 396 | 23098  | SARM1      | 0.24   | 0.11  | -1.125531 | 0.022437205 |
| 397 | 221468 | TMEM217    | 8.67   | 3.97  | -1.126893 | 1.09E-07    |
| 398 | 79844  | ZDHHC11    | 2.6    | 1.19  | -1.12755  | 6.21E-05    |
| 399 | 338761 | C1QL4      | 1.64   | 0.75  | -1.128733 | 0.007576382 |
| 400 | 6425   | SFRP5      | 1.75   | 0.8   | -1.129283 | 0.009184843 |
| 401 | 4987   | OPRL1      | 0.79   | 0.36  | -1.133856 | 0.016332199 |
| 402 | 8340   | H2BC13     | 10.3   | 4.68  | -1.138064 | 0.035239087 |
| 403 | 85508  | SCRT2      | 6.78   | 3.08  | -1.138355 | 2.14E-14    |
| 404 | 7852   | CXCR4      | 11.38  | 5.16  | -1.141058 | 8.47E-12    |
| 405 | 3566   | IL4R       | 23.27  | 10.54 | -1.142596 | 2.20E-50    |
| 406 | 3356   | HTR2A      | 0.84   | 0.38  | -1.14439  | 0.001568068 |
| 407 | 57103  | TIGAR      | 0.31   | 0.14  | -1.146841 | 0.011824855 |
| 408 | 1848   | DUSP6      | 47.37  | 21.36 | -1.149062 | 2.43E-113   |
| 409 | 340526 | RTL5       | 1.22   | 0.55  | -1.149378 | 2.86E-04    |
| 410 | 4059   | BCAM       | 11.64  | 5.23  | -1.154208 | 5.04E-22    |
| 411 | 57146  | TMEM159    | 7.46   | 3.35  | -1.155015 | 5.99E-08    |
| 412 | 57699  | CPNE5      | 8.93   | 4.01  | -1.155058 | 3.00E-13    |
| 413 | 342892 | ZNF850     | 2.63   | 1.18  | -1.156276 | 1.52E-14    |
| 414 | 5031   | P2RY6      | 0.96   | 0.43  | -1.158698 | 0.036934955 |
| 415 | 10335  | IRAG1      | 2.91   | 1.3   | -1.162508 | 4.23E-13    |
| 416 | 11145  | PLAAT3     | 6.83   | 3.05  | -1.163076 | 5.92E-05    |
| 417 | 89858  | SIGLEC12   | 21.33  | 9.52  | -1.16385  | 1.39E-31    |
| 418 | 1056   | CEL        | 2.74   | 1.22  | -1.167295 | 5.87E-05    |
| 419 | 353345 | GPR141     | 1.55   | 0.69  | -1.1676   | 1.60E-05    |
| 420 | 84867  | PTPN5      | 2.25   | 1     | -1.169925 | 2.40E-05    |
| 421 | 2811   | GP1BA      | 103.25 | 45.84 | -1.171463 | 1.64E-169   |
| 422 | 286527 | TMSB15B    | 6.5    | 2.88  | -1.174371 | 0.041021345 |
| 423 | 57060  | PCBP4      | 11.22  | 4.97  | -1.174755 | 5.23E-14    |
| 424 | 84620  | ST6GAL2    | 2.33   | 1.03  | -1.177686 | 3.33E-11    |

|     |           |               |       |       |           |             |
|-----|-----------|---------------|-------|-------|-----------|-------------|
| 425 | 100528030 | POC1B-GALNT4  | 1.38  | 0.61  | -1.177787 | 1.20E-05    |
| 426 | 6565      | SLC15A2       | 1.54  | 0.68  | -1.179324 | 2.98E-04    |
| 427 | 11247     | NXPH4         | 11.4  | 5.02  | -1.183275 | 2.06E-11    |
| 428 | 84649     | DGAT2         | 2.96  | 1.3   | -1.187086 | 1.73E-05    |
| 429 | 55799     | CACNA2D3      | 1.96  | 0.86  | -1.188445 | 5.92E-06    |
| 430 | 6569      | SLC34A1       | 9.87  | 4.33  | -1.188683 | 1.48E-16    |
| 431 | 57484     | RNF150        | 1.05  | 0.46  | -1.190684 | 2.28E-08    |
| 432 | 51177     | PLEKHO1       | 11.72 | 5.13  | -1.191942 | 8.01E-17    |
| 433 | 57493     | HEG1          | 2.13  | 0.93  | -1.195551 | 3.69E-15    |
| 434 | 54753     | ZNF853        | 0.62  | 0.27  | -1.199309 | 0.017271956 |
| 435 | 140706    | CCM2L         | 1.22  | 0.53  | -1.202817 | 0.006645225 |
| 436 | 388813    | LOC388813     | 3.71  | 1.61  | -1.204358 | 1.08E-04    |
| 437 | 8809      | IL18R1        | 3.35  | 1.45  | -1.208108 | 2.05E-08    |
| 438 | 84826     | SFT2D3        | 3.43  | 1.47  | -1.222392 | 5.13E-10    |
| 439 | 26137     | ZBTB20        | 0.28  | 0.12  | -1.222392 | 6.38E-07    |
| 440 | 285513    | GPRIN3        | 0.21  | 0.09  | -1.222392 | 0.012615043 |
| 441 | 28232     | SLCO3A1       | 35.85 | 15.33 | -1.225615 | 7.63E-88    |
| 442 | 222950    | NYAP1         | 1.03  | 0.44  | -1.227069 | 0.001985773 |
| 443 | 333926    | PPM1J         | 3.12  | 1.33  | -1.23012  | 2.75E-04    |
| 444 | 51301     | GCNT4         | 0.47  | 0.2   | -1.232661 | 0.017275179 |
| 445 | 8778      | SIGLEC5       | 3.06  | 1.3   | -1.23502  | 1.08E-05    |
| 446 | 576       | ADGRB2        | 2.59  | 1.1   | -1.235449 | 1.02E-09    |
| 447 | 116       | ADCYAP1       | 2.31  | 0.98  | -1.237039 | 6.39E-06    |
| 448 | 57514     | ARHGAP31      | 1.18  | 0.5   | -1.238787 | 1.44E-06    |
| 449 | 109504726 | ERV3-1-ZNF117 | 1.68  | 0.71  | -1.24257  | 2.09E-11    |
| 450 | 960       | CD44          | 55.06 | 23.22 | -1.245637 | 4.61E-144   |
| 451 | 1687      | GSDME         | 0.95  | 0.4   | -1.247928 | 0.010607947 |
| 452 | 100130311 | C17orf107     | 1.31  | 0.55  | -1.252063 | 6.95E-04    |
| 453 | 4081      | MAB21L1       | 5.41  | 2.27  | -1.252936 | 3.47E-12    |
| 454 | 2920      | CXCL2         | 7.64  | 3.2   | -1.255501 | 5.47E-06    |
| 455 | 55450     | CAMK2N1       | 9.24  | 3.87  | -1.255559 | 4.82E-16    |
| 456 | 26974     | ZNF285        | 0.55  | 0.23  | -1.257798 | 0.002871268 |
| 457 | 84868     | HAVCR2        | 0.79  | 0.33  | -1.259387 | 0.04458711  |
| 458 | 3770      | KCNJ14        | 0.6   | 0.25  | -1.263034 | 0.014910666 |
| 459 | 27143     | PALD1         | 0.36  | 0.15  | -1.263034 | 0.04457981  |
| 460 | 339488    | TFAP2E        | 2.24  | 0.93  | -1.268196 | 3.44E-07    |
| 461 | 10991     | SLC38A3       | 0.7   | 0.29  | -1.271302 | 0.021698266 |
| 462 | 84958     | SYTL1         | 5.75  | 2.38  | -1.2726   | 7.23E-09    |
| 463 | 201181    | ZNF385C       | 3.02  | 1.25  | -1.27262  | 2.59E-07    |
| 464 | 492307    | PPDPFL        | 16.13 | 6.67  | -1.273988 | 3.73E-14    |
| 465 | 112476    | PRRT2         | 8.7   | 3.59  | -1.277032 | 1.34E-19    |
| 466 | 9436      | NCR2          | 2.67  | 1.1   | -1.279336 | 0.004274216 |
| 467 | 9098      | USP6          | 0.73  | 0.3   | -1.282934 | 2.36E-05    |
| 468 | 3730      | ANOS1         | 0.56  | 0.23  | -1.283793 | 0.001708647 |
| 469 | 8530      | CST7          | 2.82  | 1.15  | -1.294061 | 0.026175946 |
| 470 | 79861     | TUBAL3        | 14.6  | 5.95  | -1.295007 | 1.50E-19    |
| 471 | 4638      | MYLK          | 17.89 | 7.29  | -1.295163 | 8.56E-55    |
| 472 | 11033     | ADAP1         | 6.21  | 2.53  | -1.295456 | 4.67E-11    |
| 473 | 8516      | ITGA8         | 1.99  | 0.81  | -1.296775 | 5.60E-08    |
| 474 | 1571      | CYP2E1        | 5.07  | 2.06  | -1.299341 | 7.79E-07    |
| 475 | 7177      | TPSAB1        | 16.64 | 6.76  | -1.29956  | 2.44E-13    |
| 476 | 100527943 | TGIF2-RAB5IF  | 1.97  | 0.8   | -1.300124 | 0.021953361 |
| 477 | 51738     | GHRL          | 1.11  | 0.45  | -1.302563 | 0.031539051 |
| 478 | 3026      | HABP2         | 0.99  | 0.4   | -1.307429 | 0.004275153 |
| 479 | 9915      | ARNT2         | 4.39  | 1.77  | -1.310472 | 2.71E-24    |
| 480 | 57057     | TBX20         | 1.39  | 0.56  | -1.311586 | 0.003137238 |
| 481 | 51171     | HSD17B14      | 4.3   | 1.73  | -1.313565 | 0.001027245 |
| 482 | 10855     | HPSE          | 6.62  | 2.65  | -1.320839 | 1.24E-25    |
| 483 | 7730      | ZNF177        | 1.2   | 0.48  | -1.321928 | 0.003605709 |
| 484 | 27185     | DISC1         | 4.02  | 1.6   | -1.329124 | 1.92E-21    |
| 485 | 90273     | CEACAM21      | 1.66  | 0.66  | -1.330645 | 0.012696578 |



|     |           |              |       |       |           |             |
|-----|-----------|--------------|-------|-------|-----------|-------------|
| 486 | 6866      | TAC3         | 34.22 | 13.59 | -1.332294 | 6.06E-17    |
| 487 | 375775    | PNPLA7       | 0.53  | 0.21  | -1.335603 | 0.006139095 |
| 488 | 9469      | CHST3        | 0.48  | 0.19  | -1.337035 | 0.00123536  |
| 489 | 57168     | ASPHD2       | 0.76  | 0.3   | -1.341037 | 0.005146116 |
| 490 | 2213      | FCGR2B       | 2.94  | 1.16  | -1.341691 | 5.48E-05    |
| 491 | 89822     | KCNK17       | 2.46  | 0.97  | -1.342602 | 0.001479997 |
| 492 | 220164    | DOK6         | 0.23  | 0.09  | -1.353637 | 0.021694331 |
| 493 | 8787      | RGS9         | 34.47 | 13.48 | -1.354521 | 1.23E-75    |
| 494 | 85407     | NKD1         | 1.14  | 0.44  | -1.373458 | 2.66E-18    |
| 495 | 2251      | FGF6         | 3.45  | 1.33  | -1.37517  | 6.22E-08    |
| 496 | 400745    | SH2D5        | 0.96  | 0.37  | -1.375509 | 5.83E-04    |
| 497 | 57156     | TMEM63C      | 0.26  | 0.1   | -1.378512 | 0.045366682 |
| 498 | 2620      | GAS2         | 1.12  | 0.43  | -1.38109  | 0.010610048 |
| 499 | 7474      | WNT5A        | 4.04  | 1.55  | -1.382087 | 1.86E-21    |
| 500 | 339541    | ARMH1        | 2.98  | 1.14  | -1.386279 | 1.91E-05    |
| 501 | 58512     | DLGAP3       | 1.1   | 0.42  | -1.389042 | 8.37E-05    |
| 502 | 4883      | NPR3         | 3.51  | 1.34  | -1.389238 | 1.89E-23    |
| 503 | 100170229 | SRRM5        | 0.63  | 0.24  | -1.392317 | 0.045359284 |
| 504 | 946       | SIGLEC6      | 56.09 | 21.36 | -1.392832 | 3.21E-150   |
| 505 | 639       | PRDM1        | 0.92  | 0.35  | -1.394279 | 8.27E-05    |
| 506 | 9619      | ABCG1        | 15.32 | 5.82  | -1.396325 | 5.19E-47    |
| 507 | 10220     | GDF11        | 36.71 | 13.93 | -1.397978 | 5.58E-230   |
| 508 | 101928589 | LOC101928589 | 6.09  | 2.31  | -1.398549 | 2.71E-10    |
| 509 | 5027      | P2RX7        | 0.95  | 0.36  | -1.399931 | 4.01E-05    |
| 510 | 973       | CD79A        | 8.01  | 3.03  | -1.402484 | 3.56E-07    |
| 511 | 4902      | NRTN         | 2.65  | 1     | -1.405992 | 0.00245246  |
| 512 | 56956     | LHX9         | 1.38  | 0.52  | -1.408085 | 1.56E-05    |
| 513 | 101928095 | LOC101928095 | 0.69  | 0.26  | -1.408085 | 0.025203105 |
| 514 | 1413      | CRYBA4       | 11.86 | 4.45  | -1.414227 | 5.21E-07    |
| 515 | 4978      | OPCML        | 0.4   | 0.15  | -1.415037 | 0.002994724 |
| 516 | 254173    | TLL10        | 0.94  | 0.35  | -1.425306 | 0.01512831  |
| 517 | 3135      | HLA-G        | 6.96  | 2.59  | -1.426135 | 1.39E-04    |
| 518 | 100532731 | COMMD3-BMI1  | 7.07  | 2.62  | -1.432143 | 1.70E-22    |
| 519 | 85329     | LGALS12      | 7.17  | 2.65  | -1.435981 | 8.81E-11    |
| 520 | 5971      | RELB         | 16.62 | 6.12  | -1.441317 | 8.83E-33    |
| 521 | 23764     | MAFF         | 13.34 | 4.91  | -1.441964 | 1.05E-28    |
| 522 | 256126    | SYCE2        | 2.56  | 0.94  | -1.445411 | 0.008038519 |
| 523 | 5287      | PIK3C2B      | 0.82  | 0.3   | -1.450661 | 8.15E-06    |
| 524 | 102723360 | LOC102723360 | 0.41  | 0.15  | -1.450661 | 3.46E-06    |
| 525 | 8736      | MYOM1        | 0.41  | 0.15  | -1.450661 | 0.005017897 |
| 526 | 90993     | CREB3L1      | 5.92  | 2.16  | -1.454566 | 4.50E-15    |
| 527 | 6271      | S100A1       | 31.24 | 11.31 | -1.465796 | 3.98E-10    |
| 528 | 114784    | CSMD2        | 2.57  | 0.93  | -1.466466 | 1.05E-33    |
| 529 | 89790     | SIGLEC10     | 2.05  | 0.74  | -1.470027 | 1.89E-04    |
| 530 | 1513      | CTSK         | 1.83  | 0.66  | -1.471306 | 0.002451887 |
| 531 | 10085     | EDIL3        | 1.11  | 0.4   | -1.472488 | 7.58E-06    |
| 532 | 9498      | SLC4A8       | 1.61  | 0.58  | -1.472936 | 1.83E-07    |
| 533 | 54852     | PAQR5        | 1.59  | 0.57  | -1.479993 | 4.75E-04    |
| 534 | 5592      | PRKG1        | 0.31  | 0.11  | -1.494765 | 0.006960643 |
| 535 | 5791      | PTPRE        | 1.16  | 0.41  | -1.500429 | 0.002548446 |
| 536 | 170082    | TCEANC       | 0.68  | 0.24  | -1.5025   | 0.00591238  |
| 537 | 389840    | MAP3K15      | 2.05  | 0.72  | -1.509555 | 2.14E-10    |
| 538 | 57191     | VN1R1        | 1.14  | 0.4   | -1.510962 | 0.021346453 |
| 539 | 4050      | LTB          | 9.52  | 3.34  | -1.511113 | 4.41E-07    |
| 540 | 3655      | ITGA6        | 2.71  | 0.95  | -1.512293 | 1.05E-16    |
| 541 | 51555     | PEX5L        | 0.2   | 0.07  | -1.514573 | 0.005464337 |
| 542 | 4804      | NGFR         | 1.35  | 0.47  | -1.522227 | 2.52E-05    |
| 543 | 5792      | PTPRF        | 9.07  | 3.15  | -1.525751 | 3.78E-72    |
| 544 | 1464      | CSPG4        | 0.75  | 0.26  | -1.528379 | 1.70E-07    |
| 545 | 375190    | FAM228B      | 1.1   | 0.38  | -1.533432 | 0.044156171 |
| 546 | 57408     | LRTM1        | 2.61  | 0.9   | -1.536053 | 3.73E-04    |

|     |        |          |       |       |           |             |
|-----|--------|----------|-------|-------|-----------|-------------|
| 547 | 602    | BCL3     | 56.64 | 19.49 | -1.539087 | 7.27E-102   |
| 548 | 53347  | UBASH3A  | 14.97 | 5.15  | -1.53943  | 2.71E-33    |
| 549 | 29108  | PYCARD   | 3.5   | 1.2   | -1.544321 | 0.012220466 |
| 550 | 389084 | SNORC    | 1.4   | 0.48  | -1.544321 | 1.71E-06    |
| 551 | 285180 | RUFY4    | 0.38  | 0.13  | -1.547488 | 0.009103217 |
| 552 | 2735   | GLI1     | 0.47  | 0.16  | -1.554589 | 0.021342576 |
| 553 | 83716  | CRISPLD2 | 1.09  | 0.37  | -1.558731 | 1.19E-07    |
| 554 | 440730 | TRIM67   | 0.77  | 0.26  | -1.566347 | 2.89E-07    |
| 555 | 5551   | PRF1     | 14.89 | 5.01  | -1.571461 | 1.29E-38    |
| 556 | 54039  | PCBP3    | 1.17  | 0.39  | -1.584963 | 0.002899138 |
| 557 | 2015   | ADGRE1   | 0.51  | 0.17  | -1.584963 | 0.012723276 |
| 558 | 169792 | GLIS3    | 0.39  | 0.13  | -1.584963 | 0.003563785 |
| 559 | 642799 | NPIPA2   | 9.58  | 3.16  | -1.600101 | 9.42E-29    |
| 560 | 83483  | PLVAP    | 18.22 | 6     | -1.602489 | 1.33E-43    |
| 561 | 91584  | PLXNA4   | 4.11  | 1.35  | -1.606179 | 4.15E-60    |
| 562 | 89927  | BMERB1   | 17.03 | 5.58  | -1.609741 | 1.45E-37    |
| 563 | 1240   | CMKLR1   | 0.58  | 0.19  | -1.610053 | 3.37E-04    |
| 564 | 54492  | NEURL1B  | 1.8   | 0.58  | -1.633872 | 1.12E-13    |
| 565 | 26212  | OR2B6    | 2.4   | 0.77  | -1.640104 | 0.00955482  |
| 566 | 5837   | PYGM     | 0.53  | 0.17  | -1.640458 | 0.031416298 |
| 567 | 57449  | PLEKHG5  | 2.78  | 0.89  | -1.643208 | 3.52E-14    |
| 568 | 25960  | ADGRA2   | 2.8   | 0.89  | -1.65355  | 6.53E-24    |
| 569 | 971    | CD72     | 1.92  | 0.61  | -1.654225 | 0.001032745 |
| 570 | 8913   | CACNA1G  | 1.89  | 0.6   | -1.655352 | 8.27E-19    |
| 571 | 85414  | SLC45A3  | 43.08 | 13.57 | -1.666598 | 1.10E-167   |
| 572 | 3553   | IL1B     | 92.11 | 29    | -1.667305 | 1.58E-142   |
| 573 | 140685 | ZBTB46   | 3.31  | 1.04  | -1.670248 | 7.09E-17    |
| 574 | 2268   | FGR      | 1.41  | 0.44  | -1.68012  | 5.49E-05    |
| 575 | 349667 | RTN4RL2  | 11.89 | 3.71  | -1.680258 | 1.13E-29    |
| 576 | 113791 | PIK3IP1  | 2.13  | 0.66  | -1.690316 | 1.71E-06    |
| 577 | 83937  | RASSF4   | 0.94  | 0.29  | -1.696608 | 3.29E-04    |
| 578 | 22998  | LIMCH1   | 1.2   | 0.37  | -1.697437 | 1.54E-09    |
| 579 | 79690  | GAL3ST4  | 0.69  | 0.21  | -1.716207 | 0.011100759 |
| 580 | 56833  | SLAMF8   | 8.65  | 2.63  | -1.717637 | 1.04E-27    |
| 581 | 29799  | YPEL1    | 0.56  | 0.17  | -1.719892 | 8.87E-04    |
| 582 | 285    | ANGPT2   | 0.66  | 0.2   | -1.722466 | 1.11E-04    |
| 583 | 534    | ATP6V1G2 | 3.3   | 0.99  | -1.736966 | 1.81E-05    |
| 584 | 57639  | CCDC146  | 1.2   | 0.36  | -1.736966 | 1.18E-05    |
| 585 | 56265  | CPXM1    | 0.7   | 0.21  | -1.736966 | 0.011098571 |
| 586 | 122402 | TDRD9    | 0.3   | 0.09  | -1.736966 | 0.022357752 |
| 587 | 192683 | SCAMP5   | 12.54 | 3.73  | -1.74929  | 3.59E-41    |
| 588 | 7128   | TNFAIP3  | 21.02 | 6.22  | -1.756776 | 2.32E-129   |
| 589 | 57636  | ARHGAP23 | 0.88  | 0.26  | -1.758992 | 5.31E-07    |
| 590 | 345222 | MSANTD1  | 0.17  | 0.05  | -1.765535 | 0.015261412 |
| 591 | 113451 | AZIN2    | 2.56  | 0.75  | -1.771181 | 2.90E-09    |
| 592 | 2998   | GYS2     | 1.71  | 0.5   | -1.773996 | 1.63E-06    |
| 593 | 2150   | F2RL1    | 1.13  | 0.33  | -1.775785 | 1.67E-04    |
| 594 | 9254   | CACNA2D2 | 0.62  | 0.18  | -1.784271 | 5.50E-05    |
| 595 | 121340 | SP7      | 0.69  | 0.2   | -1.786596 | 0.002382075 |
| 596 | 4916   | NTRK3    | 0.73  | 0.21  | -1.797507 | 2.22E-07    |
| 597 | 117286 | CIB3     | 2.6   | 0.74  | -1.812914 | 0.022361796 |
| 598 | 2740   | GLP1R    | 0.88  | 0.25  | -1.815575 | 1.20E-05    |
| 599 | 9715   | FAM131B  | 1.42  | 0.4   | -1.827819 | 5.69E-09    |
| 600 | 4688   | NCF2     | 0.71  | 0.2   | -1.827819 | 0.008164977 |
| 601 | 10125  | RASGRP1  | 0.75  | 0.21  | -1.836501 | 6.15E-06    |
| 602 | 3084   | NRG1     | 0.69  | 0.19  | -1.860597 | 0.001936178 |
| 603 | 7476   | WNT7A    | 1.57  | 0.43  | -1.868356 | 1.94E-04    |
| 604 | 1949   | EFNB3    | 4.44  | 1.2   | -1.887525 | 6.50E-20    |
| 605 | 1846   | DUSP4    | 1.87  | 0.5   | -1.903038 | 1.52E-15    |
| 606 | 57586  | SYT13    | 0.3   | 0.08  | -1.906891 | 0.005241618 |
| 607 | 115701 | ALPK2    | 0.15  | 0.04  | -1.906891 | 0.015854848 |

|     |           |                |        |       |           |             |
|-----|-----------|----------------|--------|-------|-----------|-------------|
| 608 | 9381      | OTOF           | 0.38   | 0.1   | -1.925999 | 0.004145769 |
| 609 | 388419    | BTBD17         | 0.84   | 0.22  | -1.932886 | 0.009101387 |
| 610 | 2661      | GDF9           | 0.73   | 0.19  | -1.941897 | 0.010329311 |
| 611 | 595       | CCND1          | 25.73  | 6.59  | -1.965101 | 6.54E-160   |
| 612 | 1577      | CYP3A5         | 0.43   | 0.11  | -1.966833 | 8.17E-04    |
| 613 | 114118903 | ARHGAP11A-SCG5 | 0.55   | 0.14  | -1.974005 | 0.003326955 |
| 614 | 102800317 | TPTEP2-CSNK1E  | 0.63   | 0.16  | -1.97728  | 4.77E-04    |
| 615 | 126364    | LRRC25         | 0.83   | 0.21  | -1.982722 | 0.007213342 |
| 616 | 100133941 | CD24           | 7.88   | 1.98  | -1.992695 | 3.46E-25    |
| 617 | 53637     | S1PR5          | 0.72   | 0.18  | -2        | 0.003327706 |
| 618 | 113146    | AHNAK2         | 0.04   | 0     | -2        | 0.015264306 |
| 619 | 58480     | RHOU           | 1.89   | 0.47  | -2.007654 | 8.32E-12    |
| 620 | 84329     | HVCN1          | 2.76   | 0.68  | -2.021062 | 9.78E-07    |
| 621 | 149428    | BNIP1          | 0.41   | 0.1   | -2.035624 | 0.043958081 |
| 622 | 29933     | GPR132         | 1.04   | 0.25  | -2.056584 | 1.84E-05    |
| 623 | 51268     | PIPOX          | 0.46   | 0.11  | -2.06413  | 0.04395086  |
| 624 | 114335    | CGB1           | 2.95   | 0.7   | -2.075288 | 0.002282734 |
| 625 | 4624      | MYH6           | 0.38   | 0.09  | -2.078003 | 2.79E-04    |
| 626 | 80128     | TRIM46         | 2.34   | 0.55  | -2.089005 | 1.60E-10    |
| 627 | 7481      | WNT11          | 7.41   | 1.71  | -2.115477 | 4.47E-23    |
| 628 | 124460    | SNX20          | 1.91   | 0.44  | -2.117997 | 4.13E-09    |
| 629 | 5452      | POU2F2         | 4.35   | 1     | -2.121015 | 2.87E-33    |
| 630 | 5553      | PRG2           | 109.75 | 25.05 | -2.131338 | 3.87E-222   |
| 631 | 5159      | PDGFRB         | 0.57   | 0.13  | -2.13245  | 5.23E-06    |
| 632 | 58473     | PLEKHB1        | 1.06   | 0.24  | -2.142958 | 8.09E-04    |
| 633 | 10148     | EBI3           | 2.57   | 0.58  | -2.147644 | 2.46E-05    |
| 634 | 1436      | CSF1R          | 1.64   | 0.37  | -2.148099 | 4.91E-11    |
| 635 | 283       | ANG            | 0.89   | 0.2   | -2.153805 | 0.043943642 |
| 636 | 50839     | TAS2R10        | 1.34   | 0.3   | -2.159199 | 0.027491719 |
| 637 | 2953      | GSTT2          | 2.55   | 0.57  | -2.161463 | 6.63E-05    |
| 638 | 3055      | HCK            | 6.81   | 1.48  | -2.202058 | 6.06E-23    |
| 639 | 399474    | TMEM200B       | 0.97   | 0.21  | -2.207595 | 1.11E-04    |
| 640 | 2814      | GP5            | 0.37   | 0.08  | -2.209453 | 0.006086592 |
| 641 | 3067      | HDC            | 45.12  | 9.67  | -2.222179 | 1.35E-176   |
| 642 | 64137     | ABCG4          | 0.19   | 0.04  | -2.247928 | 0.047040297 |
| 643 | 3604      | TNFRSF9        | 6.86   | 1.44  | -2.25214  | 4.17E-56    |
| 644 | 64218     | SEMA4A         | 3.53   | 0.73  | -2.2737   | 9.79E-19    |
| 645 | 151056    | PLB1           | 0.49   | 0.1   | -2.292782 | 8.81E-06    |
| 646 | 773       | CACNA1A        | 0.05   | 0     | -2.321928 | 0.036250079 |
| 647 | 388284    | C16orf86       | 0.67   | 0.13  | -2.365649 | 0.022365841 |
| 648 | 3955      | LFNG           | 3.38   | 0.65  | -2.378512 | 4.12E-14    |
| 649 | 2824      | GPM6B          | 0.21   | 0.04  | -2.392317 | 0.010019666 |
| 650 | 22997     | IGSF9B         | 0.43   | 0.08  | -2.426265 | 2.94E-15    |
| 651 | 56126     | PCDHB10        | 0.22   | 0.04  | -2.459432 | 0.047055538 |
| 652 | 2012      | EMP1           | 0.11   | 0.02  | -2.459432 | 0.046451415 |
| 653 | 92949     | ADAMTSL1       | 0.11   | 0.02  | -2.459432 | 0.047047917 |
| 654 | 170261    | ZCCHC12        | 0.94   | 0.17  | -2.467126 | 1.81E-04    |
| 655 | 51314     | NME8           | 0.72   | 0.13  | -2.469485 | 8.17E-04    |
| 656 | 1441      | CSF3R          | 0.39   | 0.07  | -2.478047 | 0.010294535 |
| 657 | 8862      | APLN           | 0.39   | 0.07  | -2.478047 | 0.003709889 |
| 658 | 152273    | FGD5           | 0.62   | 0.11  | -2.494765 | 9.23E-08    |
| 659 | 441155    | LOC441155      | 0.17   | 0.03  | -2.5025   | 0.046458965 |
| 660 | 330       | BIRC3          | 6.04   | 1.06  | -2.510484 | 1.26E-86    |
| 661 | 23430     | TPSD1          | 7.4    | 1.29  | -2.520154 | 6.67E-21    |
| 662 | 64499     | TPSB2          | 12.37  | 2.07  | -2.579143 | 7.75E-25    |
| 663 | 7143      | TNR            | 0.06   | 0.01  | -2.584963 | 0.026858501 |
| 664 | 23671     | TMEFF2         | 0.69   | 0.11  | -2.649093 | 0.001375477 |
| 665 | 23604     | DAPK2          | 1.91   | 0.3   | -2.670538 | 3.89E-09    |
| 666 | 100049587 | SIGLEC14       | 1.53   | 0.24  | -2.672425 | 1.29E-08    |
| 667 | 378948    | RBM1B          | 0.51   | 0.08  | -2.672425 | 0.017025677 |
| 668 | 259307    | IL411          | 5.46   | 0.85  | -2.683366 | 1.77E-18    |

|     |           |                |      |      |           |             |
|-----|-----------|----------------|------|------|-----------|-------------|
| 669 | 196883    | ADCY4          | 0.58 | 0.09 | -2.688056 | 1.07E-04    |
| 670 | 79899     | PRR5L          | 0.39 | 0.06 | -2.70044  | 7.54E-04    |
| 671 | 10288     | LILRB2         | 1.12 | 0.17 | -2.719892 | 9.58E-09    |
| 672 | 241       | ALOX5AP        | 2.01 | 0.3  | -2.744161 | 0.001301982 |
| 673 | 79955     | PDZD7          | 0.48 | 0.07 | -2.777608 | 0.00221226  |
| 674 | 7483      | WNT9A          | 0.14 | 0.02 | -2.807355 | 0.046474074 |
| 675 | 5923      | RASGRF1        | 0.07 | 0    | -2.807355 | 0.036237803 |
| 676 | 729877    | TBC1D3H        | 0.5  | 0.07 | -2.836501 | 1.85E-05    |
| 677 | 221188    | ADGRG5         | 2.97 | 0.41 | -2.856767 | 4.48E-23    |
| 678 | 222487    | ADGRG3         | 0.97 | 0.13 | -2.899473 | 1.07E-05    |
| 679 | 5724      | PTAFR          | 3.61 | 0.46 | -2.972293 | 2.71E-34    |
| 680 | 313       | AOAH           | 0.24 | 0.03 | -3        | 0.015255627 |
| 681 | 8748      | ADAM20         | 0.08 | 0    | -3        | 0.019233603 |
| 682 | 3689      | ITGB2          | 3.5  | 0.43 | -3.024946 | 8.20E-24    |
| 683 | 286436    | H2BW2          | 0.33 | 0.04 | -3.044394 | 0.046466518 |
| 684 | 102724265 | LOC102724265   | 0.25 | 0.03 | -3.058894 | 0.046436321 |
| 685 | 124602    | KIF19          | 0.52 | 0.06 | -3.115477 | 4.63E-05    |
| 686 | 6547      | SLC8A3         | 0.53 | 0.06 | -3.142958 | 6.84E-08    |
| 687 | 3887      | KRT81          | 0.36 | 0.04 | -3.169925 | 0.026849026 |
| 688 | 56924     | PAK6           | 0.36 | 0.04 | -3.169925 | 1.98E-04    |
| 689 | 56659     | KCNK13         | 0.27 | 0.03 | -3.169925 | 0.046481632 |
| 690 | 497189    | TIFAB          | 0.18 | 0.02 | -3.169925 | 0.0033927   |
| 691 | 51705     | EMCN           | 0.18 | 0.02 | -3.169925 | 0.015258519 |
| 692 | 56122     | PCDHB14        | 0.18 | 0.02 | -3.169925 | 0.026853763 |
| 693 | 4625      | MYH7           | 0.09 | 0.01 | -3.169925 | 0.046443867 |
| 694 | 54847     | SIDT1          | 0.19 | 0.02 | -3.247928 | 0.015267202 |
| 695 | 10090     | UST            | 0.1  | 0    | -3.321928 | 0.036219405 |
| 696 | 26034     | IPCEF1         | 0.1  | 0    | -3.321928 | 0.002788615 |
| 697 | 653489    | RGPD3          | 1.72 | 0.17 | -3.338802 | 2.88E-27    |
| 698 | 126147    | NTN5           | 0.41 | 0.04 | -3.357552 | 0.008554271 |
| 699 | 51725     | FBXO40         | 0.11 | 0.01 | -3.459432 | 0.026863242 |
| 700 | 81031     | SLC2A10        | 0.34 | 0.03 | -3.5025   | 7.54E-04    |
| 701 | 56127     | PCDHB9         | 0.24 | 0.02 | -3.584963 | 8.03E-04    |
| 702 | 4049      | LTA            | 3.51 | 0.28 | -3.647972 | 5.47E-11    |
| 703 | 924       | CD7            | 4.12 | 0.32 | -3.686501 | 2.56E-13    |
| 704 | 5940      | RBMV1A1        | 1.77 | 0.13 | -3.767166 | 3.78E-08    |
| 705 | 149345    | SHISA4         | 1.5  | 0.11 | -3.769387 | 5.52E-06    |
| 706 | 219537    | SMTNL1         | 0.83 | 0.06 | -3.790077 | 6.29E-04    |
| 707 | 157695    | TDRP           | 0.15 | 0    | -3.906891 | 0.019230062 |
| 708 | 26154     | ABCA12         | 0.15 | 0.01 | -3.906891 | 1.98E-04    |
| 709 | 79630     | C1orf54        | 4.43 | 0.27 | -4.036275 | 0.002662782 |
| 710 | 100529144 | CORO7-PAM16    | 0.17 | 0    | -4.087463 | 0.019237146 |
| 711 | 100529215 | ZNF559-ZNF177  | 0.18 | 0    | -4.169925 | 0.036225536 |
| 712 | 100423062 | IGLL5          | 3.78 | 0.19 | -4.314315 | 1.22E-13    |
| 713 | 2214      | FCGR3A         | 0.21 | 0    | -4.392317 | 0.03624394  |
| 714 | 100506164 | HSFX1          | 0.28 | 0    | -4.807355 | 0.019226522 |
| 715 | 440804    | RIMBP3B        | 0.28 | 0.01 | -4.807355 | 1.88E-06    |
| 716 | 3855      | KRT7           | 0.3  | 0    | -4.906891 | 0.036213276 |
| 717 | 102723737 | CT45A8         | 0.98 | 0.03 | -5.029747 | 0.005316333 |
| 718 | 27122     | DKK3           | 0.33 | 0    | -5.044394 | 7.56E-04    |
| 719 | 140691    | TRIM69         | 0.37 | 0    | -5.209453 | 0.010136111 |
| 720 | 553158    | PRR5-ARHGAP8   | 0.43 | 0    | -5.426265 | 7.56E-04    |
| 721 | 360200    | TMPRSS9        | 0.45 | 0    | -5.491853 | 2.74E-05    |
| 722 | 27232     | GNMT           | 0.55 | 0    | -5.78136  | 0.036231668 |
| 723 | 388372    | CCL4L1         | 1.1  | 0    | -6.78136  | 0.005318607 |
| 724 | 100526761 | CCDC169-SOHLH2 | 1.36 | 0    | -7.087463 | 3.29E-14    |
