# Supplementary material for: FLI1 induces erythroleukemia through opposing effects on UBASH3A and UBASH3B expression
Source: PubMed Central journal article supplement (PMC10925000; doi:10.1186/s12885-024-12075-2), 2024-03-09
Supplement: 12885_2024_12075_MOESM2_ESM.pdf [file 12885_2024_12075_MOESM2_ESM.pdf]

**Supplemental Table 2. Differential expression of genes in Scrambled and shUBASH3B**

|    | Gene ID   | Gene Symbol     | Scrambled<br>FPKM | shUBASH3<br>B FPKM | log2FoldC<br>hange | Padj        |
|----|-----------|-----------------|-------------------|--------------------|--------------------|-------------|
| 1  | 58530     | LY6G6D          | 0                 | 6.38               | 9.3174126          | 5.38E-04    |
| 2  | 100529063 | BCL2L2-PABPN1   | 0                 | 6.29               | 9.2969162          | 1.88E-50    |
| 3  | 8363      | H4C11           | 0                 | 4.3                | 8.7481929          | 0.011871465 |
| 4  | 552891    | DNAJC25-GNG10   | 0                 | 1.16               | 6.857981           | 1.86E-06    |
| 5  | 9506      | PAGE4           | 0                 | 1.12               | 6.8073549          | 0.006434251 |
| 6  | 728689    | EIF3CL          | 0                 | 1.01               | 6.6582115          | 7.69E-13    |
| 7  | 100526832 | PHOSPHO2-KLHL23 | 0                 | 0.95               | 6.5698556          | 9.36E-17    |
| 8  | 102723680 | CT45A9          | 0                 | 0.48               | 5.5849625          | 0.021715748 |
| 9  | 725       | C4BPB           | 0                 | 0.46               | 5.523562           | 0.01187313  |
| 10 | 49        | ACR             | 0                 | 0.44               | 5.4594316          | 0.0118698   |
| 11 | 100528032 | KLRC4-KLRK1     | 0                 | 0.4                | 5.3219281          | 0.003477916 |
| 12 | 2353      | FOS             | 2.53              | 86.76              | 5.0998208          | 0           |
| 13 | 105378260 | LOC105378260    | 0                 | 0.34               | 5.0874628          | 0.039601352 |
| 14 | 112268186 | LOC112268186    | 0                 | 0.33               | 5.0443941          | 0.03959149  |
| 15 | 140711    | TLDC2           | 0                 | 0.32               | 5                  | 0.021701384 |
| 16 | 2826      | CCR10           | 0                 | 0.31               | 4.9541963          | 0.02171     |
| 17 | 3231      | HOXD1           | 0                 | 0.27               | 4.7548875          | 0.021721499 |
| 18 | 221749    | PXDC1           | 0                 | 0.25               | 4.6438562          | 0.021704255 |
| 19 | 5309      | PITX3           | 0.06              | 1.48               | 4.6244909          | 1.02E-06    |
| 20 | 146212    | KCTD19          | 0                 | 0.24               | 4.5849625          | 0.003477379 |
| 21 | 90853     | SPOCD1          | 0                 | 0.23               | 4.523562           | 0.011874796 |
| 22 | 3200      | HOXA3           | 0.02              | 0.46               | 4.523562           | 6.72E-05    |
| 23 | 729238    | SFTPA2          | 0                 | 0.2                | 4.3219281          | 0.039616155 |
| 24 | 353376    | TICAM2          | 0                 | 0.2                | 4.3219281          | 0.006436148 |
| 25 | 3196      | TLX2            | 0                 | 0.2                | 4.3219281          | 0.03959642  |
| 26 | 10083     | USH1C           | 0                 | 0.2                | 4.3219281          | 0.021724376 |
| 27 | 8875      | VNN2            | 0.2               | 3.88               | 4.2779847          | 5.03E-23    |
| 28 | 106821730 | BUB1B-PAK6      | 0                 | 0.19               | 4.2479275          | 0.003478453 |
| 29 | 9071      | CLDN10          | 0                 | 0.19               | 4.2479275          | 0.039586561 |
| 30 | 10110     | SGK2            | 0.04              | 0.75               | 4.2288187          | 3.66E-05    |
| 31 | 1943      | EFNA2           | 0                 | 0.18               | 4.169925           | 0.039635908 |
| 32 | 2272      | FHIT            | 0                 | 0.17               | 4.0874628          | 0.003476306 |
| 33 | 5156      | PDGFRA          | 0                 | 0.17               | 4.0874628          | 0.003476842 |
| 34 | 50509     | COL5A3          | 0                 | 0.16               | 4                  | 5.38E-04    |
| 35 | 84466     | MEGF10          | 0.01              | 0.14               | 3.8073549          | 6.75E-04    |
| 36 | 89866     | SEC16B          | 0                 | 0.14               | 3.8073549          | 0.011876463 |
| 37 | 143503    | OR51E1          | 0                 | 0.14               | 3.8073549          | 0.039626029 |
| 38 | 2886      | GRB7            | 0.04              | 0.55               | 3.7813597          | 3.79E-04    |
| 39 | 2354      | FOSB            | 1.29              | 17.24              | 3.7403168          | 1.25E-187   |
| 40 | 401563    | C9orf139        | 0                 | 0.13               | 3.7004397          | 0.021718623 |
| 41 | 57509     | MTUS1           | 0                 | 0.13               | 3.7004397          | 0.021712874 |
| 42 | 1959      | EGR2            | 0.15              | 1.84               | 3.6166714          | 3.24E-15    |
| 43 | 79784     | MYH14           | 0.01              | 0.12               | 3.5849625          | 0.006440135 |
| 44 | 80176     | SPSB1           | 0.02              | 0.24               | 3.5849625          | 0.011164306 |
| 45 | 91608     | RASL10B         | 0.02              | 0.24               | 3.5849625          | 0.011159583 |
| 46 | 10365     | KLF2            | 0.03              | 0.35               | 3.5443205          | 0.002112542 |
| 47 | 139728    | PNCK            | 0.04              | 0.45               | 3.4918531          | 0.011162731 |
| 48 | 5790      | PTPRCAP         | 0.29              | 3.22               | 3.4729359          | 3.97E-07    |
| 49 | 2018      | EMX2            | 0.12              | 1.33               | 3.4703199          | 8.29E-10    |
| 50 | 151790    | WDR49           | 0                 | 0.11               | 3.4594316          | 0.03964085  |
| 51 | 11067     | DEPP1           | 0.36              | 3.93               | 3.4484605          | 1.43E-21    |
| 52 | 1958      | ERG1            | 28.75             | 311.89             | 3.4394034          | 0           |
| 53 | 55287     | TMEM40          | 0.14              | 1.51               | 3.4310498          | 2.12E-08    |
| 54 | 4160      | MC4R            | 0.05              | 0.53               | 3.4059924          | 0.006442032 |
| 55 | 5166      | PDK4            | 0.02              | 0.21               | 3.3923174          | 0.011161157 |
| 56 | 114132    | SIGLEC11        | 0.21              | 2.17               | 3.3692338          | 1.12E-16    |
| 57 | 163732    | CITED4          | 0.06              | 0.61               | 3.3457748          | 0.019111715 |
| 58 | 374786    | EFCAB5          | 0                 | 0.1                | 3.3219281          | 0.039611219 |

|     |           |              |      |       |           |             |
|-----|-----------|--------------|------|-------|-----------|-------------|
| 59  | 3777      | KCNK3        | 0    | 0.1   | 3.3219281 | 0.006437096 |
| 60  | 100526783 | ARPIN-AP3S2  | 0    | 0.1   | 3.3219281 | 0.006435199 |
| 61  | 130813    | C2orf50      | 0    | 0.1   | 3.3219281 | 0.021707128 |
| 62  | 3491      | CCN1         | 1.74 | 17.39 | 3.3210987 | 2.16E-98    |
| 63  | 1572      | CYP2F1       | 0.09 | 0.88  | 3.2895066 | 1.17E-04    |
| 64  | 440503    | PLIN5        | 0.03 | 0.29  | 3.2730185 | 0.019106589 |
| 65  | 59277     | NTN4         | 0.64 | 6.18  | 3.271463  | 9.99E-58    |
| 66  | 9080      | CLDN9        | 0.05 | 0.48  | 3.2630344 | 0.019109151 |
| 67  | 359       | AQP2         | 0.02 | 0.19  | 3.2479275 | 0.006442982 |
| 68  | 146862    | UNC45B       | 0.02 | 0.19  | 3.2479275 | 6.75E-04    |
| 69  | 11173     | ADAMTS7      | 0.22 | 2.07  | 3.2340553 | 6.47E-31    |
| 70  | 123591    | TMEM266      | 0.03 | 0.27  | 3.169925  | 0.032433861 |
| 71  | 133       | ADM          | 0.11 | 0.98  | 3.1552782 | 6.05E-04    |
| 72  | 1277      | COL1A1       | 0.31 | 2.73  | 3.1385608 | 1.82E-42    |
| 73  | 2669      | GEM          | 0.04 | 0.34  | 3.0874628 | 0.019104027 |
| 74  | 3725      | JUN          | 8.83 | 72.9  | 3.0454335 | 0           |
| 75  | 114794    | ELFN2        | 0.02 | 0.16  | 3         | 7.95E-04    |
| 76  | 1278      | COL1A2       | 0    | 0.08  | 3         | 0.039621091 |
| 77  | 57348     | TTYH1        | 0.04 | 0.32  | 3         | 0.032442113 |
| 78  | 5743      | PTGS2        | 1.14 | 9.08  | 2.9936585 | 1.70E-98    |
| 79  | 83715     | ESPN         | 0.42 | 3.26  | 2.9564107 | 1.49E-25    |
| 80  | 199720    | GGN          | 0.07 | 0.54  | 2.9475326 | 0.001771221 |
| 81  | 3399      | ID3          | 1.78 | 13.64 | 2.9378945 | 1.53E-23    |
| 82  | 51754     | TMEM8B       | 0.5  | 3.82  | 2.9335726 | 2.28E-21    |
| 83  | 148738    | HJV          | 0.06 | 0.45  | 2.9068906 | 0.006441084 |
| 84  | 139221    | PWWP3B       | 0.02 | 0.15  | 2.9068906 | 0.032437987 |
| 85  | 154091    | SLC2A12      | 0.03 | 0.22  | 2.8744691 | 0.013831995 |
| 86  | 11155     | LDB3         | 0.03 | 0.22  | 2.8744691 | 0.036637146 |
| 87  | 187       | APLNR        | 1.69 | 12.27 | 2.8600401 | 8.37E-108   |
| 88  | 57644     | MYH7B        | 0.31 | 2.22  | 2.8402196 | 2.98E-33    |
| 89  | 57159     | TRIM54       | 0.08 | 0.57  | 2.83289   | 0.005026485 |
| 90  | 158038    | LINGO2       | 0.01 | 0.07  | 2.8073549 | 0.023775469 |
| 91  | 92689     | FAM114A1     | 0.81 | 5.64  | 2.7997014 | 7.49E-47    |
| 92  | 143098    | MPP7         | 0.17 | 1.18  | 2.7951802 | 3.35E-06    |
| 93  | 121793    | TEX29        | 0.14 | 0.96  | 2.7776076 | 0.036641751 |
| 94  | 127343    | DMBX1        | 0.05 | 0.34  | 2.7655347 | 0.001320892 |
| 95  | 56666     | PANX2        | 1.26 | 8.47  | 2.7489382 | 3.99E-55    |
| 96  | 2348      | FOLR1        | 0.41 | 2.7   | 2.7192636 | 7.66E-05    |
| 97  | 107985381 | LOC107985381 | 0.14 | 0.91  | 2.7004397 | 0.008368768 |
| 98  | 6383      | SDC2         | 0.32 | 2.07  | 2.693487  | 1.79E-15    |
| 99  | 148398    | SAMD11       | 0.07 | 0.45  | 2.6844982 | 0.002990439 |
| 100 | 55281     | TMEM140      | 0.24 | 1.52  | 2.662965  | 1.21E-06    |
| 101 | 10123     | ARL4C        | 0.06 | 0.38  | 2.662965  | 4.75E-04    |
| 102 | 55586     | MIOX         | 0.05 | 0.31  | 2.6322682 | 0.021698514 |
| 103 | 23779     | ARHGAP8      | 1.33 | 8.21  | 2.625956  | 2.51E-25    |
| 104 | 100113407 | TMEM170B     | 0.02 | 0.12  | 2.5849625 | 0.005841081 |
| 105 | 6492      | SIM1         | 0    | 0.06  | 2.5849625 | 0.039606285 |
| 106 | 116444    | GRIN3B       | 0.1  | 0.6   | 2.5849625 | 9.36E-04    |
| 107 | 10579     | TACC2        | 0.65 | 3.86  | 2.5700892 | 6.00E-43    |
| 108 | 112268237 | LOC112268237 | 0.19 | 1.12  | 2.5594274 | 0.002186675 |
| 109 | 56704     | JPH1         | 0.07 | 0.41  | 2.5501971 | 3.49E-04    |
| 110 | 2069      | EREG         | 1.34 | 7.83  | 2.5467793 | 3.04E-73    |
| 111 | 163175    | LGI4         | 0.06 | 0.35  | 2.5443205 | 0.013833906 |
| 112 | 51481     | VCX3A        | 0.19 | 1.08  | 2.50696   | 0.022613119 |
| 113 | 126006    | PCP2         | 2.09 | 11.8  | 2.497212  | 4.34E-13    |
| 114 | 100128569 | C19orf71     | 0.34 | 1.91  | 2.489966  | 0.022610139 |
| 115 | 29948     | OSGIN1       | 0.89 | 4.97  | 2.4813686 | 1.16E-17    |
| 116 | 197257    | LDHD         | 0.46 | 2.53  | 2.4594316 | 4.79E-10    |
| 117 | 266727    | MDGA1        | 0.1  | 0.54  | 2.4329594 | 3.22E-05    |
| 118 | 51296     | SLC15A3      | 0.09 | 0.48  | 2.4150375 | 0.005840212 |
| 119 | 1364      | CLDN4        | 0.13 | 0.69  | 2.4080847 | 0.005839343 |

|     |           |               |       |        |           |             |
|-----|-----------|---------------|-------|--------|-----------|-------------|
| 120 | 3726      | JUNB          | 88.13 | 467.09 | 2.4059954 | 0           |
| 121 | 2555      | GABRA2        | 1.34  | 7.06   | 2.3974352 | 5.82E-86    |
| 122 | 220004    | PPP1R32       | 0.81  | 4.26   | 2.3948596 | 1.52E-11    |
| 123 | 29119     | CTNNA3        | 0.39  | 2.05   | 2.3940779 | 1.48E-12    |
| 124 | 554313    | H4C15         | 2.81  | 14.58  | 2.3753487 | 1.51E-04    |
| 125 | 8370      | H4C14         | 2.81  | 14.58  | 2.3753487 | 1.51E-04    |
| 126 | 347735    | SERINC2       | 0.12  | 0.62   | 2.3692338 | 0.009398291 |
| 127 | 57662     | CAMSAP3       | 0.26  | 1.34   | 2.3656495 | 6.54E-11    |
| 128 | 100293534 | C4B_2         | 0.15  | 0.76   | 2.3410369 | 2.07E-08    |
| 129 | 6615      | SNAI1         | 1.22  | 6.17   | 2.3383893 | 8.14E-18    |
| 130 | 136853    | SSC4D         | 0.48  | 2.42   | 2.3339007 | 3.32E-12    |
| 131 | 51513     | ETV7          | 0.34  | 1.71   | 2.3303897 | 1.50E-05    |
| 132 | 646951    | MINDY4B       | 0.49  | 2.45   | 2.3219281 | 3.88E-09    |
| 133 | 79190     | IRX6          | 0.08  | 0.4    | 2.3219281 | 0.00939695  |
| 134 | 166336    | PRICKLE2      | 0.08  | 0.4    | 2.3219281 | 2.88E-07    |
| 135 | 51308     | REEP2         | 0.18  | 0.88   | 2.2895066 | 6.41E-04    |
| 136 | 65078     | RTN4R         | 0.24  | 1.17   | 2.2854022 | 1.69E-04    |
| 137 | 159686    | CFAP58        | 0.07  | 0.34   | 2.2801079 | 0.009395609 |
| 138 | 9185      | REPS2         | 0.07  | 0.34   | 2.2801079 | 2.46E-04    |
| 139 | 11189     | CELF3         | 0.06  | 0.29   | 2.2730185 | 6.81E-04    |
| 140 | 652968    | CASTOR1       | 0.65  | 3.14   | 2.2722529 | 6.04E-08    |
| 141 | 6640      | SNTA1         | 1     | 4.8    | 2.2630344 | 4.49E-18    |
| 142 | 6521      | SLC4A1        | 0.25  | 1.2    | 2.2630344 | 7.78E-08    |
| 143 | 333926    | PPM1J         | 3.12  | 14.93  | 2.2585962 | 1.73E-40    |
| 144 | 114108587 | ATF7-NPFF     | 0.49  | 2.33   | 2.2494763 | 5.27E-07    |
| 145 | 252884    | ZNF396        | 0.11  | 0.52   | 2.2410081 | 0.022403966 |
| 146 | 100529215 | ZNF559-ZNF177 | 0.18  | 0.85   | 2.2394659 | 1.69E-04    |
| 147 | 28999     | KLF15         | 0.12  | 0.56   | 2.2223924 | 0.003899359 |
| 148 | 358       | AQP1          | 23.84 | 110.9  | 2.2178032 | 0           |
| 149 | 57477     | SHROOM4       | 0.08  | 0.37   | 2.2094534 | 4.32E-04    |
| 150 | 402778    | IFITM10       | 0.1   | 0.46   | 2.2016339 | 0.00102651  |
| 151 | 54932     | EXD3          | 1.03  | 4.71   | 2.1930827 | 1.10E-08    |
| 152 | 100532736 | MICOS10-NBL1  | 0.11  | 0.5    | 2.1844246 | 0.015011171 |
| 153 | 2868      | GRK4          | 0.73  | 3.29   | 2.1721192 | 8.60E-10    |
| 154 | 4585      | MUC4          | 0.04  | 0.18   | 2.169925  | 1.11E-07    |
| 155 | 114792    | KLHL32        | 0.45  | 2.01   | 2.1591986 | 6.94E-07    |
| 156 | 256949    | KANK3         | 0.32  | 1.42   | 2.1497471 | 2.46E-07    |
| 157 | 107984638 | LOC107984638  | 0.69  | 3.06   | 2.1488634 | 9.16E-07    |
| 158 | 7450      | VWF           | 0.56  | 2.48   | 2.1468414 | 1.98E-37    |
| 159 | 26548     | ITGB1BP2      | 0.27  | 1.19   | 2.1399303 | 0.006219393 |
| 160 | 65989     | DLK2          | 0.15  | 0.66   | 2.1375035 | 0.035882325 |
| 161 | 4082      | MARCKS        | 0.33  | 1.44   | 2.1255309 | 1.04E-10    |
| 162 | 222183    | SRRM3         | 0.28  | 1.22   | 2.1233824 | 4.44E-08    |
| 163 | 3134      | HLA-F         | 17.24 | 74.76  | 2.1165068 | 1.65E-116   |
| 164 | 8532      | CPZ           | 0.66  | 2.86   | 2.1154772 | 6.59E-10    |
| 165 | 94240     | EPSTI1        | 2.92  | 12.52  | 2.1001943 | 9.09E-26    |
| 166 | 7057      | THBS1         | 1.42  | 6.08   | 2.0981804 | 3.00E-58    |
| 167 | 162461    | TMEM92        | 0.42  | 1.79   | 2.0914984 | 0.003482978 |
| 168 | 102724473 | GAGE10        | 0.69  | 2.9    | 2.0713846 | 0.037196509 |
| 169 | 102724219 | LOC102724219  | 0.21  | 0.88   | 2.0671142 | 9.14E-06    |
| 170 | 374       | AREG          | 1.6   | 6.7    | 2.0660892 | 1.96E-11    |
| 171 | 107985416 | LOC107985416  | 0.44  | 1.84   | 2.0641303 | 0.009775612 |
| 172 | 151126    | ZNF385B       | 0.75  | 3.13   | 2.0612002 | 1.11E-16    |
| 173 | 57333     | RCN3          | 12.79 | 53.12  | 2.0542389 | 2.25E-106   |
| 174 | 160518    | DENND5B       | 1.05  | 4.36   | 2.0539388 | 1.88E-16    |
| 175 | 440689    | H2BC18        | 1.52  | 6.3    | 2.0512805 | 0.006294569 |
| 176 | 64285     | RHBDF1        | 0.29  | 1.2    | 2.0489096 | 5.67E-06    |
| 177 | 5730      | PTGDS         | 0.37  | 1.53   | 2.0479345 | 0.037205838 |
| 178 | 22924     | MAPRE3        | 1.88  | 7.77   | 2.0471819 | 5.33E-21    |
| 179 | 54541     | DDIT4         | 43.29 | 178.84 | 2.0465637 | 0           |
| 180 | 79605     | PGBD5         | 0.21  | 0.86   | 2.0339473 | 1.51E-15    |

|     |           |               |        |        |           |             |
|-----|-----------|---------------|--------|--------|-----------|-------------|
| 181 | 128506    | OCSTAMP       | 0.21   | 0.85   | 2.0170735 | 0.001635806 |
| 182 | 2815      | GP9           | 135.14 | 546.55 | 2.0158987 | 0           |
| 183 | 23678     | SGK3          | 0.27   | 1.09   | 2.0132968 | 7.38E-08    |
| 184 | 4035      | LRP1          | 0.61   | 2.46   | 2.0117772 | 3.03E-58    |
| 185 | 6649      | SOD3          | 0.18   | 0.72   | 2         | 0.037187184 |
| 186 | 5155      | PDGFB         | 0.52   | 2.08   | 2         | 2.68E-13    |
| 187 | 8609      | KLF7          | 0.06   | 0.24   | 2         | 0.009697476 |
| 188 | 8681      | JMJD7-PLA2G4B | 0.84   | 3.33   | 1.9870609 | 3.22E-17    |
| 189 | 8357      | H3C10         | 7.14   | 28.26  | 1.9847655 | 4.40E-10    |
| 190 | 100132074 | FOXO6         | 0.64   | 2.53   | 1.9829936 | 3.25E-11    |
| 191 | 7538      | ZFP36         | 37.83  | 149.5  | 1.9825428 | 0           |
| 192 | 9592      | IER2          | 85.47  | 335.83 | 1.9742411 | 0           |
| 193 | 2         | A2M           | 0.28   | 1.1    | 1.9740048 | 2.11E-08    |
| 194 | 4332      | MNDA          | 0.19   | 0.74   | 1.9615259 | 0.015208319 |
| 195 | 55366     | LGR4          | 3.27   | 12.73  | 1.9608699 | 1.85E-98    |
| 196 | 51655     | RASD1         | 0.82   | 3.17   | 1.950787  | 5.07E-08    |
| 197 | 8970      | H2BC11        | 8.94   | 34.56  | 1.9507565 | 1.40E-11    |
| 198 | 2672      | GFI1          | 0.81   | 3.13   | 1.9501688 | 7.34E-22    |
| 199 | 221914    | GPC2          | 1.06   | 4.05   | 1.9338576 | 9.35E-15    |
| 200 | 55138     | FAM90A1       | 0.22   | 0.84   | 1.9328858 | 0.001072619 |
| 201 | 388588    | SMIM1         | 46.16  | 175.69 | 1.9283169 | 2.23E-66    |
| 202 | 100129924 | TMEM269       | 0.15   | 0.57   | 1.9259994 | 0.001675538 |
| 203 | 125965    | COX6B2        | 0.22   | 0.83   | 1.9156078 | 0.044989928 |
| 204 | 150483    | TEKT4         | 1.45   | 5.47   | 1.9154879 | 1.36E-11    |
| 205 | 3664      | IRF6          | 0.25   | 0.93   | 1.8953026 | 6.77E-07    |
| 206 | 6899      | TBX1          | 0.77   | 2.86   | 1.8930848 | 7.37E-08    |
| 207 | 122622    | ADSS1         | 0.91   | 3.38   | 1.8930848 | 3.30E-08    |
| 208 | 7022      | TFAP2C        | 0.1    | 0.37   | 1.8875253 | 0.035891366 |
| 209 | 553158    | PRR5-ARHGAP8  | 0.43   | 1.59   | 1.8866182 | 3.29E-05    |
| 210 | 23542     | MAPK8IP2      | 0.06   | 0.22   | 1.8744691 | 0.014800904 |
| 211 | 10391     | CORO2B        | 0.09   | 0.33   | 1.8744691 | 0.023497379 |
| 212 | 376940    | ZC3H6         | 0.41   | 1.5    | 1.8712667 | 1.09E-15    |
| 213 | 106865373 | GET1-SH3BGR   | 0.29   | 1.06   | 1.8699395 | 0.015210398 |
| 214 | 283849    | EXOC3L1       | 0.37   | 1.35   | 1.8673622 | 5.03E-05    |
| 215 | 22801     | ITGA11        | 0.74   | 2.67   | 1.8512426 | 3.58E-36    |
| 216 | 645426    | TMEM191C      | 0.28   | 1.01   | 1.8508566 | 0.023500466 |
| 217 | 130733    | TMEM178A      | 0.73   | 2.59   | 1.8269837 | 1.36E-05    |
| 218 | 3303      | HSPA1A        | 12.43  | 43.99  | 1.8233493 | 7.74E-132   |
| 219 | 5997      | RGS2          | 2.99   | 10.57  | 1.821758  | 1.21E-16    |
| 220 | 285704    | RGMB          | 0.76   | 2.68   | 1.8181617 | 2.91E-16    |
| 221 | 51266     | CLEC1B        | 37.19  | 130.17 | 1.8074103 | 9.56E-105   |
| 222 | 102724965 | LOC102724965  | 0.1    | 0.35   | 1.8073549 | 0.037201173 |
| 223 | 1950      | EGF           | 2.06   | 7.2    | 1.8053526 | 2.22E-48    |
| 224 | 79148     | MMP28         | 0.53   | 1.85   | 1.803461  | 0.009328118 |
| 225 | 1844      | DUSP2         | 2.79   | 9.72   | 1.8006912 | 2.20E-20    |
| 226 | 201299    | RDM1          | 3.18   | 11.04  | 1.7956415 | 6.12E-15    |
| 227 | 27134     | TJP3          | 0.17   | 0.59   | 1.7951802 | 0.003880854 |
| 228 | 155382    | VPS37D        | 0.8    | 2.77   | 1.7918141 | 5.57E-06    |
| 229 | 100129792 | CCDC152       | 0.09   | 0.31   | 1.7842713 | 0.035886845 |
| 230 | 54760     | PCSK4         | 0.85   | 2.92   | 1.7804336 | 4.01E-10    |
| 231 | 388284    | C16orf86      | 0.67   | 2.3    | 1.7794009 | 0.003094907 |
| 232 | 10045     | SH2D3A        | 0.51   | 1.75   | 1.7787858 | 3.22E-05    |
| 233 | 122416    | ANKRD9        | 3.11   | 10.59  | 1.7677161 | 1.87E-73    |
| 234 | 3669      | ISG20         | 0.42   | 1.43   | 1.7675539 | 4.99E-04    |
| 235 | 2104      | ESRRG         | 0.05   | 0.17   | 1.7655347 | 0.023778589 |
| 236 | 199223    | TTC21A        | 0.1    | 0.34   | 1.7655347 | 0.014024024 |
| 237 | 388403    | YPEL2         | 1.03   | 3.5    | 1.7647106 | 4.93E-24    |
| 238 | 105375683 | LOC105375683  | 2.55   | 8.65   | 1.7622029 | 4.44E-11    |
| 239 | 340390    | WDR97         | 0.08   | 0.27   | 1.7548875 | 0.019191487 |
| 240 | 7164      | TPD52L1       | 1.54   | 5.17   | 1.7472339 | 8.57E-05    |
| 241 | 5649      | RELN          | 0.03   | 0.1    | 1.7369656 | 0.02240101  |

|     |           |               |        |        |           |             |
|-----|-----------|---------------|--------|--------|-----------|-------------|
| 242 | 110354863 | ZNF660-ZNF197 | 0.54   | 1.8    | 1.7369656 | 9.66E-19    |
| 243 | 1960      | EGR3          | 0.06   | 0.2    | 1.7369656 | 0.037191846 |
| 244 | 729359    | PLIN4         | 0.06   | 0.2    | 1.7369656 | 0.014025957 |
| 245 | 94241     | TP53INP1      | 1.73   | 5.76   | 1.7352968 | 6.84E-41    |
| 246 | 10347     | ABCA7         | 8.3    | 27.63  | 1.7350523 | 3.08E-203   |
| 247 | 100529144 | CORO7-PAM16   | 0.17   | 0.56   | 1.7198921 | 0.003881446 |
| 248 | 55501     | CHST12        | 6.05   | 19.89  | 1.7170362 | 4.60E-34    |
| 249 | 100310846 | ANKRD61       | 0.35   | 1.15   | 1.716207  | 0.014022091 |
| 250 | 729438    | CASTOR2       | 3.54   | 11.63  | 1.7160298 | 6.61E-28    |
| 251 | 8792      | TNFRSF11A     | 0.11   | 0.36   | 1.7104934 | 0.0074848   |
| 252 | 4647      | MYO7A         | 0.11   | 0.36   | 1.7104934 | 4.13E-04    |
| 253 | 5348      | FXYD1         | 1.54   | 5.03   | 1.707628  | 0.008785321 |
| 254 | 2625      | GATA3         | 0.35   | 1.14   | 1.703607  | 1.11E-04    |
| 255 | 3304      | HSPA1B        | 31.6   | 102.73 | 1.7008611 | 4.02E-294   |
| 256 | 29993     | PACSIN1       | 0.08   | 0.26   | 1.7004397 | 0.033586447 |
| 257 | 100462983 | MTRNR2L3      | 0.55   | 1.78   | 1.6943737 | 0.014020159 |
| 258 | 57731     | SPTBN4        | 0.86   | 2.78   | 1.6926763 | 2.85E-14    |
| 259 | 9871      | SEC24D        | 11.77  | 37.99  | 1.6905054 | 5.95E-180   |
| 260 | 793       | CALB1         | 0.45   | 1.45   | 1.688056  | 4.47E-05    |
| 261 | 604       | BCL6          | 0.27   | 0.87   | 1.688056  | 1.69E-05    |
| 262 | 388327    | C17orf100     | 0.6    | 1.93   | 1.6855664 | 2.48E-04    |
| 263 | 143686    | SESN3         | 1.91   | 6.13   | 1.6823144 | 1.82E-72    |
| 264 | 664       | BNIP3         | 14.98  | 48.02  | 1.6805978 | 4.39E-82    |
| 265 | 3084      | NRG1          | 0.69   | 2.21   | 1.6793781 | 7.16E-04    |
| 266 | 84159     | ARID5B        | 0.3    | 0.96   | 1.6780719 | 2.66E-10    |
| 267 | 57577     | CCDC191       | 0.15   | 0.48   | 1.6780719 | 6.81E-04    |
| 268 | 6035      | RNASE1        | 7.28   | 23.25  | 1.6752204 | 1.07E-19    |
| 269 | 3050      | HBZ           | 101.47 | 322.15 | 1.6666793 | 5.05E-207   |
| 270 | 8337      | H2AC18        | 45.83  | 145.42 | 1.6658615 | 3.68E-46    |
| 271 | 768211    | RELL1         | 0.77   | 2.44   | 1.6639508 | 0.012724986 |
| 272 | 2255      | FGF10         | 0.12   | 0.38   | 1.662965  | 0.00369253  |
| 273 | 92840     | REEP6         | 48.95  | 154.75 | 1.6605586 | 8.34E-207   |
| 274 | 84722     | PSRC1         | 11.24  | 35.52  | 1.6599895 | 8.36E-66    |
| 275 | 225       | ABCD2         | 0.13   | 0.41   | 1.6571123 | 2.76E-04    |
| 276 | 27146     | FAM184B       | 0.07   | 0.22   | 1.6520767 | 0.009326786 |
| 277 | 55150     | C19orf73      | 0.86   | 2.7    | 1.6505508 | 0.020900884 |
| 278 | 50865     | HEBP1         | 15.5   | 48.63  | 1.6495784 | 7.64E-53    |
| 279 | 3135      | HLA-G         | 6.96   | 21.82  | 1.6484919 | 2.12E-15    |
| 280 | 23659     | PLA2G15       | 3.88   | 12.13  | 1.644451  | 1.45E-35    |
| 281 | 7923      | HSD17B8       | 1.9    | 5.93   | 1.6420327 | 6.77E-06    |
| 282 | 79990     | PLEKHH3       | 5.77   | 18     | 1.6413537 | 1.31E-62    |
| 283 | 25822     | DNAJB5        | 1.28   | 3.99   | 1.6402449 | 5.77E-12    |
| 284 | 2335      | FN1           | 0.61   | 1.9    | 1.6391183 | 4.81E-18    |
| 285 | 54478     | PIMREG        | 0.53   | 1.65   | 1.6384018 | 5.40E-04    |
| 286 | 144717    | PHETA1        | 4.41   | 13.68  | 1.6332177 | 2.33E-37    |
| 287 | 150921    | TCF23         | 0.1    | 0.31   | 1.6322682 | 0.013100946 |
| 288 | 221002    | RASGEF1A      | 1.06   | 3.28   | 1.6296316 | 1.83E-06    |
| 289 | 718       | C3            | 0.87   | 2.69   | 1.6285189 | 6.05E-17    |
| 290 | 120071    | LARGE2        | 0.49   | 1.51   | 1.6236949 | 8.56E-05    |
| 291 | 1515      | CTSV          | 0.74   | 2.28   | 1.6234366 | 5.10E-12    |
| 292 | 3162      | HMOX1         | 1.36   | 4.19   | 1.6233436 | 2.98E-07    |
| 293 | 10509     | SEMA4B        | 14.12  | 43.38  | 1.61929   | 5.45E-183   |
| 294 | 55357     | TBC1D2        | 0.56   | 1.72   | 1.6189098 | 3.16E-06    |
| 295 | 8654      | PDE5A         | 2.21   | 6.77   | 1.6151095 | 4.19E-49    |
| 296 | 339456    | TMEM52        | 1.31   | 4.01   | 1.6140354 | 5.40E-04    |
| 297 | 26207     | PITPNC1       | 3.1    | 9.48   | 1.6126188 | 6.35E-69    |
| 298 | 8646      | CHRD          | 0.18   | 0.55   | 1.6114347 | 0.003693096 |
| 299 | 246721    | POLR2J2       | 1.76   | 5.35   | 1.6039635 | 1.10E-11    |
| 300 | 8343      | H2BC7         | 3.96   | 12.02  | 1.6018646 | 0.001263346 |
| 301 | 9026      | HIP1R         | 6.32   | 19.17  | 1.6008539 | 7.05E-87    |
| 302 | 5794      | PTPRH         | 1.93   | 5.84   | 1.5973675 | 1.00E-24    |

|     |           |              |       |        |           |             |
|-----|-----------|--------------|-------|--------|-----------|-------------|
| 303 | 23493     | HEY2         | 3.51  | 10.62  | 1.5972408 | 1.48E-29    |
| 304 | 282974    | STK32C       | 6.32  | 19.11  | 1.5963313 | 1.34E-08    |
| 305 | 56139     | PCDHA10      | 0     | 0.03   | 1.5849625 | 0.039630968 |
| 306 | 9249      | DHRS3        | 10.96 | 32.88  | 1.5849625 | 9.88E-43    |
| 307 | 721       | C4B          | 0.17  | 0.51   | 1.5849625 | 3.92E-04    |
| 308 | 374977    | MROH7        | 0.12  | 0.36   | 1.5849625 | 0.01309912  |
| 309 | 1382      | CRABP2       | 0.48  | 1.44   | 1.5849625 | 0.049676958 |
| 310 | 387763    | C11orf96     | 10.37 | 31.09  | 1.5840347 | 3.70E-35    |
| 311 | 79873     | NUDT18       | 1.62  | 4.84   | 1.5790132 | 1.04E-07    |
| 312 | 100128071 | FAM229A      | 2.35  | 7      | 1.5746942 | 3.15E-04    |
| 313 | 3800      | KIF5C        | 0.74  | 2.2    | 1.5719063 | 2.82E-15    |
| 314 | 84992     | PIGY         | 17.83 | 52.87  | 1.5681426 | 4.29E-65    |
| 315 | 57561     | ARRDC3       | 2.13  | 6.31   | 1.5667866 | 4.64E-29    |
| 316 | 84960     | CCDC183      | 0.37  | 1.09   | 1.558731  | 0.012003445 |
| 317 | 4294      | MAP3K10      | 2.19  | 6.44   | 1.5561298 | 7.47E-19    |
| 318 | 148534    | TLCD4        | 0.98  | 2.88   | 1.5552152 | 4.53E-22    |
| 319 | 8153      | RND2         | 0.16  | 0.47   | 1.5545889 | 0.005122062 |
| 320 | 9024      | BRSK2        | 1.03  | 3.02   | 1.5519042 | 4.10E-14    |
| 321 | 57716     | PRX          | 0.8   | 2.34   | 1.5484366 | 6.71E-12    |
| 322 | 8630      | HSD17B6      | 0.63  | 1.84   | 1.546282  | 0.003124479 |
| 323 | 80235     | PIGZ         | 0.21  | 0.61   | 1.5384199 | 0.006238667 |
| 324 | 55321     | TMEM74B      | 1.51  | 4.38   | 1.5363823 | 1.18E-07    |
| 325 | 8577      | TMEFF1       | 1.45  | 4.2    | 1.5343364 | 1.21E-11    |
| 326 | 79094     | CHAC1        | 26.98 | 78.05  | 1.5325083 | 2.92E-108   |
| 327 | 8349      | H2BC21       | 6.94  | 20.04  | 1.5298749 | 1.78E-43    |
| 328 | 467       | ATF3         | 5.31  | 15.28  | 1.5248608 | 3.35E-29    |
| 329 | 8676      | STX11        | 3.08  | 8.86   | 1.5243763 | 2.85E-38    |
| 330 | 117247    | SLC16A10     | 1.92  | 5.52   | 1.523562  | 8.68E-07    |
| 331 | 84144     | SYDE2        | 3.62  | 10.39  | 1.5211341 | 7.50E-53    |
| 332 | 113230    | MISP3        | 2.57  | 7.37   | 1.5198963 | 8.53E-11    |
| 333 | 101928120 | LOC101928120 | 0.45  | 1.29   | 1.5193742 | 0.022398055 |
| 334 | 2318      | FLNC         | 2.45  | 7.01   | 1.5166327 | 8.80E-68    |
| 335 | 2264      | FGFR4        | 3.39  | 9.67   | 1.5122306 | 7.77E-30    |
| 336 | 28227     | PPP2R3B      | 4.53  | 12.9   | 1.5097881 | 1.06E-30    |
| 337 | 105372704 | LOC105372704 | 0.57  | 1.62   | 1.50696   | 0.002687876 |
| 338 | 114822    | RHPN1        | 4.07  | 11.56  | 1.5060407 | 1.68E-43    |
| 339 | 81027     | TUBB1        | 3.78  | 10.72  | 1.5038468 | 2.00E-35    |
| 340 | 84073     | MYCBPAP      | 0.53  | 1.5    | 1.5008982 | 1.01E-04    |
| 341 | 642658    | SCX          | 0.88  | 2.49   | 1.5005703 | 0.002579604 |
| 342 | 2802      | GOLGA3       | 6.49  | 18.36  | 1.5002757 | 5.03E-96    |
| 343 | 800       | CALD1        | 4.27  | 12.06  | 1.4979219 | 1.04E-55    |
| 344 | 1821      | DRP2         | 0.17  | 0.48   | 1.4974997 | 1.82E-04    |
| 345 | 3006      | H1-2         | 228.3 | 644.52 | 1.4972943 | 0           |
| 346 | 6261      | RYR1         | 0.5   | 1.41   | 1.4956952 | 1.89E-23    |
| 347 | 10297     | APC2         | 0.11  | 0.31   | 1.4947647 | 6.04E-04    |
| 348 | 440087    | SMCO3        | 0.11  | 0.31   | 1.4947647 | 0.023494293 |
| 349 | 28986     | MAGEH1       | 7.01  | 19.74  | 1.4936356 | 5.46E-25    |
| 350 | 148641    | SLC35F3      | 0.21  | 0.59   | 1.4903256 | 0.010908293 |
| 351 | 79741     | CCDC7        | 0.26  | 0.73   | 1.4893848 | 0.019926555 |
| 352 | 150051    | LOC150051    | 3.94  | 11.06  | 1.4890839 | 2.46E-07    |
| 353 | 10811     | NOXA1        | 0.31  | 0.87   | 1.4887472 | 0.044995464 |
| 354 | 760       | CA2          | 32.29 | 90.62  | 1.4887421 | 2.25E-122   |
| 355 | 726       | CAPN5        | 2.72  | 7.62   | 1.4861843 | 1.99E-33    |
| 356 | 254013    | ETFBKMT      | 0.1   | 0.28   | 1.4854268 | 0.015662699 |
| 357 | 8728      | ADAM19       | 0.89  | 2.49   | 1.4842685 | 2.49E-17    |
| 358 | 212       | ALAS2        | 9.78  | 27.34  | 1.4831069 | 6.97E-47    |
| 359 | 6909      | TBX2         | 7.7   | 21.52  | 1.4827477 | 1.51E-71    |
| 360 | 2633      | GBP1         | 1.07  | 2.99   | 1.4825347 | 3.04E-09    |
| 361 | 388228    | SBK1         | 0.33  | 0.92   | 1.4791678 | 1.67E-05    |
| 362 | 140706    | CCM2L        | 1.22  | 3.4    | 1.4786536 | 3.67E-09    |
| 363 | 51129     | ANGPTL4      | 0.59  | 1.64   | 1.474909  | 0.001529599 |

|     |           |               |        |         |           |             |
|-----|-----------|---------------|--------|---------|-----------|-------------|
| 364 | 3005      | H1-0          | 668.07 | 1854.01 | 1.4725778 | 0           |
| 365 | 130271    | PLEKHH2       | 1.33   | 3.69    | 1.4721946 | 8.47E-25    |
| 366 | 8341      | H2BC15        | 5.45   | 15.12   | 1.47213   | 5.46E-05    |
| 367 | 8339      | H2BC8         | 8.27   | 22.89   | 1.4687582 | 7.89E-06    |
| 368 | 10953     | TOMM34        | 10.22  | 28.24   | 1.4663449 | 8.76E-50    |
| 369 | 55638     | SYBU          | 0.29   | 0.8     | 1.4639471 | 0.00700816  |
| 370 | 7349      | UCN           | 2.95   | 8.13    | 1.4625404 | 3.45E-05    |
| 371 | 4207      | BORCS8-MEF2B  | 1.41   | 3.88    | 1.4603615 | 8.71E-06    |
| 372 | 23492     | CBX7          | 1.07   | 2.94    | 1.4582054 | 2.94E-12    |
| 373 | 4137      | MAPT          | 0.82   | 2.25    | 1.4562292 | 2.31E-13    |
| 374 | 2801      | GOLGA2        | 13.04  | 35.67   | 1.4517673 | 1.25E-143   |
| 375 | 10699     | CORIN         | 0.26   | 0.71    | 1.4493074 | 0.031118977 |
| 376 | 645       | BLVRB         | 164.13 | 447.25  | 1.4462425 | 1.64E-233   |
| 377 | 5641      | LGMN          | 2.83   | 7.71    | 1.4459288 | 1.53E-13    |
| 378 | 8924      | HERC2         | 33.25  | 90.56   | 1.4455196 | 0           |
| 379 | 3299      | HSF4          | 0.93   | 2.53    | 1.4438348 | 2.62E-07    |
| 380 | 144100    | PLEKHA7       | 10.51  | 28.59   | 1.443748  | 1.06E-147   |
| 381 | 8635      | RNASET2       | 13.31  | 36.18   | 1.4426818 | 1.24E-33    |
| 382 | 124790    | HEXIM2        | 3.33   | 9.05    | 1.4423956 | 3.47E-08    |
| 383 | 3339      | HSPG2         | 17.51  | 47.56   | 1.4415696 | 0           |
| 384 | 441150    | C6orf226      | 7.75   | 21.04   | 1.4408665 | 1.04E-06    |
| 385 | 1768      | DNAH6         | 0.07   | 0.19    | 1.4405726 | 0.005556477 |
| 386 | 8853      | ASAP2         | 1.29   | 3.5     | 1.4399839 | 8.25E-19    |
| 387 | 57801     | HES4          | 3.73   | 10.1    | 1.4371078 | 1.18E-08    |
| 388 | 126147    | NTN5          | 0.41   | 1.11    | 1.4368639 | 0.012572614 |
| 389 | 1613      | DAPK3         | 7.49   | 20.27   | 1.4363085 | 2.52E-39    |
| 390 | 267       | AMFR          | 27.6   | 74.69   | 1.4362468 | 2.45E-264   |
| 391 | 2064      | ERBB2         | 1.39   | 3.76    | 1.4356478 | 6.23E-18    |
| 392 | 22927     | HABP4         | 3.15   | 8.51    | 1.4338073 | 2.47E-21    |
| 393 | 27175     | TUBG2         | 2.34   | 6.32    | 1.433416  | 1.16E-08    |
| 394 | 135154    | SDHAF4        | 3.24   | 8.75    | 1.4332892 | 9.81E-09    |
| 395 | 2308      | FOXO1         | 0.58   | 1.56    | 1.4274212 | 1.59E-09    |
| 396 | 9820      | CUL7          | 6.06   | 16.29   | 1.4265969 | 1.84E-78    |
| 397 | 136541    | PRSS58        | 2.51   | 6.72    | 1.4207739 | 4.47E-05    |
| 398 | 29775     | CARD10        | 0.4    | 1.07    | 1.4195389 | 7.06E-05    |
| 399 | 347733    | TUBB2B        | 0.88   | 2.35    | 1.4170853 | 8.67E-05    |
| 400 | 1843      | DUSP1         | 7.82   | 20.88   | 1.4168812 | 4.70E-36    |
| 401 | 9751      | SNPH          | 1.51   | 4.03    | 1.4162313 | 2.01E-19    |
| 402 | 8412      | BCAR3         | 0.18   | 0.48    | 1.4150375 | 0.025136947 |
| 403 | 55753     | OGDHL         | 0.3    | 0.8     | 1.4150375 | 0.001379005 |
| 404 | 43        | ACHE          | 0.36   | 0.96    | 1.4150375 | 0.005557307 |
| 405 | 2634      | GBP2          | 0.44   | 1.17    | 1.4109331 | 2.82E-05    |
| 406 | 9643      | MORF4L2       | 46.24  | 122.79  | 1.4089798 | 2.89E-190   |
| 407 | 65124     | SOWAHC        | 0.23   | 0.61    | 1.4071754 | 0.001972895 |
| 408 | 55693     | KDM4D         | 0.23   | 0.61    | 1.4071754 | 0.015666967 |
| 409 | 91828     | EXOC3L4       | 2.32   | 6.13    | 1.4017623 | 1.59E-16    |
| 410 | 658       | BMPR1B        | 0.19   | 0.5     | 1.3959287 | 0.002796079 |
| 411 | 647042    | GOLGA6L10     | 0.97   | 2.55    | 1.3944406 | 9.81E-04    |
| 412 | 7286      | TUFT1         | 0.85   | 2.23    | 1.391509  | 8.47E-07    |
| 413 | 23428     | SLC7A8        | 2.57   | 6.74    | 1.3909802 | 1.48E-18    |
| 414 | 441525    | SPANXN4       | 3.05   | 7.99    | 1.3893863 | 0.027962718 |
| 415 | 163259    | DENND2C       | 0.68   | 1.78    | 1.3882706 | 3.38E-11    |
| 416 | 7755      | ZNF205        | 1.81   | 4.73    | 1.3858505 | 5.09E-09    |
| 417 | 4192      | MDK           | 146.68 | 383.1   | 1.3850489 | 2.49E-211   |
| 418 | 142678    | MIB2          | 3.45   | 9.01    | 1.3849307 | 4.80E-23    |
| 419 | 110116772 | ZNF765-ZNF761 | 0.54   | 1.41    | 1.3846639 | 8.71E-08    |
| 420 | 51390     | AIG1          | 2      | 5.22    | 1.3840498 | 0.035670063 |
| 421 | 10501     | SEMA6B        | 2.76   | 7.17    | 1.3773049 | 1.20E-24    |
| 422 | 8352      | H3C3          | 4.35   | 11.3    | 1.3772355 | 0.00441693  |
| 423 | 27242     | TNFRSF21      | 0.52   | 1.35    | 1.3763759 | 0.007582528 |
| 424 | 9658      | ZNF516        | 1.78   | 4.62    | 1.3760156 | 5.02E-17    |

|     |           |                |        |        |           |             |
|-----|-----------|----------------|--------|--------|-----------|-------------|
| 425 | 10669     | CGREF1         | 0.37   | 0.96   | 1.3755091 | 0.017433583 |
| 426 | 123688    | HYKK           | 2.17   | 5.63   | 1.3754399 | 3.37E-04    |
| 427 | 79778     | MICALL2        | 9.43   | 24.37  | 1.3697766 | 7.68E-67    |
| 428 | 222962    | SLC29A4        | 0.84   | 2.17   | 1.3692338 | 7.88E-06    |
| 429 | 6038      | RNASE4         | 0.33   | 0.85   | 1.3649968 | 0.031739923 |
| 430 | 51252     | FAM178B        | 5.83   | 15.01  | 1.3643562 | 4.31E-09    |
| 431 | 5129      | CDK18          | 5.38   | 13.84  | 1.3631659 | 2.42E-36    |
| 432 | 146330    | FBXL16         | 0.21   | 0.54   | 1.3625701 | 0.014044527 |
| 433 | 29906     | ST8SIA5        | 0.58   | 1.49   | 1.3611875 | 0.008730019 |
| 434 | 154661    | RUNDC3B        | 0.37   | 0.95   | 1.3604022 | 5.39E-05    |
| 435 | 84210     | ANKRD20A1      | 1.13   | 2.89   | 1.3547467 | 2.03E-10    |
| 436 | 3270      | HRC            | 1.71   | 4.37   | 1.353637  | 1.06E-08    |
| 437 | 100820829 | MYZAP          | 110.09 | 281.12 | 1.3525027 | 0           |
| 438 | 100526772 | STIMATE-MUSTN1 | 1.2    | 3.06   | 1.3504972 | 3.97E-04    |
| 439 | 1052      | CEBPD          | 2.74   | 6.97   | 1.3469828 | 4.93E-07    |
| 440 | 79955     | PDZD7          | 0.48   | 1.22   | 1.3457748 | 0.013190614 |
| 441 | 80119     | PIF1           | 11.94  | 30.34  | 1.3454182 | 6.24E-66    |
| 442 | 23645     | PPP1R15A       | 73.81  | 187.35 | 1.3438478 | 0           |
| 443 | 2913      | GRM3           | 0.58   | 1.47   | 1.3416914 | 4.52E-05    |
| 444 | 1466      | CSRP2          | 2.21   | 5.6    | 1.3413805 | 4.98E-04    |
| 445 | 140576    | S100A16        | 0.75   | 1.9    | 1.3410369 | 0.019934536 |
| 446 | 54922     | RASIP1         | 2.16   | 5.47   | 1.3405095 | 2.62E-15    |
| 447 | 6794      | STK11          | 26.87  | 68.02  | 1.3399627 | 1.12E-184   |
| 448 | 3008      | H1-4           | 2.34   | 5.92   | 1.3390886 | 0.001400645 |
| 449 | 6237      | RRAS           | 34.85  | 88.16  | 1.3389656 | 2.88E-56    |
| 450 | 148229    | ATP8B3         | 0.19   | 0.48   | 1.337035  | 0.015664833 |
| 451 | 112268350 | LOC112268350   | 0.21   | 0.53   | 1.335603  | 0.040233183 |
| 452 | 928       | CD9            | 55.08  | 138.93 | 1.3347577 | 5.58E-119   |
| 453 | 84787     | KMT5C          | 12.6   | 31.74  | 1.3328784 | 1.35E-53    |
| 454 | 114134    | SLC2A13        | 1.38   | 3.47   | 1.3302674 | 0.041840735 |
| 455 | 10309     | CCNO           | 1.11   | 2.79   | 1.3297054 | 0.001400875 |
| 456 | 23409     | SIRT4          | 0.43   | 1.08   | 1.3286227 | 0.044567499 |
| 457 | 255758    | TCTEX1D2       | 2.66   | 6.68   | 1.3284219 | 0.00623959  |
| 458 | 83999     | KREMEN1        | 2.58   | 6.46   | 1.3241631 | 4.75E-34    |
| 459 | 9510      | ADAMTS1        | 1.43   | 3.58   | 1.3239444 | 3.11E-16    |
| 460 | 130951    | M1AP           | 0.36   | 0.9    | 1.3219281 | 0.031743971 |
| 461 | 255394    | TCP11L2        | 0.32   | 0.8    | 1.3219281 | 0.015561194 |
| 462 | 3782      | KCNN3          | 0.12   | 0.3    | 1.3219281 | 2.82E-04    |
| 463 | 4783      | NFIL3          | 4.36   | 10.89  | 1.3206039 | 8.46E-18    |
| 464 | 7328      | UBE2H          | 6.05   | 15.07  | 1.3166724 | 1.12E-64    |
| 465 | 90390     | MED30          | 25.13  | 62.59  | 1.3165215 | 1.51E-39    |
| 466 | 113452    | TMEM54         | 14.21  | 35.38  | 1.3160275 | 1.10E-23    |
| 467 | 219833    | C11orf45       | 0.6    | 1.49   | 1.3122779 | 4.52E-05    |
| 468 | 200879    | LIPH           | 2.94   | 7.3    | 1.3120803 | 5.69E-22    |
| 469 | 1649      | DDIT3          | 19.6   | 48.66  | 1.3118827 | 9.03E-29    |
| 470 | 64746     | ACBD3          | 9.07   | 22.51  | 1.3113916 | 3.18E-65    |
| 471 | 64400     | AKTIP          | 1.31   | 3.25   | 1.3108729 | 3.35E-05    |
| 472 | 55034     | MOCOS          | 0.5    | 1.24   | 1.3103401 | 4.38E-07    |
| 473 | 5795      | PTPRJ          | 0.82   | 2.03   | 1.3077839 | 6.67E-05    |
| 474 | 5333      | PLCD1          | 3.58   | 8.86   | 1.3073471 | 1.62E-19    |
| 475 | 7869      | SEMA3B         | 0.49   | 1.21   | 1.3041534 | 0.01319245  |
| 476 | 221908    | PPP1R35        | 20.18  | 49.83  | 1.3040884 | 5.06E-30    |
| 477 | 9659      | PDE4DIP        | 13.88  | 34.26  | 1.3035176 | 1.09E-64    |
| 478 | 8996      | NOL3           | 2.47   | 6.09   | 1.3019312 | 2.42E-07    |
| 479 | 11092     | SPACA9         | 1.3    | 3.2    | 1.2995603 | 0.011616631 |
| 480 | 10848     | PPP1R13L       | 1.66   | 4.08   | 1.2973859 | 2.11E-09    |
| 481 | 203328    | SUSD3          | 11.33  | 27.84  | 1.2970114 | 4.28E-23    |
| 482 | 100526761 | CCDC169-SOHLH2 | 1.36   | 3.34   | 1.2962415 | 1.59E-07    |
| 483 | 146664    | MGAT5B         | 0.11   | 0.27   | 1.2954559 | 0.045001002 |
| 484 | 51313     | GASK1B         | 0.38   | 0.93   | 1.2912313 | 1.42E-04    |
| 485 | 8971      | H1-10          | 138.57 | 337.81 | 1.2855971 | 0           |



|     |           |              |        |        |           |             |
|-----|-----------|--------------|--------|--------|-----------|-------------|
| 486 | 399668    | SMIM10L2A    | 0.16   | 0.39   | 1.2854022 | 0.015563315 |
| 487 | 23005     | MAPKBP1      | 5.25   | 12.75  | 1.2801079 | 2.76E-74    |
| 488 | 55565     | ZNF821       | 2.55   | 6.18   | 1.2771096 | 3.84E-09    |
| 489 | 146909    | KIF18B       | 19.87  | 48.12  | 1.2760448 | 5.46E-151   |
| 490 | 7291      | TWIST1       | 0.69   | 1.67   | 1.2751798 | 0.008699454 |
| 491 | 23753     | SDF2L1       | 36.74  | 88.91  | 1.2749941 | 9.72E-41    |
| 492 | 284131    | ENDOV        | 1.6    | 3.87   | 1.2742617 | 0.003284085 |
| 493 | 10484     | SEC23A       | 10.13  | 24.46  | 1.2717902 | 2.40E-55    |
| 494 | 8795      | TNFRSF10B    | 1.43   | 3.45   | 1.2705812 | 2.56E-11    |
| 495 | 3600      | IL15         | 1.77   | 4.27   | 1.2704867 | 9.54E-08    |
| 496 | 1832      | DSP          | 1.02   | 2.46   | 1.2700892 | 5.57E-18    |
| 497 | 347736    | NME9         | 0.42   | 1.01   | 1.2658941 | 0.019478463 |
| 498 | 84258     | SYT3         | 0.57   | 1.37   | 1.2651421 | 7.88E-04    |
| 499 | 7942      | TFEB         | 3.71   | 8.9    | 1.2623861 | 2.19E-16    |
| 500 | 57648     | KIAA1522     | 18.77  | 44.94  | 1.2595715 | 2.05E-130   |
| 501 | 58526     | MID1IP1      | 41.48  | 99.22  | 1.2582151 | 1.61E-171   |
| 502 | 351       | APP          | 1.23   | 2.94   | 1.2571578 | 3.00E-04    |
| 503 | 23149     | FCHO1        | 3.13   | 7.48   | 1.2568756 | 1.72E-17    |
| 504 | 79363     | CPLANE2      | 0.98   | 2.34   | 1.2556549 | 0.0024208   |
| 505 | 85302     | FBF1         | 1.78   | 4.25   | 1.2555856 | 5.58E-16    |
| 506 | 23551     | RASD2        | 0.21   | 0.5    | 1.2515388 | 0.019929215 |
| 507 | 3107      | HLA-C        | 318.14 | 757.17 | 1.2509555 | 0           |
| 508 | 374887    | YJEFN3       | 2.47   | 5.87   | 1.2488495 | 2.66E-04    |
| 509 | 90362     | FAM110B      | 4.27   | 10.13  | 1.2463262 | 6.51E-26    |
| 510 | 112268052 | LOC112268052 | 0.71   | 1.68   | 1.2425703 | 0.028034466 |
| 511 | 10817     | FRS3         | 3.78   | 8.94   | 1.2418886 | 1.40E-12    |
| 512 | 151011    | SEPTIN10     | 7.43   | 17.55  | 1.2400369 | 5.75E-34    |
| 513 | 7922      | SLC39A7      | 60.03  | 141.37 | 1.2357204 | 1.61E-200   |
| 514 | 83874     | TBC1D10A     | 2.76   | 6.49   | 1.2335502 | 1.41E-09    |
| 515 | 80325     | ABTB1        | 3.42   | 8.04   | 1.2331992 | 1.51E-11    |
| 516 | 10298     | PAK4         | 16.52  | 38.82  | 1.2325864 | 4.20E-81    |
| 517 | 9783      | RIMS3        | 6.1    | 14.33  | 1.2321575 | 1.27E-79    |
| 518 | 63971     | KIF13A       | 9.51   | 22.33  | 1.231466  | 7.89E-04    |
| 519 | 1757      | SARDH        | 0.52   | 1.22   | 1.2302976 | 0.001053929 |
| 520 | 221       | ALDH3B1      | 0.84   | 1.97   | 1.2297344 | 1.21E-04    |
| 521 | 339210    | C17orf67     | 0.87   | 2.04   | 1.2294818 | 0.001053752 |
| 522 | 828       | CAPS         | 0.64   | 1.5    | 1.2288187 | 0.021682265 |
| 523 | 27303     | RBMS3        | 0.68   | 1.59   | 1.2254201 | 1.55E-07    |
| 524 | 11015     | KDELR3       | 7.91   | 18.49  | 1.2249956 | 8.31E-15    |
| 525 | 100528064 | NEDD8-MDP1   | 3.57   | 8.33   | 1.2223924 | 3.34E-04    |
| 526 | 153       | ADRB1        | 0.36   | 0.84   | 1.2223924 | 0.010626041 |
| 527 | 84264     | HAGHL        | 9.58   | 22.35  | 1.2221773 | 1.11E-17    |
| 528 | 51439     | FAM8A1       | 7.49   | 17.44  | 1.2193624 | 7.02E-61    |
| 529 | 6352      | CCL5         | 1.72   | 4      | 1.2175914 | 4.85E-04    |
| 530 | 8527      | DGKD         | 18.06  | 41.99  | 1.2172479 | 3.87E-198   |
| 531 | 63924     | CIDEC        | 0.96   | 2.23   | 1.2159374 | 0.034164111 |
| 532 | 51312     | SLC25A37     | 95.26  | 221.25 | 1.215735  | 0           |
| 533 | 124401    | ANKS3        | 2.96   | 6.87   | 1.2147129 | 1.02E-08    |
| 534 | 157378    | TMEM65       | 6.2    | 14.38  | 1.2137236 | 2.67E-45    |
| 535 | 27338     | UBE2S        | 130.6  | 302.8  | 1.2132103 | 0           |
| 536 | 8331      | H2AC14       | 3.18   | 7.37   | 1.2126379 | 0.044572994 |
| 537 | 56413     | LTB4R2       | 2.24   | 5.19   | 1.2122358 | 5.06E-06    |
| 538 | 8541      | PPFIA3       | 6.96   | 16.1   | 1.2099015 | 1.23E-54    |
| 539 | 100316904 | SAP25        | 4.51   | 10.43  | 1.2095398 | 2.56E-08    |
| 540 | 10468     | FST          | 1.12   | 2.59   | 1.2094534 | 0.007513489 |
| 541 | 84261     | FBXW9        | 3.17   | 7.33   | 1.2093304 | 9.36E-09    |
| 542 | 883       | KYAT1        | 8.36   | 19.33  | 1.2092668 | 6.97E-25    |
| 543 | 2109      | ETFB         | 37.77  | 87.3   | 1.2087409 | 6.49E-40    |
| 544 | 54997     | TESC         | 128.64 | 296.95 | 1.2068807 | 8.72E-161   |
| 545 | 7263      | TST          | 5.82   | 13.42  | 1.2052936 | 1.62E-09    |
| 546 | 5996      | RGS1         | 2.36   | 5.44   | 1.2048198 | 2.33E-05    |

|     |           |              |        |        |           |             |
|-----|-----------|--------------|--------|--------|-----------|-------------|
| 547 | 1051      | CEBPB        | 17.42  | 40.12  | 1.203577  | 7.38E-49    |
| 548 | 57719     | ANO8         | 3.01   | 6.93   | 1.2030919 | 9.49E-24    |
| 549 | 79144     | PPDPF        | 114.52 | 263.54 | 1.2024224 | 4.54E-109   |
| 550 | 402573    | C7orf61      | 1.5    | 3.45   | 1.2016339 | 0.00931381  |
| 551 | 9021      | SOCS3        | 32.14  | 73.83  | 1.1998372 | 1.37E-137   |
| 552 | 92797     | HELB         | 0.95   | 2.18   | 1.1983287 | 1.52E-05    |
| 553 | 92960     | PEX11G       | 0.92   | 2.11   | 1.1975372 | 0.046856198 |
| 554 | 100996928 | FMC1-LUC7L2  | 3.67   | 8.41   | 1.1963257 | 2.18E-16    |
| 555 | 54805     | CNNM2        | 3.14   | 7.19   | 1.1952272 | 2.57E-16    |
| 556 | 9811      | CTIF         | 3.28   | 7.51   | 1.1951171 | 2.58E-32    |
| 557 | 225689    | MAPK15       | 0.38   | 0.87   | 1.195016  | 0.019931875 |
| 558 | 64856     | VWA1         | 0.21   | 0.48   | 1.1926451 | 0.035504203 |
| 559 | 29899     | GPSM2        | 6.56   | 14.97  | 1.1903065 | 6.77E-42    |
| 560 | 200958    | MUC20        | 0.32   | 0.73   | 1.1898246 | 0.039028119 |
| 561 | 11093     | ADAMTS13     | 0.18   | 0.41   | 1.187627  | 0.028030843 |
| 562 | 57511     | COG6         | 8.48   | 19.3   | 1.1864647 | 1.91E-48    |
| 563 | 59084     | ENPP5        | 1.2    | 2.73   | 1.1858665 | 5.82E-08    |
| 564 | 868       | CBLB         | 1.92   | 4.36   | 1.1832218 | 3.98E-19    |
| 565 | 127687    | C1orf122     | 32.7   | 74.13  | 1.1807669 | 2.42E-50    |
| 566 | 4804      | NGFR         | 1.35   | 3.06   | 1.1805722 | 5.83E-08    |
| 567 | 1039      | CDR2         | 11.69  | 26.48  | 1.1796282 | 1.60E-47    |
| 568 | 339122    | RAB43        | 1.4    | 3.17   | 1.179056  | 5.40E-11    |
| 569 | 64064     | OXCT2        | 1.29   | 2.92   | 1.1785973 | 3.11E-04    |
| 570 | 79845     | RNF122       | 3.82   | 8.64   | 1.1774587 | 5.37E-11    |
| 571 | 51696     | HECA         | 7.5    | 16.96  | 1.1771737 | 1.27E-67    |
| 572 | 101060321 | TBC1D3G      | 1.15   | 2.6    | 1.1768778 | 5.49E-08    |
| 573 | 90249     | UNC5A        | 0.23   | 0.52   | 1.1768778 | 0.029841303 |
| 574 | 3619      | INCENP       | 20.74  | 46.84  | 1.1753252 | 2.70E-125   |
| 575 | 283152    | CCDC153      | 3.3    | 7.45   | 1.1747744 | 9.82E-07    |
| 576 | 283248    | RCOR2        | 3.93   | 8.87   | 1.1744048 | 6.80E-18    |
| 577 | 144608    | C12orf60     | 1.39   | 3.13   | 1.1710778 | 0.024224126 |
| 578 | 1316      | KLF6         | 2.23   | 5.02   | 1.1706437 | 1.47E-16    |
| 579 | 400916    | CHCHD10      | 89.88  | 202.28 | 1.1702817 | 7.70E-62    |
| 580 | 115704    | EVI5L        | 2.45   | 5.51   | 1.1692706 | 2.81E-15    |
| 581 | 5002      | SLC22A18     | 1.37   | 3.08   | 1.1687545 | 5.48E-04    |
| 582 | 57821     | CCDC181      | 0.45   | 1.01   | 1.1663584 | 0.046850465 |
| 583 | 64386     | MMP25        | 0.33   | 0.74   | 1.1650592 | 0.021685139 |
| 584 | 9531      | BAG3         | 12.93  | 28.96  | 1.1633393 | 3.13E-48    |
| 585 | 160364    | CLEC12A      | 1.68   | 3.76   | 1.1622714 | 7.77E-04    |
| 586 | 25766     | PRPF40B      | 1.65   | 3.69   | 1.1611548 | 3.82E-09    |
| 587 | 11037     | STON1        | 2.33   | 5.21   | 1.1609534 | 9.78E-21    |
| 588 | 9060      | PAPSS2       | 5.86   | 13.1   | 1.1605942 | 1.02E-32    |
| 589 | 2260      | FGFR1        | 0.17   | 0.38   | 1.1604647 | 0.047809928 |
| 590 | 23224     | SYNE2        | 0.34   | 0.76   | 1.1604647 | 0.007146877 |
| 591 | 7781      | SLC30A3      | 14.17  | 31.63  | 1.1584538 | 4.07E-50    |
| 592 | 57524     | CASKIN1      | 0.8    | 1.78   | 1.1538053 | 4.53E-08    |
| 593 | 10312     | TCIRG1       | 26.01  | 57.87  | 1.1537492 | 7.06E-109   |
| 594 | 5027      | P2RX7        | 0.95   | 2.11   | 1.1512436 | 2.25E-08    |
| 595 | 51379     | CRLF3        | 16.14  | 35.83  | 1.1505275 | 3.01E-66    |
| 596 | 9605      | VPS9D1       | 1.56   | 3.46   | 1.149226  | 2.57E-05    |
| 597 | 5238      | PGM3         | 5.16   | 11.44  | 1.1486441 | 6.08E-28    |
| 598 | 22839     | DLGAP4       | 18.86  | 41.8   | 1.1481733 | 2.17E-84    |
| 599 | 7137      | TNNI3        | 9.63   | 21.33  | 1.1472763 | 2.71E-09    |
| 600 | 6303      | SAT1         | 24.72  | 54.75  | 1.1471802 | 4.71E-33    |
| 601 | 6535      | SLC6A8       | 2.33   | 5.15   | 1.1442425 | 5.28E-15    |
| 602 | 7262      | PHLDA2       | 2.79   | 6.16   | 1.1426652 | 0.00116212  |
| 603 | 3977      | LIFR         | 0.29   | 0.64   | 1.142019  | 1.22E-05    |
| 604 | 3490      | IGFBP7       | 0.88   | 1.94   | 1.1404812 | 0.026846643 |
| 605 | 112268238 | LOC112268238 | 1.38   | 3.04   | 1.1394031 | 6.57E-04    |
| 606 | 7220      | TRPC1        | 3.07   | 6.76   | 1.1387846 | 1.17E-19    |
| 607 | 85456     | TNKS1BP1     | 9.19   | 20.23  | 1.1383596 | 4.94E-79    |

|     |        |           |        |        |           |             |
|-----|--------|-----------|--------|--------|-----------|-------------|
| 608 | 55227  | LRR1      | 2.49   | 5.48   | 1.1380302 | 1.15E-12    |
| 609 | 56935  | SMCO4     | 5.59   | 12.3   | 1.1377381 | 9.73E-06    |
| 610 | 1645   | AKR1C1    | 4.2    | 9.24   | 1.1375035 | 3.82E-29    |
| 611 | 7439   | BEST1     | 0.5    | 1.1    | 1.1375035 | 4.83E-04    |
| 612 | 8744   | TNFSF9    | 10.1   | 22.21  | 1.1368541 | 1.24E-21    |
| 613 | 255783 | INAFM1    | 13.48  | 29.64  | 1.136725  | 2.74E-12    |
| 614 | 131540 | ZDHHC19   | 0.96   | 2.11   | 1.1361367 | 0.040758978 |
| 615 | 84727  | SPSB2     | 6.01   | 13.2   | 1.135101  | 1.69E-10    |
| 616 | 583    | BBS2      | 3.63   | 7.97   | 1.1346102 | 6.02E-15    |
| 617 | 29953  | TRHDE     | 0.36   | 0.79   | 1.1338557 | 8.15E-04    |
| 618 | 10826  | FAXDC2    | 13.09  | 28.71  | 1.1330882 | 3.07E-53    |
| 619 | 78990  | OTUB2     | 0.26   | 0.57   | 1.1324503 | 0.022744278 |
| 620 | 10360  | NPM3      | 25.82  | 56.59  | 1.1320581 | 7.09E-24    |
| 621 | 376497 | SLC27A1   | 1.34   | 2.93   | 1.1286677 | 2.07E-07    |
| 622 | 501    | ALDH7A1   | 0.97   | 2.12   | 1.1280076 | 2.07E-07    |
| 623 | 3014   | H2AX      | 137.14 | 299.69 | 1.1278215 | 4.21E-269   |
| 624 | 200942 | KLHDC8B   | 21.82  | 47.67  | 1.1274305 | 2.16E-56    |
| 625 | 653082 | ZDHHC11B  | 0.38   | 0.83   | 1.1271119 | 0.049572999 |
| 626 | 10536  | P3H3      | 9.24   | 20.18  | 1.1269614 | 3.47E-33    |
| 627 | 30812  | SOX8      | 0.33   | 0.72   | 1.1255309 | 0.03086071  |
| 628 | 3913   | LAMB2     | 8.2    | 17.89  | 1.1254576 | 9.50E-66    |
| 629 | 388272 | C16orf87  | 6.35   | 13.85  | 1.1250575 | 4.56E-05    |
| 630 | 140606 | SELENOM   | 18.74  | 40.83  | 1.1235086 | 2.94E-12    |
| 631 | 11076  | TPPP      | 1.07   | 2.33   | 1.1227192 | 6.18E-10    |
| 632 | 8612   | PLPP2     | 1.13   | 2.46   | 1.1223355 | 0.015066415 |
| 633 | 84717  | HDGFL2    | 34.5   | 75.09  | 1.1220244 | 3.34E-103   |
| 634 | 80223  | RAB11FIP1 | 5.14   | 11.18  | 1.1210799 | 3.31E-37    |
| 635 | 157638 | LRATD2    | 0.23   | 0.5    | 1.1202942 | 0.013188777 |
| 636 | 145853 | C15orf61  | 6.86   | 14.91  | 1.1199998 | 2.90E-40    |
| 637 | 2548   | GAA       | 0.99   | 2.15   | 1.1188362 | 1.17E-05    |
| 638 | 158056 | MAMDC4    | 0.41   | 0.89   | 1.1181814 | 0.006459459 |
| 639 | 27352  | SGSM3     | 13.96  | 30.3   | 1.1180189 | 2.78E-56    |
| 640 | 400709 | SIGLEC16  | 0.77   | 1.67   | 1.1169178 | 6.15E-05    |
| 641 | 3690   | ITGB3     | 32.38  | 70.21  | 1.1165735 | 1.31E-268   |
| 642 | 54557  | SGTB      | 2.44   | 5.28   | 1.1136568 | 3.15E-19    |
| 643 | 421    | ARVCF     | 3.58   | 7.74   | 1.112374  | 1.26E-17    |
| 644 | 1028   | CDKN1C    | 1.05   | 2.27   | 1.112303  | 0.00318419  |
| 645 | 84519  | ACRBP     | 4.72   | 10.2   | 1.1117104 | 5.89E-12    |
| 646 | 8820   | HESX1     | 0.5    | 1.08   | 1.1110313 | 0.036002072 |
| 647 | 84310  | C7orf50   | 33.92  | 73.22  | 1.1101016 | 1.09E-53    |
| 648 | 93233  | CCDC114   | 0.45   | 0.97   | 1.1080597 | 0.0059555   |
| 649 | 642475 | MROH6     | 5.73   | 12.35  | 1.107904  | 8.30E-20    |
| 650 | 23242  | COBL      | 0.39   | 0.84   | 1.1069152 | 1.79E-04    |
| 651 | 57568  | SIPA1L2   | 0.13   | 0.28   | 1.1069152 | 0.047804099 |
| 652 | 2053   | EPHX2     | 8.73   | 18.8   | 1.1066791 | 8.10E-24    |
| 653 | 92017  | SNX29     | 0.85   | 1.83   | 1.1063089 | 0.032211507 |
| 654 | 10841  | FTCD      | 0.33   | 0.71   | 1.105353  | 0.047815759 |
| 655 | 55529  | PIP4P2    | 20.68  | 44.48  | 1.1049206 | 2.91E-18    |
| 656 | 5916   | RARG      | 7.23   | 15.55  | 1.104847  | 1.99E-27    |
| 657 | 54540  | FAM193B   | 23.54  | 50.58  | 1.1034527 | 8.29E-98    |
| 658 | 414060 | TBC1D3C   | 1.55   | 3.33   | 1.103254  | 1.07E-06    |
| 659 | 4013   | VWA5A     | 12.61  | 27.05  | 1.1010603 | 3.35E-33    |
| 660 | 152189 | CMTM8     | 28.28  | 60.65  | 1.1007255 | 6.42E-35    |
| 661 | 2273   | FHL1      | 0.49   | 1.05   | 1.0995357 | 0.019854817 |
| 662 | 79777  | ACBD4     | 5.74   | 12.3   | 1.0995357 | 6.55E-12    |
| 663 | 254552 | NUDT8     | 8.53   | 18.26  | 1.0980691 | 2.05E-06    |
| 664 | 57030  | SLC17A7   | 1.43   | 3.06   | 1.0975165 | 2.62E-06    |
| 665 | 5660   | PSAP      | 63.43  | 135.73 | 1.0975024 | 3.71E-220   |
| 666 | 64927  | TTC23     | 3.15   | 6.73   | 1.0952547 | 6.21E-15    |
| 667 | 26575  | RGS17     | 3.42   | 7.3    | 1.0939001 | 0.002941758 |
| 668 | 3155   | HMGCL     | 9.15   | 19.53  | 1.0938483 | 3.54E-14    |

|     |           |              |        |        |           |             |
|-----|-----------|--------------|--------|--------|-----------|-------------|
| 669 | 29942     | PURG         | 1.64   | 3.5    | 1.0936591 | 3.49E-05    |
| 670 | 54058     | C21orf58     | 35.95  | 76.72  | 1.093611  | 3.66E-81    |
| 671 | 338707    | B4GALNT4     | 1.37   | 2.92   | 1.0917925 | 1.98E-07    |
| 672 | 26013     | L3MBTL1      | 3.16   | 6.73   | 1.0906819 | 5.18E-14    |
| 673 | 57664     | PLEKHA4      | 4.07   | 8.66   | 1.0893382 | 5.55E-16    |
| 674 | 83937     | RASSF4       | 0.94   | 2      | 1.0892673 | 2.64E-05    |
| 675 | 7227      | TRPS1        | 0.08   | 0.17   | 1.0874628 | 0.046844733 |
| 676 | 10603     | SH2B2        | 0.64   | 1.36   | 1.0874628 | 0.009726817 |
| 677 | 6654      | SOS1         | 23.9   | 50.75  | 1.0863972 | 9.83E-208   |
| 678 | 54492     | NEURL1B      | 1.8    | 3.82   | 1.0855757 | 6.62E-17    |
| 679 | 84266     | ALKBH7       | 40.9   | 86.76  | 1.0849292 | 1.22E-41    |
| 680 | 79746     | ECHDC3       | 0.99   | 2.1    | 1.0848889 | 0.013360186 |
| 681 | 11119     | BTN3A1       | 7.53   | 15.97  | 1.0846425 | 5.31E-33    |
| 682 | 116832    | RPL39L       | 2.49   | 5.28   | 1.0843922 | 0.020289411 |
| 683 | 90353     | CTU1         | 4.67   | 9.9    | 1.084006  | 1.23E-12    |
| 684 | 7423      | VEGFB        | 36.08  | 76.43  | 1.0829397 | 2.14E-74    |
| 685 | 55502     | HES6         | 14.14  | 29.92  | 1.0813281 | 1.86E-21    |
| 686 | 3758      | KCNJ1        | 0.52   | 1.1    | 1.08092   | 0.023335893 |
| 687 | 1647      | GADD45A      | 129.42 | 273.5  | 1.0794803 | 1.51E-186   |
| 688 | 23022     | PALLD        | 4.5    | 9.5    | 1.0780025 | 2.44E-30    |
| 689 | 230       | ALDOC        | 54.62  | 115.29 | 1.0777662 | 1.90E-99    |
| 690 | 333       | APLP1        | 2.8    | 5.91   | 1.0777313 | 7.71E-10    |
| 691 | 57558     | USP35        | 3.15   | 6.64   | 1.0758314 | 7.03E-16    |
| 692 | 129642    | MBOAT2       | 25.86  | 54.46  | 1.0744747 | 6.00E-56    |
| 693 | 684       | BST2         | 20.42  | 43     | 1.0743538 | 2.66E-20    |
| 694 | 125488    | TTC39C       | 6.57   | 13.83  | 1.0738359 | 0.005259455 |
| 695 | 80139     | ZNF703       | 0.68   | 1.43   | 1.0724085 | 0.001220767 |
| 696 | 6446      | SGK1         | 0.99   | 2.08   | 1.0710831 | 0.001220565 |
| 697 | 9322      | TRIP10       | 34.43  | 72.32  | 1.0707285 | 3.19E-82    |
| 698 | 10332     | CLEC4M       | 0.6    | 1.26   | 1.0703893 | 0.041517569 |
| 699 | 5127      | CDK16        | 31.19  | 65.48  | 1.0699708 | 2.57E-115   |
| 700 | 91523     | PCED1B       | 3.8    | 7.97   | 1.0685803 | 2.40E-11    |
| 701 | 54795     | TRPM4        | 5.19   | 10.86  | 1.0652177 | 3.22E-24    |
| 702 | 90326     | THAP3        | 14.91  | 31.19  | 1.0648033 | 4.52E-20    |
| 703 | 2323      | FLT3LG       | 14.58  | 30.49  | 1.0643454 | 4.13E-13    |
| 704 | 3911      | LAMA5        | 8.02   | 16.77  | 1.0642085 | 9.77E-116   |
| 705 | 1292      | COL6A2       | 2.84   | 5.93   | 1.0621412 | 3.97E-12    |
| 706 | 10954     | PDIA5        | 10.88  | 22.69  | 1.0603781 | 9.76E-23    |
| 707 | 8969      | H2AC11       | 5.12   | 10.66  | 1.0579917 | 0.027094725 |
| 708 | 84693     | MCEE         | 10.16  | 21.15  | 1.0577573 | 3.78E-08    |
| 709 | 5698      | PSMB9        | 94.7   | 197.08 | 1.057345  | 1.51E-89    |
| 710 | 871       | SERPINH1     | 48.75  | 101.41 | 1.0567258 | 2.85E-111   |
| 711 | 29957     | SLC25A24     | 4      | 8.32   | 1.0565835 | 3.50E-21    |
| 712 | 79161     | TMEM243      | 2.21   | 4.59   | 1.0544478 | 3.55E-04    |
| 713 | 57156     | TMEM63C      | 0.26   | 0.54   | 1.0544478 | 0.013362041 |
| 714 | 342918    | C19orf81     | 12.89  | 26.75  | 1.0532866 | 1.01E-08    |
| 715 | 84667     | HES7         | 5.09   | 10.56  | 1.0528723 | 5.72E-12    |
| 716 | 84278     | MFSD14C      | 10.46  | 21.7   | 1.0528122 | 0.003808575 |
| 717 | 64748     | PLPPR2       | 1.48   | 3.07   | 1.0526415 | 1.44E-05    |
| 718 | 7133      | TNFRSF1B     | 1.08   | 2.24   | 1.0524674 | 1.94E-05    |
| 719 | 387787    | LIPT2        | 0.95   | 1.97   | 1.0521962 | 0.00215065  |
| 720 | 8544      | PIR          | 6.54   | 13.55  | 1.0509303 | 4.52E-09    |
| 721 | 55336     | FBXL8        | 0.99   | 2.05   | 1.0501235 | 0.013358331 |
| 722 | 100302736 | TMED7-TICAM2 | 1.28   | 2.65   | 1.0498485 | 1.05E-06    |
| 723 | 348       | APOE         | 70.25  | 145.43 | 1.0497548 | 2.09E-79    |
| 724 | 6455      | SH3GL1       | 27.19  | 56.26  | 1.0490334 | 2.26E-82    |
| 725 | 10221     | TRIB1        | 24.72  | 51.14  | 1.0487734 | 9.48E-124   |
| 726 | 116931    | MED12L       | 6.72   | 13.9   | 1.0485517 | 2.30E-72    |
| 727 | 114793    | FMNL2        | 0.74   | 1.53   | 1.0479345 | 4.18E-06    |
| 728 | 9819      | TSC22D2      | 5.04   | 10.42  | 1.0478596 | 3.22E-13    |
| 729 | 91404     | SESTD1       | 8.09   | 16.72  | 1.0473632 | 3.44E-113   |

|     |           |              |        |        |           |             |
|-----|-----------|--------------|--------|--------|-----------|-------------|
| 730 | 9723      | SEMA3E       | 0.3    | 0.62   | 1.0473057 | 0.001633092 |
| 731 | 107986211 | LOC107986211 | 0.3    | 0.62   | 1.0473057 | 0.003764567 |
| 732 | 23768     | FLRT2        | 0.15   | 0.31   | 1.0473057 | 0.0233756   |
| 733 | 55367     | PIDD1        | 8.76   | 18.1   | 1.0469869 | 1.22E-25    |
| 734 | 79788     | ZNF665       | 0.31   | 0.64   | 1.0458037 | 0.026982191 |
| 735 | 29841     | GRHL1        | 1.57   | 3.24   | 1.0452293 | 1.77E-07    |
| 736 | 282679    | AQP11        | 0.95   | 1.96   | 1.0448542 | 0.005738568 |
| 737 | 130888    | FBXO36       | 0.82   | 1.69   | 1.0433274 | 0.001065249 |
| 738 | 9253      | NUMBL        | 5.61   | 11.56  | 1.0430687 | 1.16E-23    |
| 739 | 50488     | MINK1        | 16.02  | 33.01  | 1.043029  | 4.26E-95    |
| 740 | 8110      | DPF3         | 12.63  | 26     | 1.041657  | 1.19E-04    |
| 741 | 8312      | AXIN1        | 24.87  | 51.13  | 1.0397635 | 1.24E-80    |
| 742 | 9518      | GDF15        | 61.36  | 126.14 | 1.0396555 | 1.69E-70    |
| 743 | 102723713 | LOC102723713 | 0.36   | 0.74   | 1.0395284 | 0.035853188 |
| 744 | 255738    | PCSK9        | 7.28   | 14.95  | 1.0381351 | 8.01E-31    |
| 745 | 26502     | NARF         | 35.09  | 72.05  | 1.0379385 | 8.35E-62    |
| 746 | 9649      | RALGPS1      | 0.57   | 1.17   | 1.0374747 | 0.001640242 |
| 747 | 388341    | LRRRC75A     | 49.04  | 100.65 | 1.0373163 | 3.12E-178   |
| 748 | 3398      | ID2          | 87.57  | 179.6  | 1.0362787 | 2.99E-109   |
| 749 | 83463     | MXD3         | 20.73  | 42.51  | 1.0360821 | 4.53E-20    |
| 750 | 10802     | SEC24A       | 9.89   | 20.28  | 1.0360152 | 2.69E-40    |
| 751 | 63941     | NECAB3       | 14.84  | 30.42  | 1.0355291 | 4.45E-16    |
| 752 | 254531    | LPCAT4       | 13.58  | 27.83  | 1.0351574 | 2.15E-27    |
| 753 | 4281      | MID1         | 1.02   | 2.09   | 1.0349338 | 7.57E-06    |
| 754 | 6238      | RRBP1        | 30.89  | 63.17  | 1.0320997 | 1.78E-182   |
| 755 | 79767     | ELMO3        | 1.13   | 2.31   | 1.0315701 | 0.001880617 |
| 756 | 149233    | IL23R        | 1.86   | 3.8    | 1.0306968 | 8.26E-07    |
| 757 | 8329      | H2AC13       | 11.11  | 22.67  | 1.0289256 | 9.38E-04    |
| 758 | 115098    | CCDC124      | 114.08 | 232.75 | 1.0287353 | 4.62E-97    |
| 759 | 80303     | EFHD1        | 1.52   | 3.1    | 1.0281969 | 5.27E-04    |
| 760 | 168455    | CCDC71L      | 1.6    | 3.26   | 1.0268001 | 2.37E-13    |
| 761 | 51171     | HSD17B14     | 4.3    | 8.76   | 1.0265942 | 6.73E-05    |
| 762 | 8322      | FZD4         | 2.45   | 4.99   | 1.0262581 | 1.12E-21    |
| 763 | 645051    | GAGE13       | 12.8   | 26.02  | 1.0234772 | 5.87E-05    |
| 764 | 23414     | ZFPM2        | 3.41   | 6.93   | 1.0230836 | 5.63E-18    |
| 765 | 29998     | BICRA        | 3.63   | 7.37   | 1.0216951 | 2.26E-21    |
| 766 | 113675    | SDSL         | 5.61   | 11.37  | 1.0191596 | 9.25E-08    |
| 767 | 3110      | MNX1         | 2.8    | 5.67   | 1.0179219 | 3.56E-07    |
| 768 | 9351      | SLC9A3R2     | 10.18  | 20.6   | 1.0169068 | 2.82E-23    |
| 769 | 147906    | DACT3        | 4.76   | 9.63   | 1.0165742 | 1.85E-16    |
| 770 | 54845     | ESRP1        | 0.44   | 0.89   | 1.0163018 | 0.011616535 |
| 771 | 79174     | CRELD2       | 6.79   | 13.73  | 1.0158481 | 8.66E-08    |
| 772 | 9828      | ARHGEF17     | 1.88   | 3.8    | 1.0152668 | 4.10E-18    |
| 773 | 2812      | GP1BB        | 100.35 | 202.75 | 1.0146613 | 2.54E-79    |
| 774 | 10398     | MYL9         | 5.18   | 10.46  | 1.0138588 | 6.69E-16    |
| 775 | 25805     | BAMBI        | 19.66  | 39.69  | 1.0135122 | 7.08E-33    |
| 776 | 5033      | P4HA1        | 9.87   | 19.88  | 1.0101958 | 5.16E-30    |
| 777 | 107987373 | LOC107987373 | 6.44   | 12.97  | 1.0100459 | 2.69E-04    |
| 778 | 9950      | GOLGA5       | 9.94   | 20.01  | 1.0094034 | 1.73E-30    |
| 779 | 200312    | RNF215       | 3.09   | 6.21   | 1.0069864 | 4.79E-07    |
| 780 | 7692      | ZNF133       | 2.4    | 4.82   | 1.0059987 | 0.022468929 |
| 781 | 7469      | NELFA        | 40.12  | 80.57  | 1.0059212 | 2.45E-88    |
| 782 | 7461      | CLIP2        | 7.45   | 14.96  | 1.0057978 | 2.81E-45    |
| 783 | 83719     | YPEL3        | 34.75  | 69.7   | 1.0041457 | 1.64E-31    |
| 784 | 3720      | JARID2       | 15     | 30.08  | 1.0038421 | 1.37E-66    |
| 785 | 440295    | GOLGA6L9     | 3.83   | 7.68   | 1.0037619 | 1.76E-19    |
| 786 | 64077     | LHPP         | 16.53  | 33.13  | 1.0030515 | 7.10E-24    |
| 787 | 122509    | IFI27L1      | 10.48  | 21     | 1.0027506 | 7.59E-09    |
| 788 | 9479      | MAPK8IP1     | 2.73   | 5.47   | 1.0026399 | 1.74E-09    |
| 789 | 9853      | RUSC2        | 6.46   | 12.94  | 1.0022315 | 2.07E-26    |
| 790 | 79629     | OCEL1        | 13.82  | 27.67  | 1.001565  | 1.80E-12    |

|     |           |              |         |        |           |             |
|-----|-----------|--------------|---------|--------|-----------|-------------|
| 791 | 644815    | FAM83G       | 0.31    | 0.62   | 1         | 0.011614903 |
| 792 | 5727      | PTCH1        | 0.16    | 0.32   | 1         | 0.026971697 |
| 793 | 3293      | HSD17B3      | 1.69    | 3.38   | 1         | 0.016386451 |
| 794 | 138428    | PTRH1        | 2.59    | 5.18   | 1         | 0.005765284 |
| 795 | 100533496 | TVP23C-CDRT4 | 0.67    | 1.34   | 1         | 0.007600948 |
| 796 | 115207    | KCTD12       | 0.24    | 0.48   | 1         | 0.015343367 |
| 797 | 4291      | MLF1         | 4.05    | 8.1    | 1         | 5.31E-10    |
| 798 | 399473    | SPRED3       | 0.37    | 0.74   | 1         | 0.008728767 |
| 799 | 10156     | RASA4        | 4.01    | 8.02   | 1         | 4.24E-11    |
| 800 | 400745    | SH2D5        | 0.96    | 1.92   | 1         | 7.68E-05    |
| 801 | 8671      | SLC4A4       | 0.42    | 0.21   | -1        | 0.006483476 |
| 802 | 10184     | LHFPL2       | 4.46    | 2.23   | -1        | 9.52E-13    |
| 803 | 5125      | PCSK5        | 0.3     | 0.15   | -1        | 0.010881319 |
| 804 | 93953     | GCNA         | 0.88    | 0.44   | -1        | 0.022397437 |
| 805 | 4922      | NTS          | 91.55   | 45.77  | -1.000158 | 1.42E-51    |
| 806 | 101928589 | LOC101928589 | 6.09    | 3.04   | -1.002371 | 1.07E-06    |
| 807 | 10099     | TSPAN3       | 84.81   | 42.29  | -1.003918 | 4.33E-77    |
| 808 | 11154     | AP4S1        | 5.62    | 2.8    | -1.005143 | 2.13E-11    |
| 809 | 112694756 | LOC112694756 | 47.89   | 23.81  | -1.008157 | 4.36E-59    |
| 810 | 1571      | CYP2E1       | 5.07    | 2.52   | -1.008562 | 4.45E-05    |
| 811 | 51154     | MRTO4        | 41.12   | 20.43  | -1.009151 | 5.20E-43    |
| 812 | 2114      | ETS2         | 102.18  | 50.7   | -1.011055 | 4.71E-195   |
| 813 | 9816      | URB2         | 3.81    | 1.89   | -1.011405 | 1.42E-12    |
| 814 | 55703     | POLR3B       | 4.92    | 2.44   | -1.011777 | 2.87E-12    |
| 815 | 7071      | KLF10        | 25.21   | 12.48  | -1.014378 | 2.02E-40    |
| 816 | 79905     | TMC7         | 0.79    | 0.39   | -1.018379 | 0.030648686 |
| 817 | 55207     | ARL8B        | 36.96   | 18.24  | -1.018859 | 1.82E-58    |
| 818 | 150290    | DUSP18       | 0.73    | 0.36   | -1.0199   | 0.00361812  |
| 819 | 9057      | SLC7A6       | 13.75   | 6.78   | -1.020074 | 1.10E-48    |
| 820 | 129401    | NUP35        | 22.29   | 10.97  | -1.022833 | 7.89E-18    |
| 821 | 3093      | UBE2K        | 43.26   | 21.28  | -1.023536 | 7.41E-126   |
| 822 | 80746     | TSEN2        | 7.91    | 3.89   | -1.023908 | 2.14E-09    |
| 823 | 6569      | SLC34A1      | 9.87    | 4.85   | -1.025065 | 8.81E-12    |
| 824 | 56144     | PCDHA4       | 0.53    | 0.26   | -1.027481 | 3.05E-04    |
| 825 | 1521      | CTSW         | 146.41  | 71.82  | -1.027557 | 1.59E-88    |
| 826 | 1269      | CNR2         | 0.98    | 0.48   | -1.029747 | 1.75E-04    |
| 827 | 199       | AIF1         | 1117.17 | 547.11 | -1.029946 | 1.01E-168   |
| 828 | 92745     | SLC38A5      | 36.37   | 17.79  | -1.031682 | 4.63E-36    |
| 829 | 51527     | GSKIP        | 6.09    | 2.97   | -1.035979 | 9.70E-08    |
| 830 | 814       | CAMK4        | 1.11    | 0.54   | -1.039528 | 5.76E-09    |
| 831 | 6916      | TBXAS1       | 41.97   | 20.38  | -1.042204 | 6.31E-35    |
| 832 | 114885    | OSBPL11      | 1.98    | 0.96   | -1.044394 | 3.24E-06    |
| 833 | 339829    | CCDC39       | 0.66    | 0.32   | -1.044394 | 0.022394481 |
| 834 | 55008     | HERC6        | 3.57    | 1.73   | -1.045152 | 1.43E-08    |
| 835 | 9508      | ADAMTS3      | 7.94    | 3.84   | -1.048033 | 4.84E-29    |
| 836 | 100506127 | GVQW3        | 3.27    | 1.58   | -1.049366 | 5.50E-18    |
| 837 | 6700      | SPRR2A       | 8.37    | 4.04   | -1.050872 | 0.003839181 |
| 838 | 23219     | FBXO28       | 5.37    | 2.59   | -1.05197  | 9.54E-18    |
| 839 | 474344    | GIMAP6       | 7.59    | 3.66   | -1.052256 | 5.65E-16    |
| 840 | 340156    | MYLK4        | 1.91    | 0.92   | -1.053867 | 3.96E-07    |
| 841 | 79072     | FASTKD3      | 9.52    | 4.58   | -1.055614 | 1.53E-13    |
| 842 | 753       | LDLRAD4      | 10.5    | 5.05   | -1.056034 | 5.04E-55    |
| 843 | 83886     | PRSS27       | 3.39    | 1.63   | -1.056413 | 0.014790577 |
| 844 | 375341    | C3orf62      | 3.4     | 1.63   | -1.060663 | 2.59E-08    |
| 845 | 58496     | LY6G5B       | 21.37   | 10.24  | -1.061371 | 8.55E-08    |
| 846 | 123103    | KLHL33       | 1.44    | 0.69   | -1.061401 | 4.46E-05    |
| 847 | 147007    | TMEM199      | 8.33    | 3.99   | -1.061928 | 1.38E-15    |
| 848 | 140862    | ISM1         | 6       | 2.87   | -1.063912 | 1.59E-10    |
| 849 | 23007     | PLCH1        | 23.06   | 11.03  | -1.06396  | 1.20E-89    |
| 850 | 51703     | ACSL5        | 12.18   | 5.82   | -1.065423 | 4.04E-24    |
| 851 | 3691      | ITGB4        | 6.51    | 3.11   | -1.065743 | 5.28E-23    |

|     |           |              |        |        |           |             |
|-----|-----------|--------------|--------|--------|-----------|-------------|
| 852 | 1524      | CX3CR1       | 6.44   | 3.07   | -1.068822 | 1.67E-12    |
| 853 | 285313    | IGSF10       | 9.87   | 4.7    | -1.070389 | 2.20E-49    |
| 854 | 113419    | TEX261       | 28.02  | 13.31  | -1.073946 | 3.10E-56    |
| 855 | 51225     | ABI3         | 3.2    | 1.52   | -1.074001 | 0.001026549 |
| 856 | 64785     | GIN53        | 11.77  | 5.59   | -1.074194 | 2.09E-14    |
| 857 | 22809     | ATF5         | 12.74  | 6.04   | -1.076745 | 5.24E-15    |
| 858 | 6876      | TAGLN        | 1.29   | 0.61   | -1.08049  | 3.70E-04    |
| 859 | 7481      | WNT11        | 7.41   | 3.5    | -1.082119 | 9.11E-10    |
| 860 | 10197     | PSME3        | 73.55  | 34.74  | -1.082128 | 2.07E-139   |
| 861 | 283377    | SPRYD4       | 1.44   | 0.68   | -1.082462 | 4.68E-11    |
| 862 | 10446     | LRRN2        | 6.72   | 3.17   | -1.083978 | 1.01E-14    |
| 863 | 285440    | CYP4V2       | 6.11   | 2.88   | -1.085104 | 5.88E-18    |
| 864 | 8224      | SYN3         | 1.55   | 0.73   | -1.0863   | 1.66E-08    |
| 865 | 54534     | MRPL50       | 10.05  | 4.73   | -1.087283 | 6.11E-21    |
| 866 | 25791     | NGEF         | 2.04   | 0.96   | -1.087463 | 0.001723101 |
| 867 | 7473      | WNT3         | 1.87   | 0.88   | -1.087463 | 1.20E-04    |
| 868 | 92340     | PRR29        | 6.7    | 3.15   | -1.088809 | 1.21E-04    |
| 869 | 7128      | TNFAIP3      | 21.02  | 9.87   | -1.090641 | 2.26E-65    |
| 870 | 112441434 | SHLD3        | 3.28   | 1.54   | -1.090765 | 0.001125608 |
| 871 | 55851     | PSENE1       | 28.65  | 13.44  | -1.092002 | 6.21E-17    |
| 872 | 10799     | RPP40        | 12.61  | 5.91   | -1.093338 | 1.19E-06    |
| 873 | 10962     | MLLT11       | 18.39  | 8.61   | -1.094836 | 1.17E-27    |
| 874 | 30819     | KCNIP2       | 6.29   | 2.94   | -1.097244 | 7.79E-09    |
| 875 | 10849     | POLR1G       | 4.11   | 1.92   | -1.098032 | 8.35E-08    |
| 876 | 6996      | TDG          | 28.77  | 13.44  | -1.098032 | 5.73E-56    |
| 877 | 93589     | CACNA2D4     | 6.98   | 3.26   | -1.098355 | 7.57E-26    |
| 878 | 10220     | GDF11        | 36.71  | 17.14  | -1.098806 | 0           |
| 879 | 6752      | SSTR2        | 0.3    | 0.14   | -1.099536 | 0.027590197 |
| 880 | 5409      | PNMT         | 27.52  | 12.81  | -1.10321  | 2.18E-14    |
| 881 | 11251     | PTGDR2       | 8.84   | 4.11   | -1.104908 | 2.18E-16    |
| 882 | 26122     | EPC2         | 14.5   | 6.73   | -1.107374 | 1.14E-37    |
| 883 | 22858     | CILK1        | 2.85   | 1.32   | -1.110424 | 6.49E-12    |
| 884 | 9572      | NR1D1        | 6.37   | 2.95   | -1.110578 | 3.69E-11    |
| 885 | 259197    | NCR3         | 29.6   | 13.66  | -1.11564  | 2.13E-16    |
| 886 | 54978     | SLC35F6      | 9.2    | 4.24   | -1.11757  | 1.08E-23    |
| 887 | 114836    | SLAMF6       | 18.4   | 8.48   | -1.11757  | 2.89E-31    |
| 888 | 60496     | AASDHPPT     | 34.41  | 15.84  | -1.119256 | 7.67E-60    |
| 889 | 107986453 | LOC107986453 | 3.02   | 1.39   | -1.119464 | 9.53E-09    |
| 890 | 10219     | KLRG1        | 15.24  | 7.01   | -1.120377 | 2.30E-17    |
| 891 | 54982     | CLN6         | 62.65  | 28.8   | -1.121246 | 5.78E-85    |
| 892 | 79865     | TREML2       | 24.34  | 11.18  | -1.122409 | 2.73E-59    |
| 893 | 85458     | DIXDC1       | 3.18   | 1.46   | -1.123058 | 1.52E-11    |
| 894 | 158880    | USP51        | 1.09   | 0.5    | -1.124328 | 2.02E-04    |
| 895 | 23046     | KIF21B       | 13.77  | 6.31   | -1.125817 | 4.61E-88    |
| 896 | 79184     | BRCC3        | 7.16   | 3.28   | -1.126264 | 1.21E-21    |
| 897 | 284098    | PIGW         | 9.5    | 4.35   | -1.126912 | 1.09E-15    |
| 898 | 57102     | C12orf4      | 9.82   | 4.49   | -1.129008 | 8.69E-23    |
| 899 | 118980    | SFXN2        | 13.77  | 6.29   | -1.130397 | 5.47E-32    |
| 900 | 284067    | CFAP97D1     | 0.81   | 0.37   | -1.130397 | 0.007785872 |
| 901 | 54491     | OTULINL      | 7.27   | 3.32   | -1.130772 | 2.15E-19    |
| 902 | 197358    | NLRC3        | 9.11   | 4.16   | -1.130868 | 2.44E-39    |
| 903 | 54738     | FEV          | 246.4  | 112.5  | -1.131077 | 2.34E-196   |
| 904 | 6571      | SLC18A2      | 22.43  | 10.24  | -1.131214 | 3.35E-56    |
| 905 | 29015     | SLC43A3      | 169.91 | 77.44  | -1.13362  | 2.48E-278   |
| 906 | 102723553 | SMIM11B      | 9.7    | 4.42   | -1.133938 | 1.44E-04    |
| 907 | 54937     | SOHLH2       | 2.81   | 1.28   | -1.134426 | 1.25E-04    |
| 908 | 8815      | BANF1        | 383.29 | 174.57 | -1.134631 | 1.23E-130   |
| 909 | 83992     | CTTNBP2      | 14.81  | 6.74   | -1.135751 | 2.37E-69    |
| 910 | 10346     | TRIM22       | 4.29   | 1.95   | -1.137504 | 9.13E-09    |
| 911 | 1769      | DNAH8        | 0.11   | 0.05   | -1.137504 | 0.038777863 |
| 912 | 107984203 | LOC107984203 | 6.03   | 2.74   | -1.137982 | 1.66E-12    |

|     |           |               |        |        |           |             |
|-----|-----------|---------------|--------|--------|-----------|-------------|
| 913 | 79071     | ELOVL6        | 15.09  | 6.85   | -1.139417 | 1.18E-67    |
| 914 | 7453      | WARS1         | 115.25 | 52.29  | -1.14016  | 7.71E-190   |
| 915 | 340024    | SLC6A19       | 31.14  | 14.12  | -1.141029 | 2.72E-108   |
| 916 | 4883      | NPR3          | 3.51   | 1.59   | -1.142444 | 8.97E-12    |
| 917 | 125893    | ZNF816        | 2.43   | 1.1    | -1.143453 | 6.81E-05    |
| 918 | 2359      | FPR3          | 4.93   | 2.23   | -1.144544 | 3.18E-09    |
| 919 | 376267    | RAB15         | 13.06  | 5.9    | -1.146368 | 3.26E-30    |
| 920 | 134957    | STXBP5        | 38.44  | 17.33  | -1.149337 | 1.07E-260   |
| 921 | 4638      | MYLK          | 17.89  | 8.06   | -1.150302 | 1.22E-37    |
| 922 | 7699      | ZNF140        | 6.47   | 2.91   | -1.152747 | 1.25E-12    |
| 923 | 6275      | S100A4        | 898.33 | 404.02 | -1.152819 | 5.39E-166   |
| 924 | 79850     | TLCD3A        | 12.01  | 5.4    | -1.153205 | 8.58E-18    |
| 925 | 3683      | ITGAL         | 3.47   | 1.56   | -1.15339  | 7.77E-14    |
| 926 | 9436      | NCR2          | 2.67   | 1.2    | -1.153805 | 0.004221314 |
| 927 | 285381    | DPH3          | 8.5    | 3.82   | -1.15389  | 1.34E-23    |
| 928 | 3561      | IL2RG         | 124.65 | 55.96  | -1.155415 | 1.13E-109   |
| 929 | 338596    | ST8SIA6       | 127.78 | 57.36  | -1.155545 | 0           |
| 930 | 5935      | RBM3          | 53.2   | 23.86  | -1.156832 | 3.72E-85    |
| 931 | 4914      | NTRK1         | 19.51  | 8.75   | -1.156859 | 3.48E-34    |
| 932 | 28978     | TMEM14A       | 11.13  | 4.99   | -1.157342 | 1.00E-06    |
| 933 | 10349     | ABCA10        | 0.29   | 0.13   | -1.157541 | 0.041110623 |
| 934 | 84517     | ACTRT3        | 2.01   | 0.9    | -1.159199 | 0.005606434 |
| 935 | 109504726 | ERV3-1-ZNF117 | 1.68   | 0.75   | -1.163499 | 1.29E-10    |
| 936 | 3695      | ITGB7         | 4.01   | 1.79   | -1.163643 | 2.89E-08    |
| 937 | 56154     | TEX15         | 2.29   | 1.02   | -1.166778 | 1.46E-19    |
| 938 | 118461    | C10orf71      | 0.18   | 0.08   | -1.169925 | 0.02146945  |
| 939 | 55709     | KBTBD4        | 3.96   | 1.76   | -1.169925 | 3.44E-07    |
| 940 | 159       | ADSS2         | 28.92  | 12.82  | -1.173671 | 1.87E-49    |
| 941 | 123722    | FSD2          | 0.79   | 0.35   | -1.174498 | 1.25E-04    |
| 942 | 2047      | EPHB1         | 2.71   | 1.2    | -1.175258 | 9.64E-10    |
| 943 | 55520     | ELAC1         | 1.83   | 0.81   | -1.17585  | 0.001437197 |
| 944 | 5778      | PTPN7         | 99.21  | 43.91  | -1.175936 | 9.69E-213   |
| 945 | 22997     | IGSF9B        | 0.43   | 0.19   | -1.178337 | 4.34E-06    |
| 946 | 101060179 | LOC101060179  | 2.22   | 0.98   | -1.179706 | 3.02E-04    |
| 947 | 64231     | MS4A6A        | 3.83   | 1.69   | -1.180321 | 1.74E-04    |
| 948 | 64236     | PDLIM2        | 17.28  | 7.62   | -1.18124  | 3.48E-15    |
| 949 | 317671    | RFESD         | 8.3    | 3.65   | -1.185215 | 1.76E-15    |
| 950 | 7562      | ZNF708        | 4.3    | 1.89   | -1.18595  | 2.42E-09    |
| 951 | 83759     | RBM4B         | 11.22  | 4.92   | -1.189342 | 1.19E-14    |
| 952 | 6282      | S100A11       | 353.49 | 154.96 | -1.189774 | 1.24E-80    |
| 953 | 26027     | ACOT11        | 19.08  | 8.36   | -1.190486 | 4.02E-37    |
| 954 | 153770    | PLAC8L1       | 1.05   | 0.46   | -1.190684 | 0.014277553 |
| 955 | 56652     | TWINK         | 19.86  | 8.69   | -1.192438 | 5.25E-44    |
| 956 | 58489     | ABHD17C       | 1.51   | 0.66   | -1.194011 | 0.002654689 |
| 957 | 128178    | EDARADD       | 3.02   | 1.32   | -1.194011 | 2.01E-07    |
| 958 | 10320     | IKZF1         | 22.85  | 9.98   | -1.195082 | 2.08E-92    |
| 959 | 8530      | CST7          | 2.82   | 1.23   | -1.197037 | 0.02920032  |
| 960 | 8871      | SYNJ2         | 14.77  | 6.44   | -1.197537 | 3.38E-81    |
| 961 | 1861      | TOR1A         | 29.38  | 12.81  | -1.197564 | 2.17E-41    |
| 962 | 65260     | COA7          | 33.49  | 14.6   | -1.197762 | 1.54E-95    |
| 963 | 8323      | FZD6          | 8.56   | 3.73   | -1.198435 | 9.77E-24    |
| 964 | 100532731 | COMMD3-BMI1   | 7.07   | 3.08   | -1.19878  | 1.10E-17    |
| 965 | 85446     | ZFHX2         | 1.86   | 0.81   | -1.199309 | 8.38E-12    |
| 966 | 84288     | EFCAB2        | 6.04   | 2.63   | -1.199486 | 2.55E-11    |
| 967 | 200205    | IBA57         | 1.47   | 0.64   | -1.199672 | 1.23E-09    |
| 968 | 3791      | KDR           | 7.58   | 3.3    | -1.199732 | 5.16E-33    |
| 969 | 23308     | ICOSLG        | 3.31   | 1.44   | -1.200762 | 2.87E-12    |
| 970 | 202374    | STK32A        | 0.69   | 0.3    | -1.201634 | 0.001168707 |
| 971 | 10870     | HCST          | 245.49 | 106.7  | -1.202104 | 2.02E-50    |
| 972 | 23604     | DAPK2         | 1.91   | 0.83   | -1.202389 | 0.001095915 |
| 973 | 100133941 | CD24          | 7.88   | 3.42   | -1.204199 | 3.44E-12    |



|      |           |              |        |        |           |             |
|------|-----------|--------------|--------|--------|-----------|-------------|
| 974  | 83593     | RASSF5       | 21.11  | 9.16   | -1.204507 | 4.40E-56    |
| 975  | 112495    | GTF3C6       | 88.23  | 38.26  | -1.205432 | 2.19E-36    |
| 976  | 57143     | ADCK1        | 1.87   | 0.81   | -1.207044 | 0.01468959  |
| 977  | 1846      | DUSP4        | 1.87   | 0.81   | -1.207044 | 1.19E-08    |
| 978  | 7957      | EPM2A        | 2.45   | 1.06   | -1.208717 | 4.90E-08    |
| 979  | 84216     | TMEM117      | 1.92   | 0.83   | -1.209923 | 3.19E-04    |
| 980  | 85481     | PSKH2        | 2.76   | 1.19   | -1.213707 | 6.89E-06    |
| 981  | 8091      | HMGA2        | 2.32   | 1      | -1.214125 | 7.33E-05    |
| 982  | 9770      | RASSF2       | 14.81  | 6.38   | -1.214943 | 1.18E-60    |
| 983  | 3269      | HRH1         | 0.35   | 0.15   | -1.222392 | 0.030925687 |
| 984  | 960       | CD44         | 55.06  | 23.57  | -1.224053 | 8.43E-184   |
| 985  | 340526    | RTL5         | 1.22   | 0.52   | -1.230298 | 8.35E-05    |
| 986  | 6745      | SSR1         | 20.06  | 8.53   | -1.233704 | 4.52E-151   |
| 987  | 23251     | MINAR1       | 2.99   | 1.27   | -1.235317 | 8.47E-18    |
| 988  | 149840    | SHLD1        | 6.6    | 2.8    | -1.237039 | 1.50E-04    |
| 989  | 7627      | ZNF75A       | 17.52  | 7.42   | -1.239512 | 2.46E-30    |
| 990  | 3579      | CXCR2        | 3.77   | 1.59   | -1.245538 | 7.54E-08    |
| 991  | 57545     | CC2D2A       | 3.32   | 1.4    | -1.245756 | 2.25E-05    |
| 992  | 57002     | YAE1         | 8.98   | 3.77   | -1.252151 | 5.23E-05    |
| 993  | 2014      | EMP3         | 436.82 | 183.27 | -1.253068 | 7.93E-140   |
| 994  | 107984745 | LOC107984745 | 3.2    | 1.34   | -1.255839 | 4.43E-09    |
| 995  | 7544      | ZFY          | 2.46   | 1.03   | -1.256014 | 2.06E-10    |
| 996  | 389421    | LIN28B       | 22.44  | 9.39   | -1.256876 | 3.16E-96    |
| 997  | 27340     | UTP20        | 5.07   | 2.12   | -1.257921 | 2.78E-37    |
| 998  | 79626     | TNFAIP8L2    | 20.36  | 8.5    | -1.260203 | 6.63E-16    |
| 999  | 2124      | EVI2B        | 1.01   | 0.42   | -1.265894 | 0.025216001 |
| 1000 | 5877      | RABIF        | 4.69   | 1.95   | -1.266114 | 4.92E-12    |
| 1001 | 9289      | ADGRG1       | 53.37  | 22.16  | -1.268071 | 9.11E-169   |
| 1002 | 6871      | TADA2A       | 14.21  | 5.9    | -1.26812  | 5.95E-26    |
| 1003 | 23650     | TRIM29       | 0.94   | 0.39   | -1.269187 | 0.033350784 |
| 1004 | 11182     | SLC2A6       | 10.45  | 4.33   | -1.271064 | 1.92E-22    |
| 1005 | 1183      | CLCN4        | 14.69  | 6.08   | -1.272691 | 1.19E-80    |
| 1006 | 23498     | HAAO         | 0.63   | 0.26   | -1.27684  | 0.006704195 |
| 1007 | 27181     | SIGLEC8      | 1.85   | 0.76   | -1.283454 | 4.34E-05    |
| 1008 | 163131    | ZNF780B      | 4.36   | 1.79   | -1.284369 | 1.13E-25    |
| 1009 | 10093     | ARPC4        | 60.76  | 24.91  | -1.286397 | 2.40E-63    |
| 1010 | 6404      | SELPLG       | 66.82  | 27.27  | -1.292965 | 4.62E-133   |
| 1011 | 150       | ADRA2A       | 7.33   | 2.99   | -1.293668 | 1.36E-23    |
| 1012 | 55612     | FERMT1       | 2.8    | 1.14   | -1.296393 | 1.26E-12    |
| 1013 | 10795     | ZNF268       | 1.5    | 0.61   | -1.298081 | 5.56E-18    |
| 1014 | 121340    | SP7          | 0.69   | 0.28   | -1.30117  | 0.016700232 |
| 1015 | 2811      | GP1BA        | 103.25 | 41.89  | -1.301464 | 3.42E-202   |
| 1016 | 105374103 | LOC105374103 | 8.21   | 3.33   | -1.30186  | 3.25E-34    |
| 1017 | 5791      | PTPRE        | 1.16   | 0.47   | -1.303392 | 3.40E-04    |
| 1018 | 196264    | MPZL3        | 1.36   | 0.55   | -1.306103 | 4.16E-05    |
| 1019 | 23209     | MLC1         | 24.22  | 9.79   | -1.306818 | 2.63E-71    |
| 1020 | 7582      | ZNF33B       | 5.5    | 2.22   | -1.308872 | 3.25E-29    |
| 1021 | 8778      | SIGLEC5      | 3.06   | 1.23   | -1.314873 | 2.74E-07    |
| 1022 | 401089    | FOXL2NB      | 1.52   | 0.61   | -1.31719  | 0.013921774 |
| 1023 | 492307    | PPDPFL       | 16.13  | 6.47   | -1.317909 | 6.77E-16    |
| 1024 | 79818     | ZNF552       | 0.7    | 0.28   | -1.321928 | 0.009522571 |
| 1025 | 284306    | ZNF547       | 0.95   | 0.38   | -1.321928 | 0.00542305  |
| 1026 | 3742      | KCNA6        | 0.1    | 0.04   | -1.321928 | 0.044096696 |
| 1027 | 102723750 | LOC102723750 | 0.65   | 0.26   | -1.321928 | 7.88E-04    |
| 1028 | 1427      | CRYGS        | 2.23   | 0.89   | -1.325166 | 0.046658319 |
| 1029 | 283571    | PROX2        | 0.78   | 0.31   | -1.331206 | 4.54E-04    |
| 1030 | 8620      | NPFF         | 3.68   | 1.46   | -1.333737 | 0.037983733 |
| 1031 | 64218     | SEMA4A       | 3.53   | 1.4    | -1.334241 | 5.39E-10    |
| 1032 | 1414      | CRYBB1       | 5.41   | 2.14   | -1.338018 | 9.80E-05    |
| 1033 | 51729     | WBP11        | 59.58  | 23.56  | -1.338489 | 1.09E-233   |
| 1034 | 1359      | CPA3         | 34.35  | 13.56  | -1.340953 | 1.83E-47    |

|      |           |              |        |       |           |             |
|------|-----------|--------------|--------|-------|-----------|-------------|
| 1035 | 83483     | PLVAP        | 18.22  | 7.19  | -1.341459 | 2.69E-34    |
| 1036 | 192683    | SCAMP5       | 12.54  | 4.94  | -1.343954 | 7.54E-29    |
| 1037 | 79081     | LBHD1        | 8.16   | 3.21  | -1.345996 | 8.28E-13    |
| 1038 | 107987254 | LOC107987254 | 2.39   | 0.94  | -1.346278 | 1.03E-05    |
| 1039 | 11102     | RPP14        | 2.27   | 0.89  | -1.350815 | 2.35E-09    |
| 1040 | 51807     | TUBA8        | 2.17   | 0.85  | -1.35216  | 2.55E-04    |
| 1041 | 4144      | MAT2A        | 246.36 | 96.32 | -1.354861 | 0           |
| 1042 | 84502     | JPH4         | 2.18   | 0.85  | -1.358793 | 6.23E-09    |
| 1043 | 7099      | TLR4         | 1.77   | 0.69  | -1.359081 | 2.25E-21    |
| 1044 | 113455421 | DERPC        | 31.8   | 12.39 | -1.359851 | 3.44E-77    |
| 1045 | 9941      | EXOG         | 5.48   | 2.12  | -1.370112 | 1.03E-16    |
| 1046 | 53833     | IL20RB       | 0.83   | 0.32  | -1.375039 | 0.031813313 |
| 1047 | 54809     | SAMD9        | 6.64   | 2.56  | -1.375039 | 9.34E-42    |
| 1048 | 110599588 | ASDURF       | 16.55  | 6.37  | -1.377466 | 7.16E-07    |
| 1049 | 255877    | BCL6B        | 15.6   | 6     | -1.378512 | 6.41E-49    |
| 1050 | 401258    | RAB44        | 17.74  | 6.78  | -1.387649 | 4.53E-69    |
| 1051 | 6285      | S100B        | 2.8    | 1.07  | -1.387816 | 0.00310097  |
| 1052 | 152007    | GLIPR2       | 10.56  | 4.03  | -1.389758 | 4.14E-17    |
| 1053 | 1534      | CYB561       | 9.24   | 3.52  | -1.392317 | 3.06E-25    |
| 1054 | 147657    | ZNF480       | 4.41   | 1.68  | -1.392317 | 4.57E-20    |
| 1055 | 219621    | CABCOCO1     | 2.39   | 0.91  | -1.393072 | 0.003101936 |
| 1056 | 92922     | CCDC102A     | 6.37   | 2.42  | -1.396286 | 2.48E-14    |
| 1057 | 389015    | SLC9A4       | 0.87   | 0.33  | -1.398549 | 4.54E-04    |
| 1058 | 10203     | CALCRL       | 0.58   | 0.22  | -1.398549 | 3.05E-04    |
| 1059 | 8905      | AP1S2        | 13.6   | 5.14  | -1.403766 | 6.19E-25    |
| 1060 | 100528030 | POC1B-GALNT4 | 1.38   | 0.52  | -1.408085 | 3.36E-07    |
| 1061 | 55915     | LANCL2       | 2.1    | 0.79  | -1.410465 | 2.03E-09    |
| 1062 | 2312      | FLG          | 0.16   | 0.06  | -1.415037 | 0.006705179 |
| 1063 | 619279    | ZNF704       | 0.08   | 0.03  | -1.415037 | 0.020346657 |
| 1064 | 23098     | SARM1        | 0.24   | 0.09  | -1.415037 | 0.003101453 |
| 1065 | 313       | AOAH         | 0.24   | 0.09  | -1.415037 | 0.034292818 |
| 1066 | 921       | CD5          | 0.59   | 0.22  | -1.423211 | 0.012001875 |
| 1067 | 9498      | SLC4A8       | 1.61   | 0.6   | -1.424026 | 3.03E-15    |
| 1068 | 2015      | ADGRE1       | 0.51   | 0.19  | -1.424498 | 0.031817369 |
| 1069 | 411       | ARSB         | 2.8    | 1.04  | -1.428843 | 4.81E-13    |
| 1070 | 25853     | DCAF12       | 40.53  | 15.05 | -1.429227 | 7.65E-136   |
| 1071 | 51206     | GP6          | 86.87  | 32.25 | -1.429559 | 1.98E-174   |
| 1072 | 80741     | LY6G5C       | 6.79   | 2.52  | -1.429988 | 4.52E-04    |
| 1073 | 6850      | SYK          | 45.98  | 17.06 | -1.430389 | 2.75E-231   |
| 1074 | 55184     | DZANK1       | 0.89   | 0.33  | -1.431339 | 5.24E-04    |
| 1075 | 5551      | PRF1         | 14.89  | 5.5   | -1.43684  | 1.15E-34    |
| 1076 | 8372      | HYAL3        | 67.67  | 24.99 | -1.437165 | 2.03E-107   |
| 1077 | 285852    | TREML4       | 1.95   | 0.72  | -1.437405 | 2.15E-05    |
| 1078 | 56243     | KIAA1217     | 0.76   | 0.28  | -1.440573 | 2.93E-06    |
| 1079 | 374383    | NCR3LG1      | 17.17  | 6.3   | -1.446466 | 9.00E-106   |
| 1080 | 81603     | TRIM8        | 130.12 | 47.73 | -1.446874 | 0           |
| 1081 | 64747     | MFSD1        | 16.55  | 6.06  | -1.449442 | 5.97E-34    |
| 1082 | 285349    | ZNF660       | 1.59   | 0.58  | -1.454902 | 4.28E-10    |
| 1083 | 117286    | CIB3         | 2.6    | 0.94  | -1.467779 | 0.015211328 |
| 1084 | 9437      | NCR1         | 6.01   | 2.17  | -1.46967  | 3.14E-07    |
| 1085 | 3955      | LFNG         | 3.38   | 1.22  | -1.470142 | 2.23E-08    |
| 1086 | 55313     | CPPED1       | 35.32  | 12.69 | -1.476793 | 4.16E-218   |
| 1087 | 79815     | NIPAL2       | 2.65   | 0.95  | -1.479993 | 1.36E-12    |
| 1088 | 84174     | SLA2         | 30.21  | 10.83 | -1.479993 | 2.79E-79    |
| 1089 | 22890     | ZBTB1        | 9.24   | 3.3   | -1.485427 | 2.11E-35    |
| 1090 | 147949    | ZNF583       | 1.99   | 0.71  | -1.486878 | 2.60E-08    |
| 1091 | 57559     | STAMBPL1     | 3.03   | 1.08  | -1.488286 | 8.12E-06    |
| 1092 | 132724    | TMPRSS11B    | 0.59   | 0.21  | -1.490326 | 0.021466601 |
| 1093 | 27094     | KCNMB3       | 3.77   | 1.34  | -1.492332 | 8.14E-06    |
| 1094 | 59283     | CACNG8       | 2.48   | 0.88  | -1.494765 | 1.52E-23    |
| 1095 | 5592      | PRKG1        | 0.31   | 0.11  | -1.494765 | 0.004357358 |

|      |           |              |        |       |           |             |
|------|-----------|--------------|--------|-------|-----------|-------------|
| 1096 | 1233      | CCR4         | 6.33   | 2.24  | -1.498707 | 1.77E-17    |
| 1097 | 1511      | CTSG         | 1.67   | 0.59  | -1.501061 | 0.047072784 |
| 1098 | 11314     | CD300A       | 38.07  | 13.42 | -1.50427  | 3.06E-48    |
| 1099 | 107987269 | LOC107987269 | 0.74   | 0.26  | -1.509014 | 0.047067032 |
| 1100 | 3581      | IL9R         | 22.12  | 7.76  | -1.511223 | 9.54E-74    |
| 1101 | 7177      | TPSAB1       | 16.64  | 5.83  | -1.513088 | 3.75E-17    |
| 1102 | 51555     | PEX5L        | 0.2    | 0.07  | -1.514573 | 0.006580353 |
| 1103 | 56983     | POGLUT1      | 9.39   | 3.28  | -1.517429 | 1.82E-32    |
| 1104 | 80774     | LIMD2        | 160.7  | 56.12 | -1.517783 | 2.63E-189   |
| 1105 | 5971      | RELB         | 16.62  | 5.8   | -1.518796 | 5.65E-37    |
| 1106 | 147040    | KCTD11       | 0.43   | 0.15  | -1.519374 | 0.031154975 |
| 1107 | 9836      | LCMT2        | 2.87   | 1     | -1.521051 | 1.33E-21    |
| 1108 | 57574     | MARCHF4      | 2.9    | 1.01  | -1.521698 | 1.13E-15    |
| 1109 | 164045    | HFM1         | 0.69   | 0.24  | -1.523562 | 0.002110537 |
| 1110 | 57514     | ARHGAP31     | 1.18   | 0.41  | -1.525091 | 5.88E-09    |
| 1111 | 197021    | LCTL         | 0.49   | 0.17  | -1.527247 | 0.025941348 |
| 1112 | 170575    | GIMAP1       | 0.49   | 0.17  | -1.527247 | 0.005490605 |
| 1113 | 29933     | GPR132       | 1.04   | 0.36  | -1.530515 | 8.34E-05    |
| 1114 | 286204    | CRB2         | 0.55   | 0.19  | -1.533432 | 3.75E-04    |
| 1115 | 8340      | H2BC13       | 10.3   | 3.54  | -1.540823 | 0.004356698 |
| 1116 | 441273    | SPDYE2       | 1.95   | 0.67  | -1.541241 | 9.23E-09    |
| 1117 | 8809      | IL18R1       | 3.35   | 1.15  | -1.542527 | 4.07E-15    |
| 1118 | 57191     | VN1R1        | 1.14   | 0.39  | -1.547488 | 0.014279517 |
| 1119 | 80008     | TMEM156      | 6.79   | 2.32  | -1.549287 | 8.50E-15    |
| 1120 | 80320     | SP6          | 0.82   | 0.28  | -1.550197 | 4.38E-04    |
| 1121 | 2207      | FCER1G       | 142.38 | 48.51 | -1.553392 | 4.23E-53    |
| 1122 | 124460    | SNX20        | 1.91   | 0.65  | -1.555061 | 1.38E-06    |
| 1123 | 653857    | ACTR3C       | 1.62   | 0.55  | -1.55849  | 0.013923696 |
| 1124 | 55256     | ADI1         | 39.92  | 13.55 | -1.558819 | 9.39E-85    |
| 1125 | 6948      | TCN2         | 0.59   | 0.2   | -1.560715 | 0.031147019 |
| 1126 | 57099     | AVEN         | 10.4   | 3.52  | -1.562936 | 8.34E-12    |
| 1127 | 107986113 | LOC107986113 | 0.65   | 0.22  | -1.562936 | 0.007194892 |
| 1128 | 597       | BCL2A1       | 4.06   | 1.37  | -1.567304 | 0.002425826 |
| 1129 | 84941     | HSH2D        | 1.58   | 0.53  | -1.57586  | 1.10E-05    |
| 1130 | 57699     | CPNE5        | 8.93   | 2.99  | -1.578515 | 1.84E-21    |
| 1131 | 8001      | GLRA3        | 0.15   | 0.05  | -1.584963 | 0.047078537 |
| 1132 | 9806      | SPOCK2       | 0.42   | 0.14  | -1.584963 | 0.008134097 |
| 1133 | 91768     | CABLES1      | 0.24   | 0.08  | -1.584963 | 0.031150996 |
| 1134 | 85477     | SCIN         | 0.12   | 0.04  | -1.584963 | 0.047084291 |
| 1135 | 1464      | CSPG4        | 0.75   | 0.25  | -1.584963 | 5.98E-08    |
| 1136 | 26154     | ABCA12       | 0.15   | 0.05  | -1.584963 | 0.017111681 |
| 1137 | 2709      | GJB5         | 8.3    | 2.74  | -1.598935 | 1.47E-11    |
| 1138 | 4057      | LTF          | 0.85   | 0.28  | -1.602036 | 0.002425441 |
| 1139 | 8743      | TNFSF10      | 0.85   | 0.28  | -1.602036 | 0.025944729 |
| 1140 | 149345    | SHISA4       | 1.5    | 0.49  | -1.614109 | 0.005206126 |
| 1141 | 220       | ALDH1A3      | 0.4    | 0.13  | -1.621488 | 0.020343946 |
| 1142 | 124637    | CYB5D1       | 3.09   | 1     | -1.627607 | 6.23E-13    |
| 1143 | 2342      | FNTB         | 13.01  | 4.2   | -1.63116  | 1.41E-39    |
| 1144 | 57103     | TIGAR        | 0.31   | 0.1   | -1.632268 | 3.71E-04    |
| 1145 | 146722    | CD300LF      | 6.95   | 2.21  | -1.652967 | 7.41E-14    |
| 1146 | 79628     | SH3TC2       | 0.38   | 0.12  | -1.662965 | 3.13E-13    |
| 1147 | 1270      | CNTF         | 1.11   | 0.35  | -1.665133 | 0.003389296 |
| 1148 | 165140    | OXER1        | 1.08   | 0.34  | -1.667425 | 0.00615382  |
| 1149 | 105376526 | LOC105376526 | 8.07   | 2.52  | -1.679145 | 3.93E-38    |
| 1150 | 344       | APOC2        | 99.85  | 31.16 | -1.680067 | 1.23E-50    |
| 1151 | 26960     | NBEA         | 5.26   | 1.64  | -1.681367 | 6.88E-24    |
| 1152 | 112267876 | LOC112267876 | 3.66   | 1.14  | -1.68281  | 0.009573566 |
| 1153 | 719       | C3AR1        | 5.96   | 1.85  | -1.687787 | 7.25E-25    |
| 1154 | 221468    | TMEM217      | 8.67   | 2.69  | -1.688426 | 1.21E-17    |
| 1155 | 2213      | FCGR2B       | 2.94   | 0.91  | -1.691878 | 1.32E-05    |
| 1156 | 151516    | ASPRV1       | 1.83   | 0.56  | -1.708345 | 1.96E-05    |

|      |           |              |       |       |           |             |
|------|-----------|--------------|-------|-------|-----------|-------------|
| 1157 | 79895     | ATP8B4       | 8.69  | 2.64  | -1.718818 | 3.33E-58    |
| 1158 | 2706      | GJB2         | 0.83  | 0.25  | -1.731183 | 0.003958375 |
| 1159 | 7730      | ZNF177       | 1.2   | 0.36  | -1.736966 | 1.53E-04    |
| 1160 | 57586     | SYT13        | 0.3   | 0.09  | -1.736966 | 0.00719594  |
| 1161 | 79858     | NEK11        | 0.64  | 0.19  | -1.752072 | 0.004604315 |
| 1162 | 57727     | NCOA5        | 12.45 | 3.69  | -1.754453 | 5.05E-51    |
| 1163 | 554       | AVPR2        | 0.54  | 0.16  | -1.754888 | 0.04410214  |
| 1164 | 114784    | CSMD2        | 2.57  | 0.76  | -1.757697 | 6.74E-49    |
| 1165 | 9379      | NRXN2        | 7.21  | 2.13  | -1.759146 | 1.64E-40    |
| 1166 | 341350    | OVCH1        | 0.17  | 0.05  | -1.765535 | 0.031143042 |
| 1167 | 202333    | CMYA5        | 0.17  | 0.05  | -1.765535 | 5.64E-04    |
| 1168 | 23430     | TPSD1        | 7.4   | 2.17  | -1.76983  | 3.43E-14    |
| 1169 | 83445     | GSG1         | 0.58  | 0.17  | -1.770518 | 0.009574931 |
| 1170 | 776       | CACNA1D      | 0.24  | 0.07  | -1.777608 | 0.002549429 |
| 1171 | 5031      | P2RY6        | 0.96  | 0.28  | -1.777608 | 0.014556706 |
| 1172 | 3680      | ITGA9        | 0.83  | 0.24  | -1.790077 | 1.25E-09    |
| 1173 | 23262     | PPIP5K2      | 31.52 | 9.08  | -1.795503 | 5.29E-235   |
| 1174 | 84951     | TNS4         | 1.36  | 0.39  | -1.802061 | 3.13E-09    |
| 1175 | 283420    | CLEC9A       | 0.6   | 0.17  | -1.819428 | 0.044091253 |
| 1176 | 10936     | GPR75        | 1.95  | 0.55  | -1.825971 | 5.94E-06    |
| 1177 | 7157      | TP53         | 40.83 | 11.41 | -1.839331 | 1.68E-133   |
| 1178 | 4613      | MYCN         | 26.9  | 7.41  | -1.860061 | 2.59E-71    |
| 1179 | 946       | SIGLEC6      | 56.09 | 15.45 | -1.860137 | 1.98E-240   |
| 1180 | 85414     | SLC45A3      | 43.08 | 11.84 | -1.863349 | 3.62E-198   |
| 1181 | 100506115 | PELATON      | 0.66  | 0.18  | -1.874469 | 0.015213406 |
| 1182 | 10628     | TXNIP        | 56.91 | 15.39 | -1.886689 | 6.10E-223   |
| 1183 | 1043      | CD52         | 45.82 | 12.37 | -1.889132 | 1.10E-14    |
| 1184 | 388813    | LOC388813    | 3.71  | 1     | -1.891419 | 1.16E-08    |
| 1185 | 55911     | APOBR        | 17.82 | 4.8   | -1.892391 | 8.47E-95    |
| 1186 | 51733     | UPB1         | 1.19  | 0.32  | -1.894818 | 0.002031728 |
| 1187 | 64499     | TPSB2        | 12.37 | 3.32  | -1.89759  | 1.08E-17    |
| 1188 | 5287      | PIK3C2B      | 0.82  | 0.22  | -1.89812  | 2.06E-09    |
| 1189 | 330       | BIRC3        | 6.04  | 1.62  | -1.898555 | 8.85E-61    |
| 1190 | 6094      | ROM1         | 0.86  | 0.23  | -1.902703 | 0.027852942 |
| 1191 | 3903      | LAIR1        | 11.32 | 3.01  | -1.911039 | 4.30E-27    |
| 1192 | 105379561 | LOC105379561 | 2.07  | 0.55  | -1.912127 | 4.94E-04    |
| 1193 | 255809    | C19orf38     | 1.28  | 0.34  | -1.912537 | 0.01520925  |
| 1194 | 100131244 | ANKRD63      | 2.62  | 0.69  | -1.924899 | 9.63E-17    |
| 1195 | 317749    | DHRS4L2      | 2.48  | 0.65  | -1.931828 | 1.24E-04    |
| 1196 | 3356      | HTR2A        | 0.84  | 0.22  | -1.932886 | 2.97E-07    |
| 1197 | 388419    | BTBD17       | 0.84  | 0.22  | -1.932886 | 0.013180769 |
| 1198 | 7031      | TFF1         | 16.63 | 4.34  | -1.938021 | 1.04E-06    |
| 1199 | 9573      | GDF3         | 4.38  | 1.12  | -1.967432 | 1.29E-07    |
| 1200 | 374393    | FAM111B      | 4.37  | 1.11  | -1.977074 | 1.07E-22    |
| 1201 | 7294      | TXK          | 13.46 | 3.41  | -1.980835 | 4.48E-107   |
| 1202 | 2998      | GYS2         | 1.71  | 0.43  | -1.991588 | 1.40E-06    |
| 1203 | 284402    | SCGB2B2      | 0.32  | 0.08  | -2        | 0.027856544 |
| 1204 | 107987290 | LOC107987290 | 2.3   | 0.57  | -2.0126   | 0.005957904 |
| 1205 | 105372267 | NFILZ        | 1.01  | 0.25  | -2.014355 | 1.85E-08    |
| 1206 | 4050      | LTB          | 9.52  | 2.35  | -2.018301 | 3.84E-10    |
| 1207 | 1102      | RCBTB2       | 6.73  | 1.66  | -2.019423 | 6.82E-30    |
| 1208 | 107987457 | LOC107987457 | 2.12  | 0.52  | -2.027481 | 4.85E-10    |
| 1209 | 105379547 | LOC105379547 | 0.37  | 0.09  | -2.039528 | 0.031563321 |
| 1210 | 55799     | CACNA2D3     | 1.96  | 0.47  | -2.060121 | 1.45E-12    |
| 1211 | 127534    | GJB4         | 2.17  | 0.52  | -2.061112 | 5.79E-06    |
| 1212 | 54039     | PCBP3        | 1.17  | 0.28  | -2.06301  | 8.47E-05    |
| 1213 | 50624     | CUZD1        | 1.43  | 0.34  | -2.072408 | 5.18E-05    |
| 1214 | 259307    | IL411        | 5.46  | 1.29  | -2.08153  | 2.85E-14    |
| 1215 | 10677     | AVIL         | 1.19  | 0.28  | -2.087463 | 3.87E-05    |
| 1216 | 10269     | ZMPSTE24     | 29.9  | 7     | -2.094719 | 1.58E-139   |
| 1217 | 202309    | GAPT         | 13.88 | 3.22  | -2.107875 | 3.48E-55    |

|      |           |              |        |       |           |             |
|------|-----------|--------------|--------|-------|-----------|-------------|
| 1218 | 79861     | TUBAL3       | 14.6   | 3.38  | -2.110873 | 8.08E-38    |
| 1219 | 144453    | BEST3        | 0.39   | 0.09  | -2.115477 | 0.010713404 |
| 1220 | 3604      | TNFRSF9      | 6.86   | 1.58  | -2.118284 | 5.26E-68    |
| 1221 | 6503      | SLA          | 4.23   | 0.97  | -2.124601 | 4.52E-20    |
| 1222 | 84163     | GTF2IRD2     | 1.71   | 0.39  | -2.13245  | 2.03E-04    |
| 1223 | 5343      | PLGLB1       | 0.57   | 0.13  | -2.13245  | 7.65E-04    |
| 1224 | 2687      | GGT5         | 1.5    | 0.34  | -2.141356 | 3.56E-06    |
| 1225 | 129881    | CCDC173      | 10.78  | 2.44  | -2.143404 | 2.92E-35    |
| 1226 | 221143    | EEF1AKMT1    | 9.34   | 2.1   | -2.153033 | 2.02E-13    |
| 1227 | 9350      | CER1         | 3.85   | 0.86  | -2.16245  | 1.73E-07    |
| 1228 | 359710    | BPIFB3       | 0.59   | 0.13  | -2.182203 | 0.019216508 |
| 1229 | 654429    | LRTM2        | 2.59   | 0.57  | -2.183918 | 3.58E-20    |
| 1230 | 947       | CD34         | 1.38   | 0.3   | -2.201634 | 1.22E-05    |
| 1231 | 412       | STS          | 0.56   | 0.12  | -2.222392 | 1.79E-07    |
| 1232 | 91752     | ZNF804A      | 7.3    | 1.53  | -2.254365 | 2.78E-59    |
| 1233 | 9173      | IL1RL1       | 6.27   | 1.31  | -2.258899 | 8.40E-35    |
| 1234 | 2041      | EPHA1        | 13.23  | 2.75  | -2.26631  | 7.78E-77    |
| 1235 | 57408     | LRTM1        | 2.61   | 0.54  | -2.273018 | 1.46E-06    |
| 1236 | 84915     | FAM222A      | 4.61   | 0.95  | -2.278767 | 1.27E-30    |
| 1237 | 89790     | SIGLEC10     | 2.05   | 0.42  | -2.287163 | 6.46E-09    |
| 1238 | 79785     | RERGL        | 0.88   | 0.18  | -2.289507 | 0.034297158 |
| 1239 | 91584     | PLXNA4       | 4.11   | 0.84  | -2.290677 | 6.80E-102   |
| 1240 | 84959     | UBASH3B      | 54.45  | 11.08 | -2.296974 | 0           |
| 1241 | 9308      | CD83         | 10.14  | 2.06  | -2.299341 | 7.75E-41    |
| 1242 | 84868     | HAVCR2       | 0.79   | 0.16  | -2.303781 | 8.06E-04    |
| 1243 | 7225      | TRPC6        | 1.64   | 0.33  | -2.313158 | 8.23E-14    |
| 1244 | 80763     | SPX          | 16.53  | 3.31  | -2.320184 | 1.91E-65    |
| 1245 | 647174    | SERPINE3     | 0.05   | 0.01  | -2.321928 | 0.01909782  |
| 1246 | 57053     | CHRNA10      | 0.4    | 0.08  | -2.321928 | 0.006852312 |
| 1247 | 122402    | TDRD9        | 0.3    | 0.06  | -2.321928 | 0.006514205 |
| 1248 | 4049      | LTA          | 3.51   | 0.7   | -2.326044 | 3.37E-06    |
| 1249 | 924       | CD7          | 4.12   | 0.81  | -2.346651 | 4.71E-09    |
| 1250 | 5452      | POU2F2       | 4.35   | 0.84  | -2.372554 | 8.42E-47    |
| 1251 | 93978     | CLEC6A       | 0.52   | 0.1   | -2.378512 | 0.034301498 |
| 1252 | 100049587 | SIGLEC14     | 1.53   | 0.29  | -2.399407 | 1.82E-08    |
| 1253 | 6547      | SLC8A3       | 0.53   | 0.1   | -2.405992 | 5.79E-06    |
| 1254 | 100996939 | PYURF        | 53.05  | 9.81  | -2.435028 | 8.29E-115   |
| 1255 | 9381      | OTOF         | 0.38   | 0.07  | -2.440573 | 1.67E-04    |
| 1256 | 105374013 | LOC105374013 | 8.96   | 1.64  | -2.449803 | 5.53E-70    |
| 1257 | 8605      | PLA2G4C      | 0.22   | 0.04  | -2.459432 | 0.034117672 |
| 1258 | 2251      | FGF6         | 3.45   | 0.62  | -2.476256 | 3.84E-14    |
| 1259 | 1795      | DOCK3        | 0.34   | 0.06  | -2.5025   | 1.38E-04    |
| 1260 | 441155    | LOC441155    | 0.17   | 0.03  | -2.5025   | 0.034100386 |
| 1261 | 353345    | GPR141       | 1.55   | 0.27  | -2.521237 | 2.01E-13    |
| 1262 | 130367    | SGPP2        | 0.46   | 0.08  | -2.523562 | 3.42E-05    |
| 1263 | 3224      | HOXC8        | 0.69   | 0.12  | -2.523562 | 4.75E-04    |
| 1264 | 56833     | SLAMF8       | 8.65   | 1.5   | -2.527738 | 5.06E-46    |
| 1265 | 5553      | PRG2         | 109.75 | 18.94 | -2.534713 | 3.69E-277   |
| 1266 | 51301     | GCNT4        | 0.47   | 0.08  | -2.554589 | 1.16E-05    |
| 1267 | 5342      | PLGLB2       | 1      | 0.17  | -2.556393 | 4.65E-07    |
| 1268 | 2123      | EVI2A        | 0.3    | 0.05  | -2.584963 | 0.020169544 |
| 1269 | 595       | CCND1        | 25.73  | 4.21  | -2.611559 | 1.49E-229   |
| 1270 | 151056    | PLB1         | 0.49   | 0.08  | -2.61471  | 3.48E-07    |
| 1271 | 60437     | CDH26        | 2.83   | 0.46  | -2.621096 | 3.83E-24    |
| 1272 | 284338    | PRR19        | 1.25   | 0.2   | -2.643856 | 4.75E-04    |
| 1273 | 80086     | TUBA4B       | 1.08   | 0.17  | -2.667425 | 0.001354073 |
| 1274 | 100288413 | ERVMER34-1   | 0.32   | 0.05  | -2.678072 | 0.003818497 |
| 1275 | 6310      | ATXN1        | 0.52   | 0.08  | -2.70044  | 2.59E-13    |
| 1276 | 973       | CD79A        | 8.01   | 1.22  | -2.714921 | 1.38E-15    |
| 1277 | 285       | ANGPT2       | 0.66   | 0.1   | -2.722466 | 3.19E-08    |
| 1278 | 643       | CXCR5        | 0.14   | 0.02  | -2.807355 | 0.034096068 |

|      |           |              |       |      |           |             |
|------|-----------|--------------|-------|------|-----------|-------------|
| 1279 | 440730    | TRIM67       | 0.77  | 0.11 | -2.807355 | 1.83E-16    |
| 1280 | 50839     | TAS2R10      | 1.34  | 0.19 | -2.818162 | 0.006724941 |
| 1281 | 642636    | RAD21L1      | 0.3   | 0.04 | -2.906891 | 0.034113349 |
| 1282 | 102723737 | CT45A8       | 0.98  | 0.13 | -2.91427  | 0.01909013  |
| 1283 | 8807      | IL18RAP      | 1.31  | 0.17 | -2.94596  | 7.21E-09    |
| 1284 | 3976      | LIF          | 0.54  | 0.07 | -2.947533 | 9.27E-06    |
| 1285 | 163154    | PRR22        | 0.85  | 0.11 | -2.949959 | 0.003819081 |
| 1286 | 85508     | SCRT2        | 6.78  | 0.86 | -2.978877 | 7.32E-52    |
| 1287 | 343035    | RD3          | 0.64  | 0.08 | -3        | 1.61E-06    |
| 1288 | 84627     | ZNF469       | 0.08  | 0.01 | -3        | 0.004017445 |
| 1289 | 51314     | NME8         | 0.72  | 0.09 | -3        | 1.41E-04    |
| 1290 | 89822     | KCNK17       | 2.46  | 0.3  | -3.035624 | 7.22E-09    |
| 1291 | 26212     | OR2B6        | 2.4   | 0.28 | -3.099536 | 4.37E-05    |
| 1292 | 653489    | RGPD3        | 1.72  | 0.2  | -3.104337 | 4.18E-28    |
| 1293 | 2707      | GJB3         | 0.35  | 0.04 | -3.129283 | 0.034104706 |
| 1294 | 11167     | FSTL1        | 0.09  | 0    | -3.169925 | 0.0264876   |
| 1295 | 56122     | PCDHB14      | 0.18  | 0.02 | -3.169925 | 0.019087569 |
| 1296 | 388372    | CCL4L1       | 1.1   | 0.12 | -3.196397 | 0.019100384 |
| 1297 | 3067      | HDC          | 45.12 | 4.88 | -3.208814 | 4.06E-269   |
| 1298 | 6276      | S100A5       | 0.65  | 0.07 | -3.215013 | 0.034109027 |
| 1299 | 150221    | RIMBP3C      | 0.1   | 0    | -3.321928 | 0.013642202 |
| 1300 | 283446    | MYO1H        | 0.1   | 0.01 | -3.321928 | 0.034126322 |
| 1301 | 57569     | ARHGAP20     | 0.1   | 0.01 | -3.321928 | 0.034121996 |
| 1302 | 241       | ALOX5AP      | 2.01  | 0.2  | -3.329124 | 2.03E-04    |
| 1303 | 200350    | FOXD4L1      | 0.41  | 0.04 | -3.357552 | 0.005793672 |
| 1304 | 102724594 | U2AF1L5      | 44.17 | 4.27 | -3.370759 | 1.65E-86    |
| 1305 | 440712    | RHEX         | 1.5   | 0.14 | -3.421464 | 1.11E-04    |
| 1306 | 160762    | CCDC63       | 0.43  | 0.04 | -3.426265 | 0.019085008 |
| 1307 | 51725     | FBXO40       | 0.11  | 0.01 | -3.459432 | 0.019095256 |
| 1308 | 390439    | OR11G2       | 0.96  | 0.08 | -3.584963 | 0.005794534 |
| 1309 | 6330      | SCN4B        | 0.12  | 0    | -3.584963 | 0.01364409  |
| 1310 | 150094    | SIK1         | 0.13  | 0    | -3.70044  | 0.006969598 |
| 1311 | 273       | AMPH         | 0.14  | 0    | -3.807355 | 0.026491047 |
| 1312 | 389337    | ARHGEF37     | 0.14  | 0.01 | -3.807355 | 0.019092693 |
| 1313 | 116511    | MAS1L        | 0.88  | 0.06 | -3.874469 | 0.001696433 |
| 1314 | 7691      | ZNF132       | 0.15  | 0    | -3.906891 | 0.026466939 |
| 1315 | 9915      | ARNT2        | 4.39  | 0.28 | -3.970722 | 9.13E-92    |
| 1316 | 107985687 | LOC107985687 | 0.16  | 0.01 | -4        | 0.005795397 |
| 1317 | 378948    | RBMV1B       | 0.51  | 0.03 | -4.087463 | 0.003139505 |
| 1318 | 3238      | HOXD12       | 0.18  | 0    | -4.169925 | 0.02647038  |
| 1319 | 2814      | GP5          | 0.37  | 0.02 | -4.209453 | 7.12E-05    |
| 1320 | 26290     | GALNT8       | 0.2   | 0    | -4.321928 | 0.026460059 |
| 1321 | 100423062 | IGLL5        | 3.78  | 0.18 | -4.392317 | 3.86E-14    |
| 1322 | 10205     | MPZL2        | 0.22  | 0    | -4.459432 | 0.026477266 |
| 1323 | 3589      | IL11         | 0.22  | 0    | -4.459432 | 0.013640313 |
| 1324 | 10288     | LILRB2       | 1.12  | 0.05 | -4.485427 | 8.56E-11    |
| 1325 | 100529241 | HSPE1-MOB4   | 0.23  | 0    | -4.523562 | 4.61E-04    |
| 1326 | 57834     | CYP4F11      | 0.25  | 0    | -4.643856 | 0.001812195 |
| 1327 | 30820     | KCNIP1       | 0.27  | 0    | -4.754888 | 0.013638426 |
| 1328 | 100506164 | HSFX1        | 0.28  | 0.01 | -4.807355 | 0.013632766 |
| 1329 | 219995    | MS4A15       | 0.29  | 0    | -4.857981 | 0.026463499 |
| 1330 | 5724      | PTAFR        | 3.61  | 0.12 | -4.910893 | 7.67E-52    |
| 1331 | 80231     | CXorf21      | 0.31  | 0    | -4.954196 | 0.013636538 |
| 1332 | 51676     | ASB2         | 0.32  | 0    | -5        | 0.001812489 |
| 1333 | 100526664 | LY75-CD302   | 0.33  | 0    | -5.044394 | 3.71E-13    |
| 1334 | 221188    | ADGRG5       | 2.97  | 0.09 | -5.044394 | 2.77E-36    |
| 1335 | 914       | CD2          | 0.36  | 0    | -5.169925 | 0.013645979 |
| 1336 | 653659    | TMEM183B     | 0.37  | 0    | -5.209453 | 0.013634652 |
| 1337 | 346171    | ZFP57        | 0.38  | 0    | -5.247928 | 0.003552389 |
| 1338 | 107984139 | LOC107984139 | 0.38  | 0    | -5.247928 | 0.026456621 |
| 1339 | 27033     | ZBTB32       | 0.38  | 0    | -5.247928 | 0.013647869 |

|      |           |              |      |   |           |             |
|------|-----------|--------------|------|---|-----------|-------------|
| 1340 | 9079      | LDB2         | 0.4  | 0 | -5.321928 | 1.17E-04    |
| 1341 | 102723360 | LOC102723360 | 0.41 | 0 | -5.357552 | 4.21E-10    |
| 1342 | 140       | ADORA3       | 0.5  | 0 | -5.643856 | 9.15E-04    |
| 1343 | 100533467 | BIVM-ERCC5   | 0.53 | 0 | -5.72792  | 6.18E-12    |
| 1344 | 107080644 | CNPY3-GNMT   | 0.62 | 0 | -5.954196 | 0.02648071  |
| 1345 | 1475      | CSTA         | 0.85 | 0 | -6.409391 | 0.026484154 |
| 1346 | 6779      | STATH        | 0.99 | 0 | -6.629357 | 0.026473822 |
| 1347 | 5940      | RBMV1A1      | 1.77 | 0 | -7.467606 | 1.03E-10    |

---
